# Supplementary material for: Highly stereoselective directed reactions and an efficient synthesis of azafuranoses from a chiral aziridine
Source: Royal Society of Chemistry journal article supplement (doi:10.1039/c3ob27390c), 2013-01-01
Supplement: c3ob27390c.pdf [file c3ob27390c.pdf]

# Electronic supplementary information (ESI)

## Highly Stereoselective Directed Reactions and an Efficient Synthesis of Azafuranose from a Chiral Aziridine

Hogyu Lee<sup>a</sup>, Jun Hee Kim<sup>a</sup>, Won Koo Lee<sup>a,\*</sup>, Jae heung Cho<sup>b</sup>, Wonwoo Nam<sup>c</sup>, Jaedeok Lee<sup>d</sup>, Hyun-Joon Ha<sup>d,\*</sup>

<sup>a</sup>Department of Chemistry, Sogang University, Seoul 121-742, Korea. E-mail: [wonkoo@sogang.ac.kr](mailto:wonkoo@sogang.ac.kr)

<sup>b</sup>Department of Emerging Materials Science, DGIST, Daegu 711-873, Korea

<sup>c</sup>Department of Chemistry and Nano Science, Department of Bioinspired Science, EwhaWomans University, Seoul 120-750, Korea

<sup>d</sup>Department of Chemistry and Protein Research Center for Bio-Industry, Hankuk University of Foreign Studies, Yongin 449-719, Korea. E-mail: [hjha@hufs.ac.kr](mailto:hjha@hufs.ac.kr)

### Table of Contents

|                                                       |       |
|-------------------------------------------------------|-------|
| 1. NMR Spectra of all compounds ( <b>1-9</b> ) .....  | 2-63  |
| 2. X-Ray Crystal Structure of Compound <b>6</b> ..... | 64-67 |

Std proton

File: xp

Pulse Sequence: s2pu1

Solvent: cdc13

Ambient temperature

Operator: LWK

VNMRS-400 "Varian-NMR"

Relax. delay 1.000 sec

Pulse 45.0 degrees

Acq. time 2.049 sec

Width 6410.3 Hz

8 repetitions

OBSERVE H1, 399.7193723 MHz

DATA PROCESSING

Resol. enhancement -0.0 Hz

FT size 65536

Total time 0 min, 30 sec

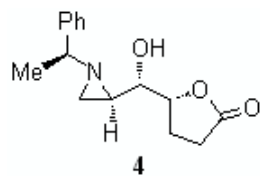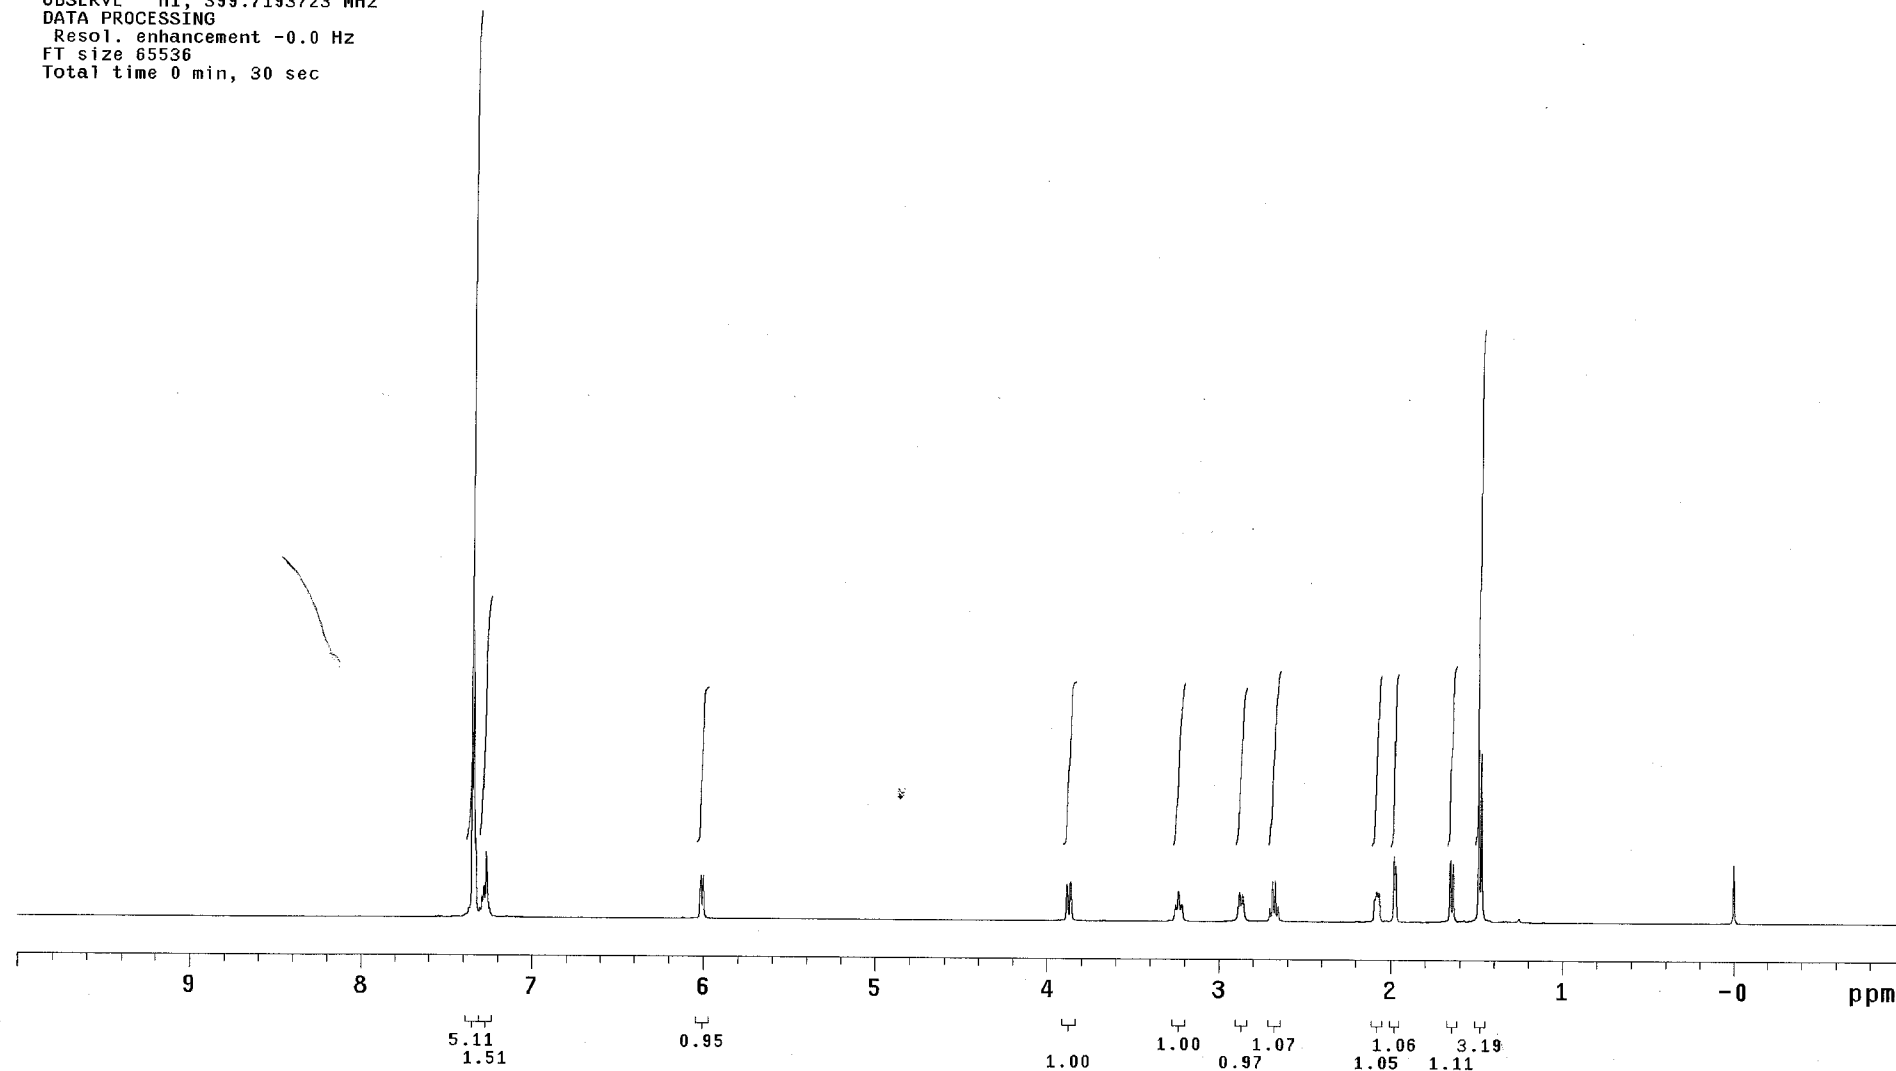

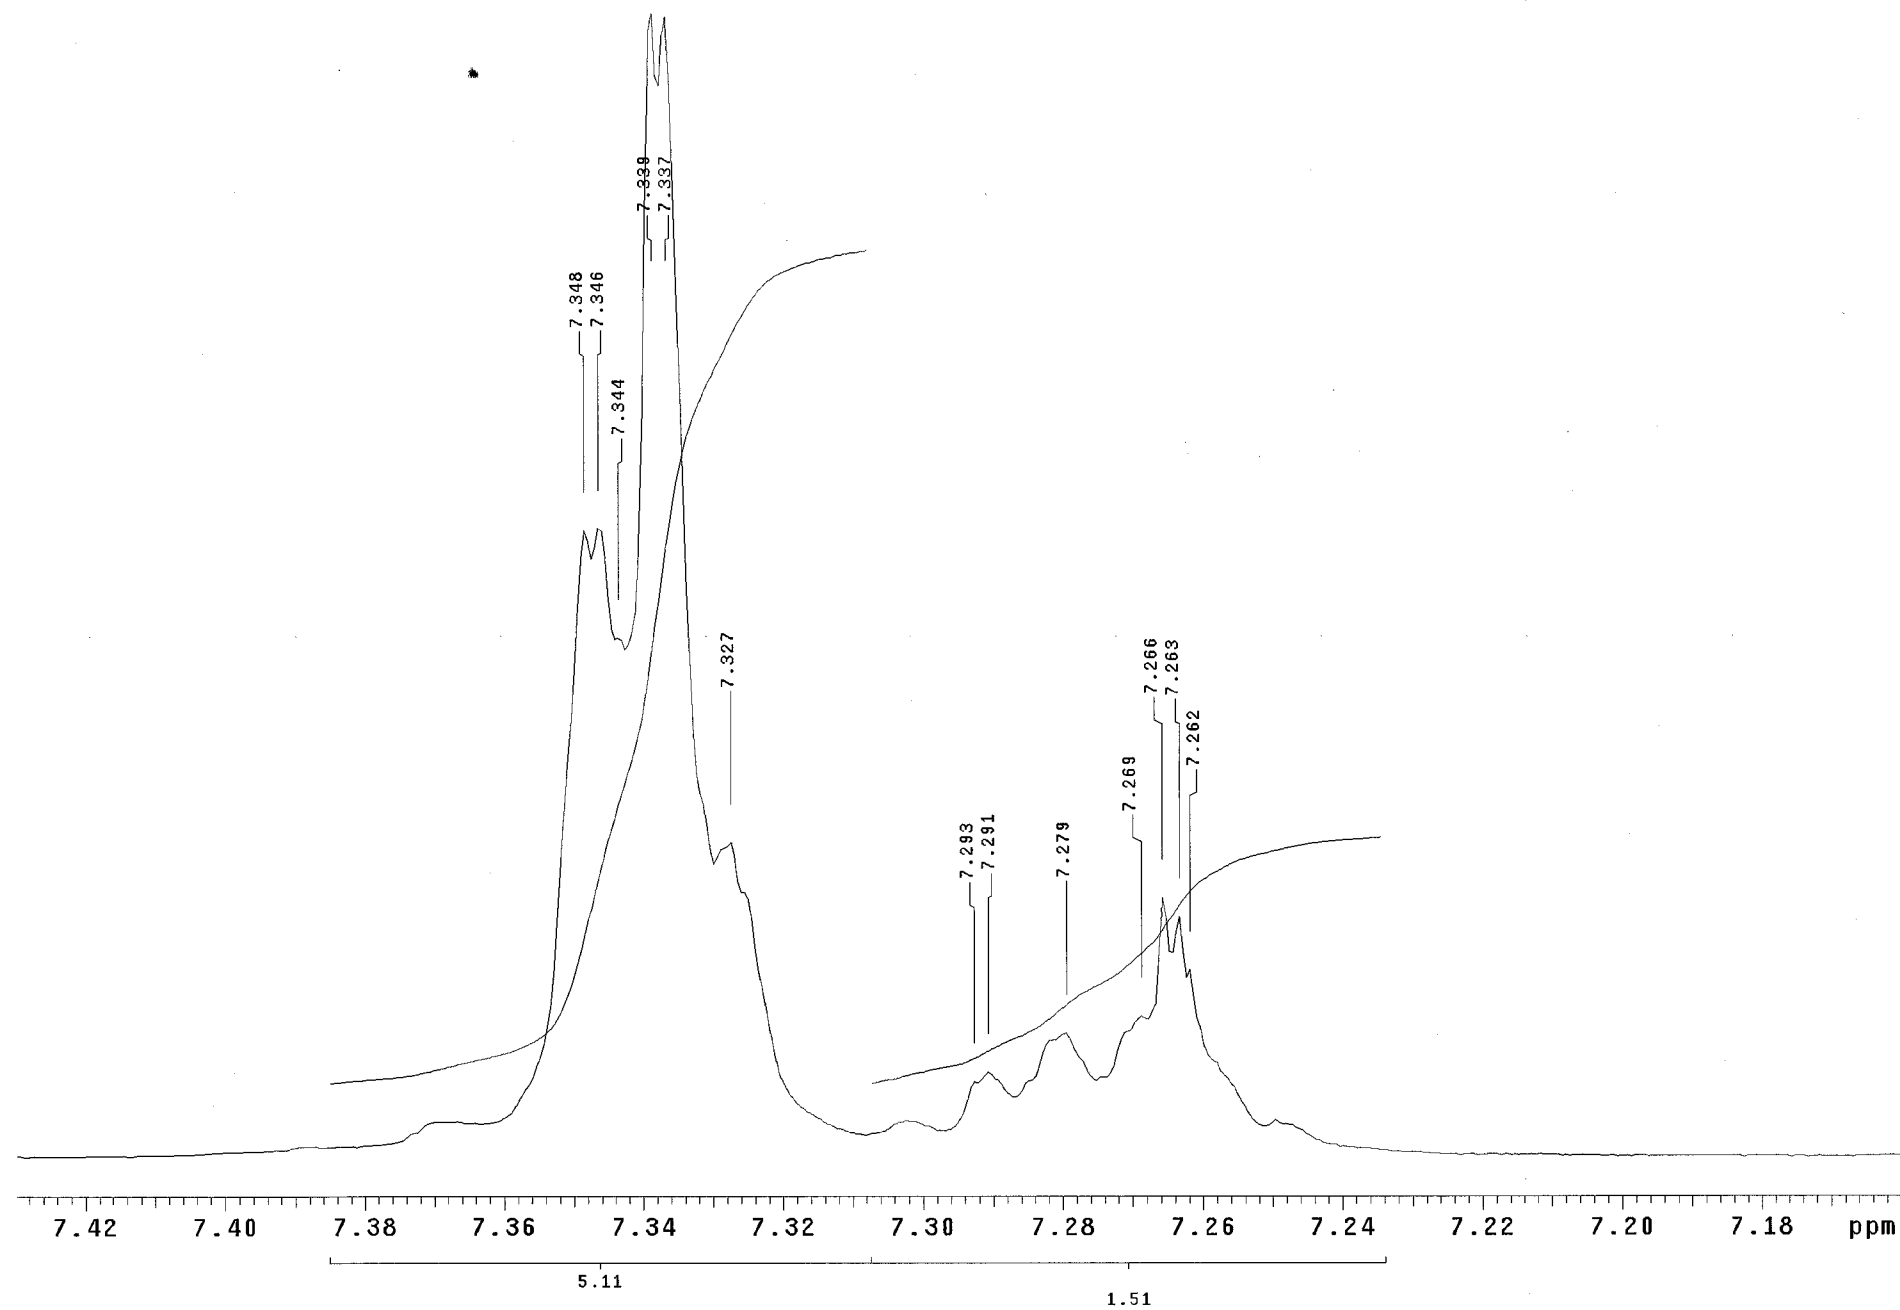

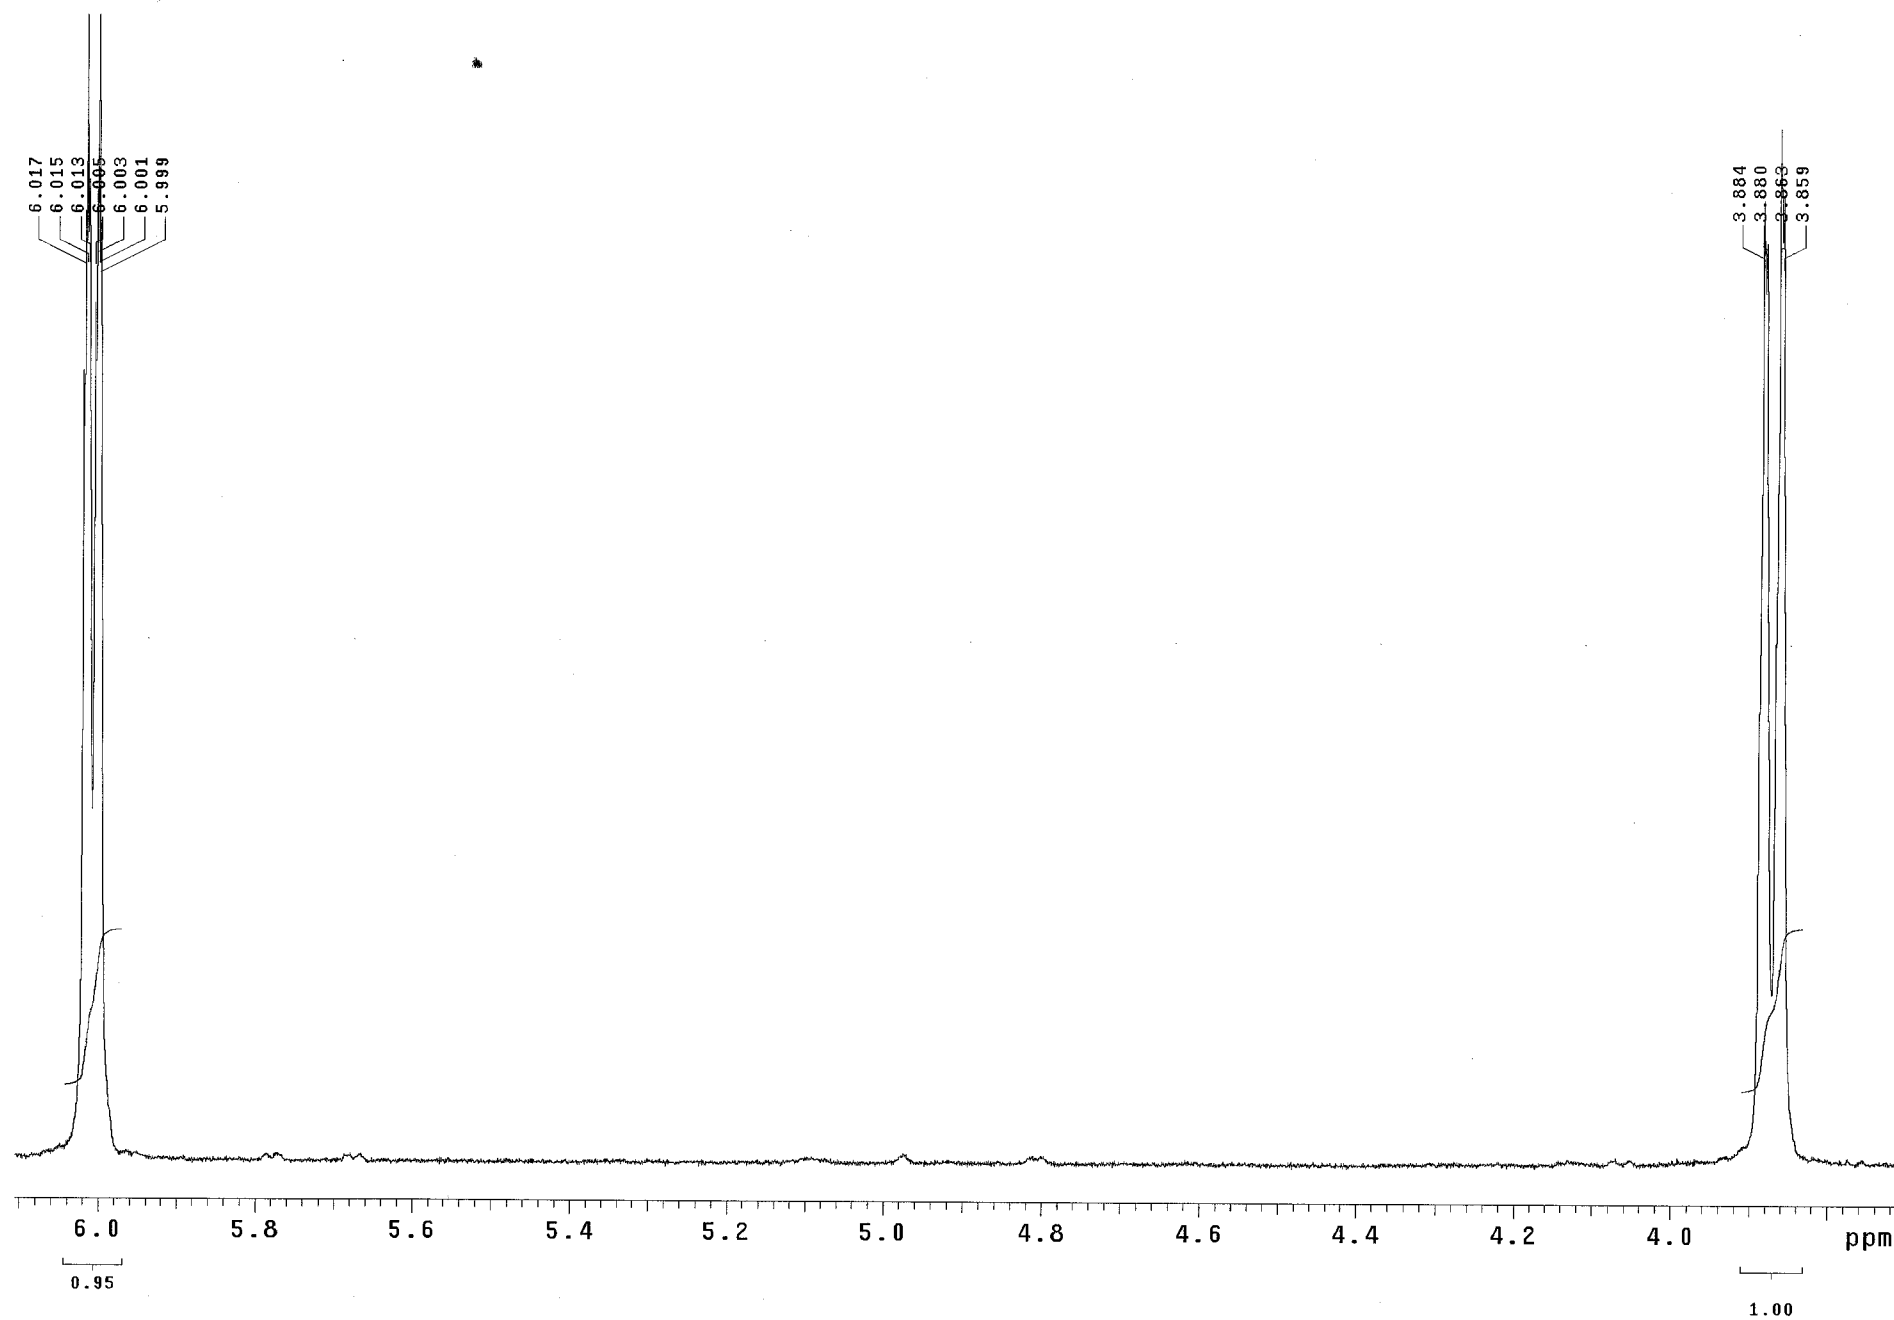

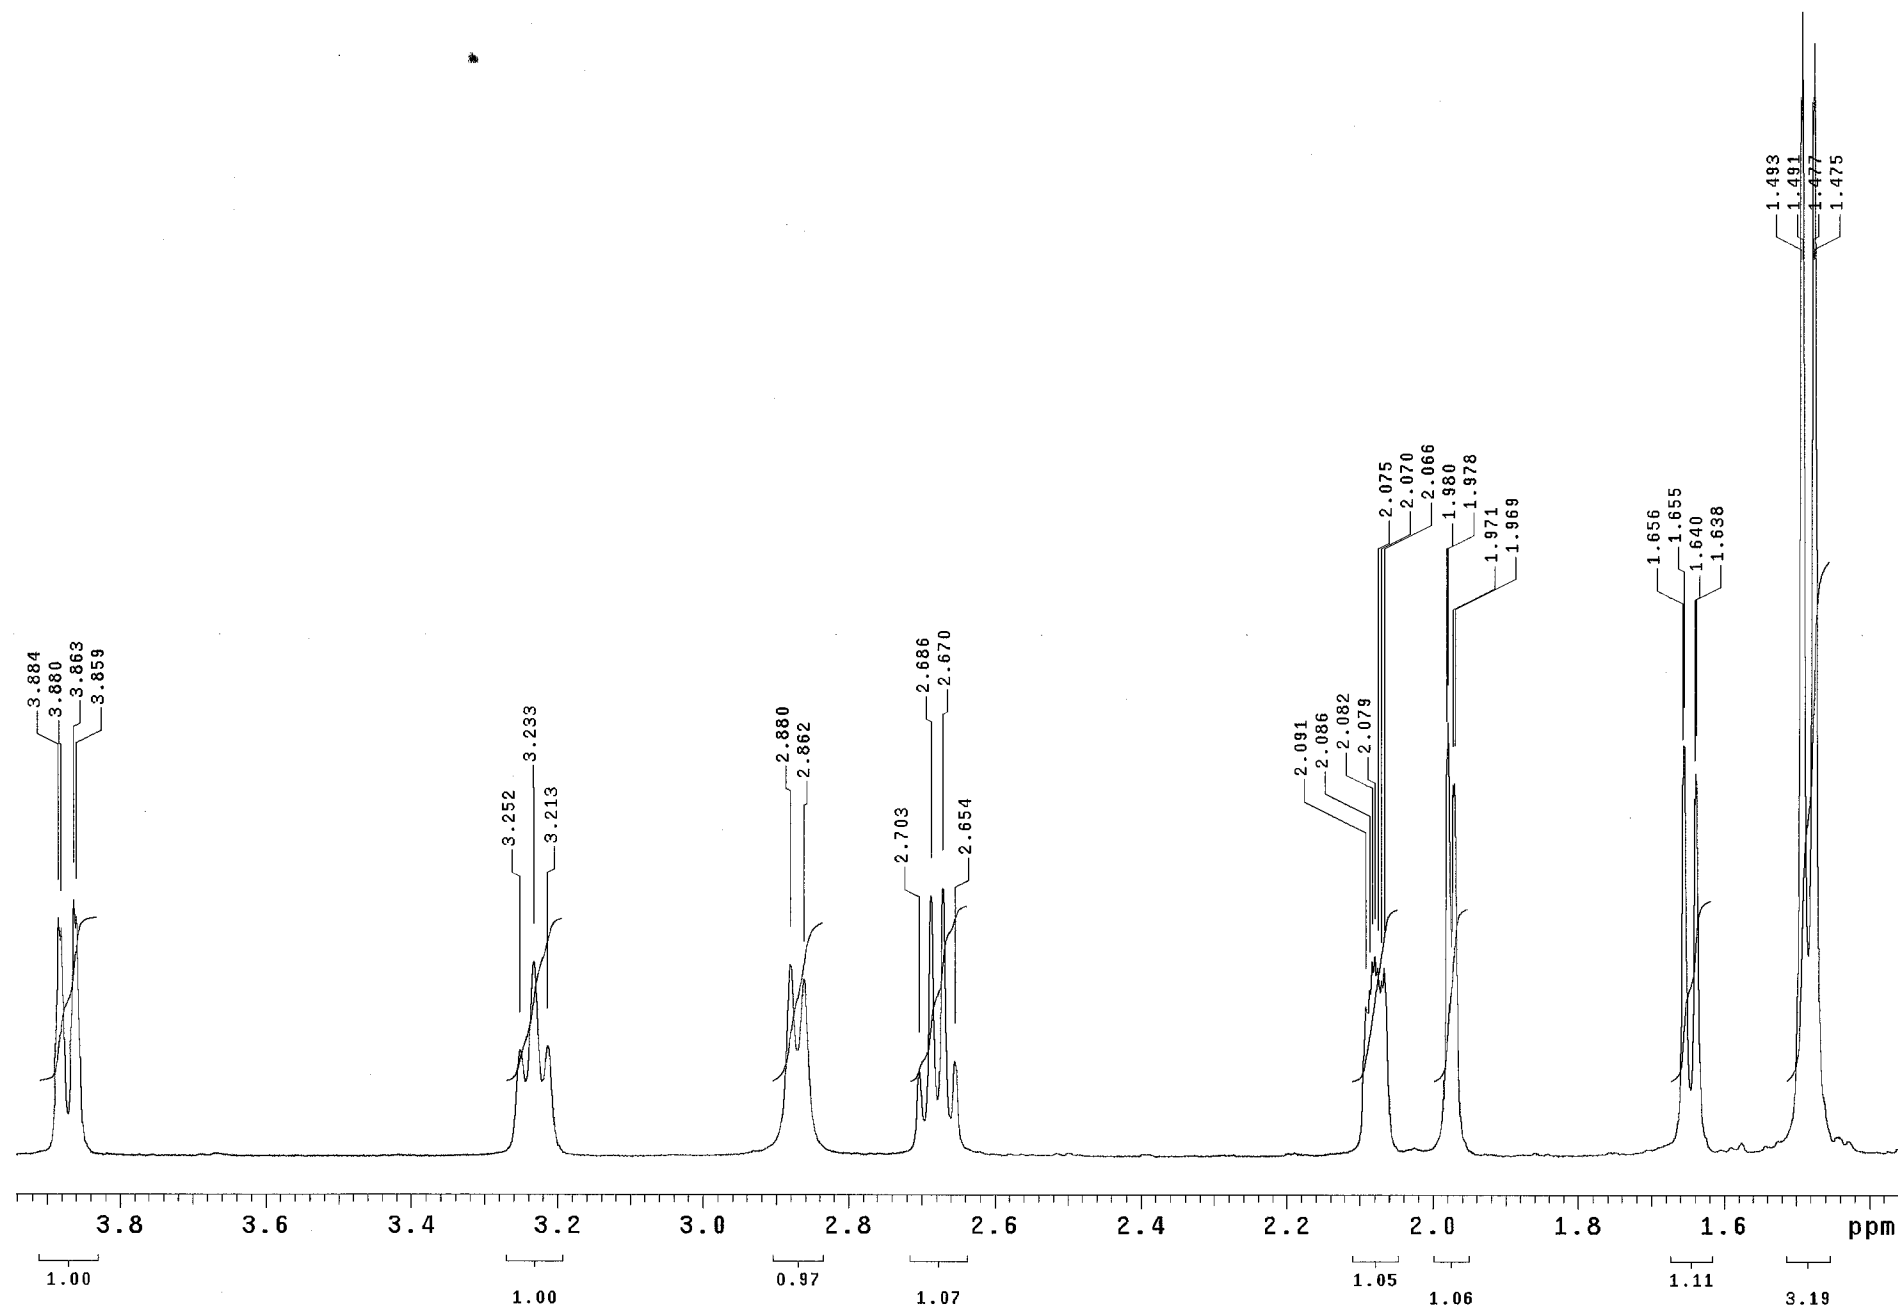

Std carbon

File: xp

Pulse Sequence: s2pu1

Solvent: cdc13

Ambient temperature

Operator: LWK

VNMRS-400 "Varian-NMR"

Relax. delay 1.000 sec

Pulse 45.0 degrees

Acq. time 1.300 sec

Width 24509.8 Hz

360 repetitions

OBSERVE C13, 100.5150857 MHz

DECOUPLE H1, 399.7435210 MHz

Power 37 dB

continuously on

WALTZ-16 modulated

DATA PROCESSING

Line broadening 0.5 Hz

FT size 65536

Total time 38 min, 21 sec

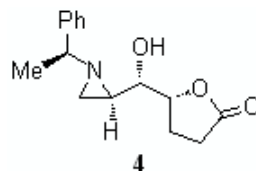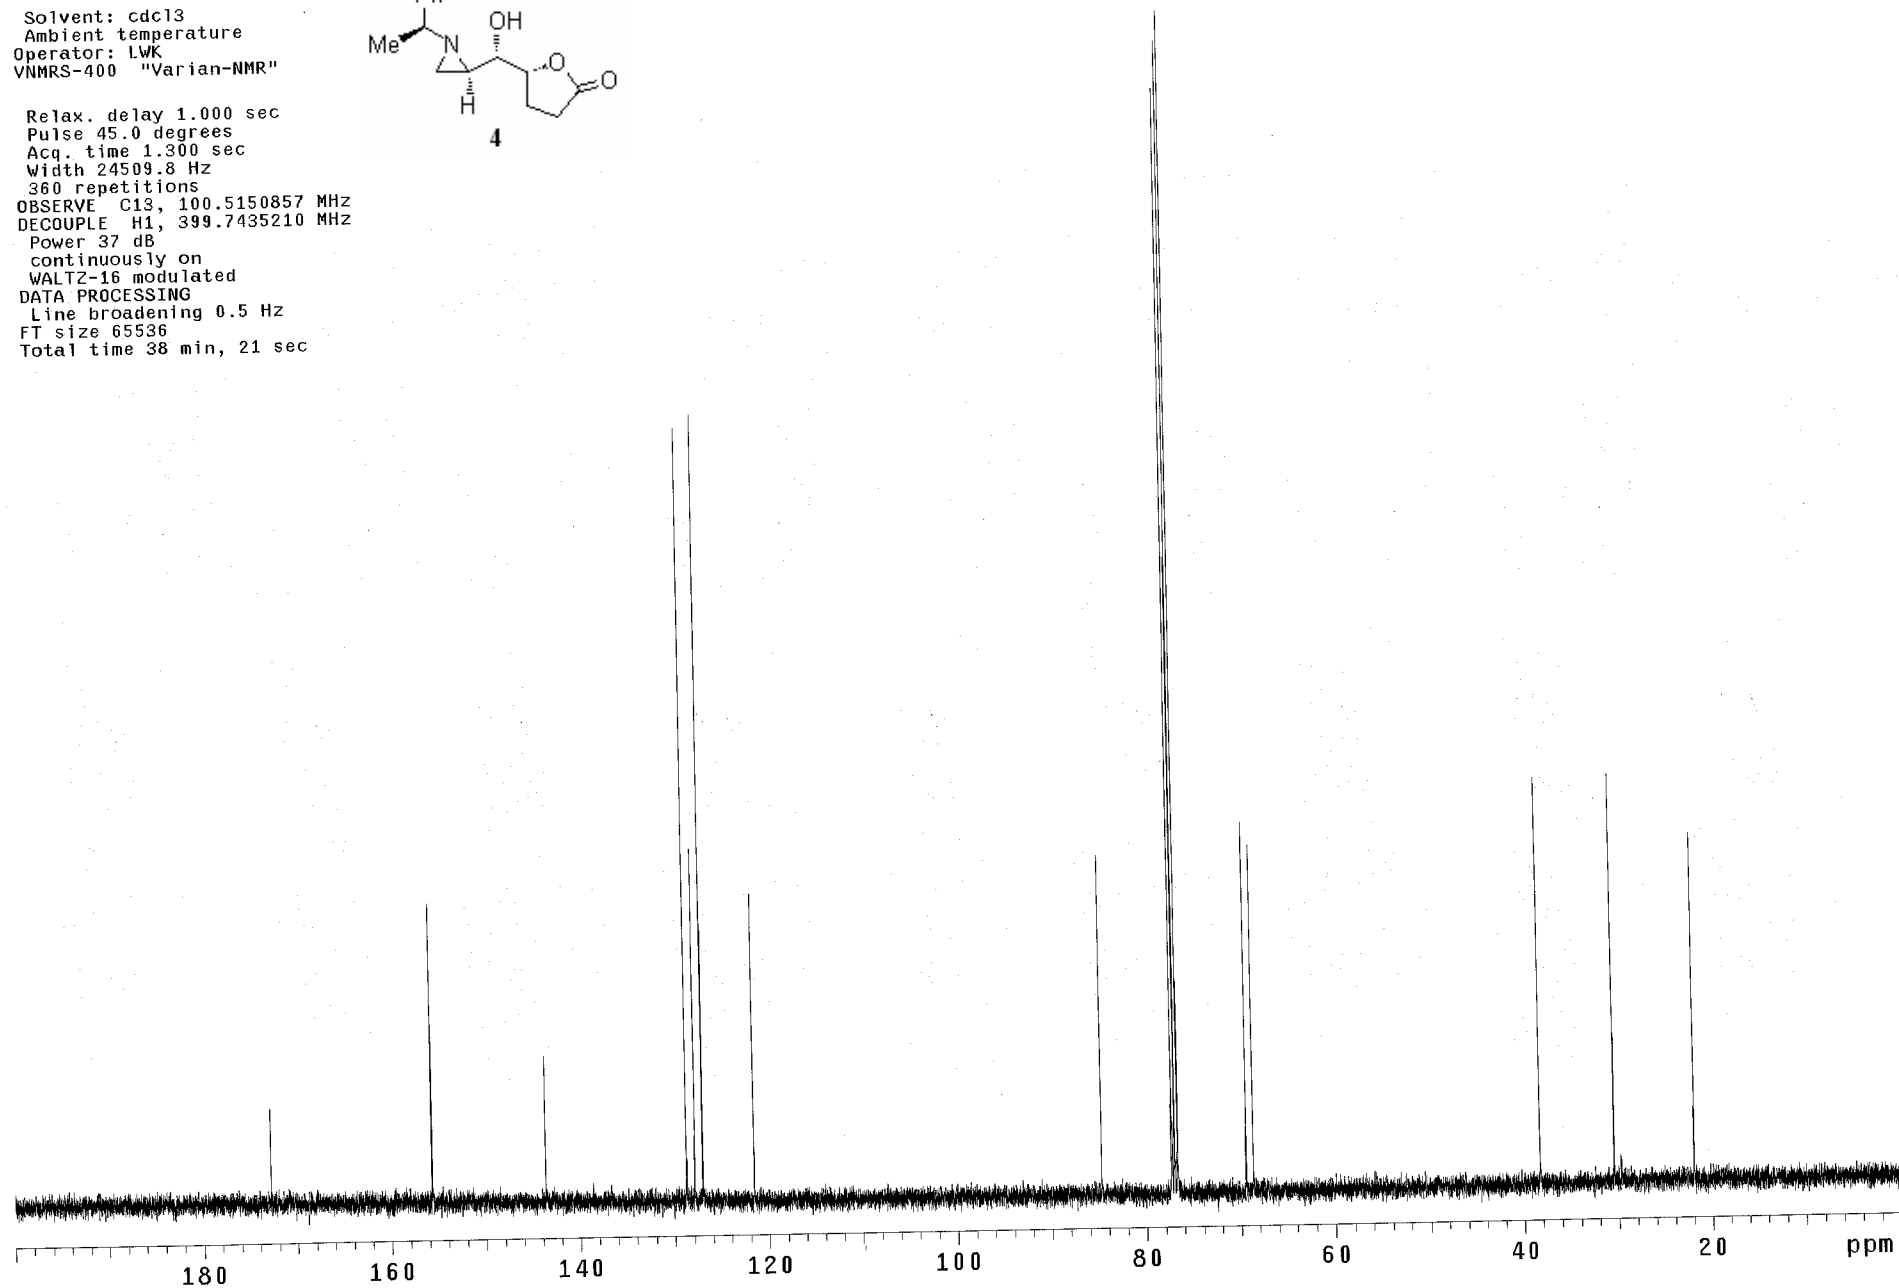

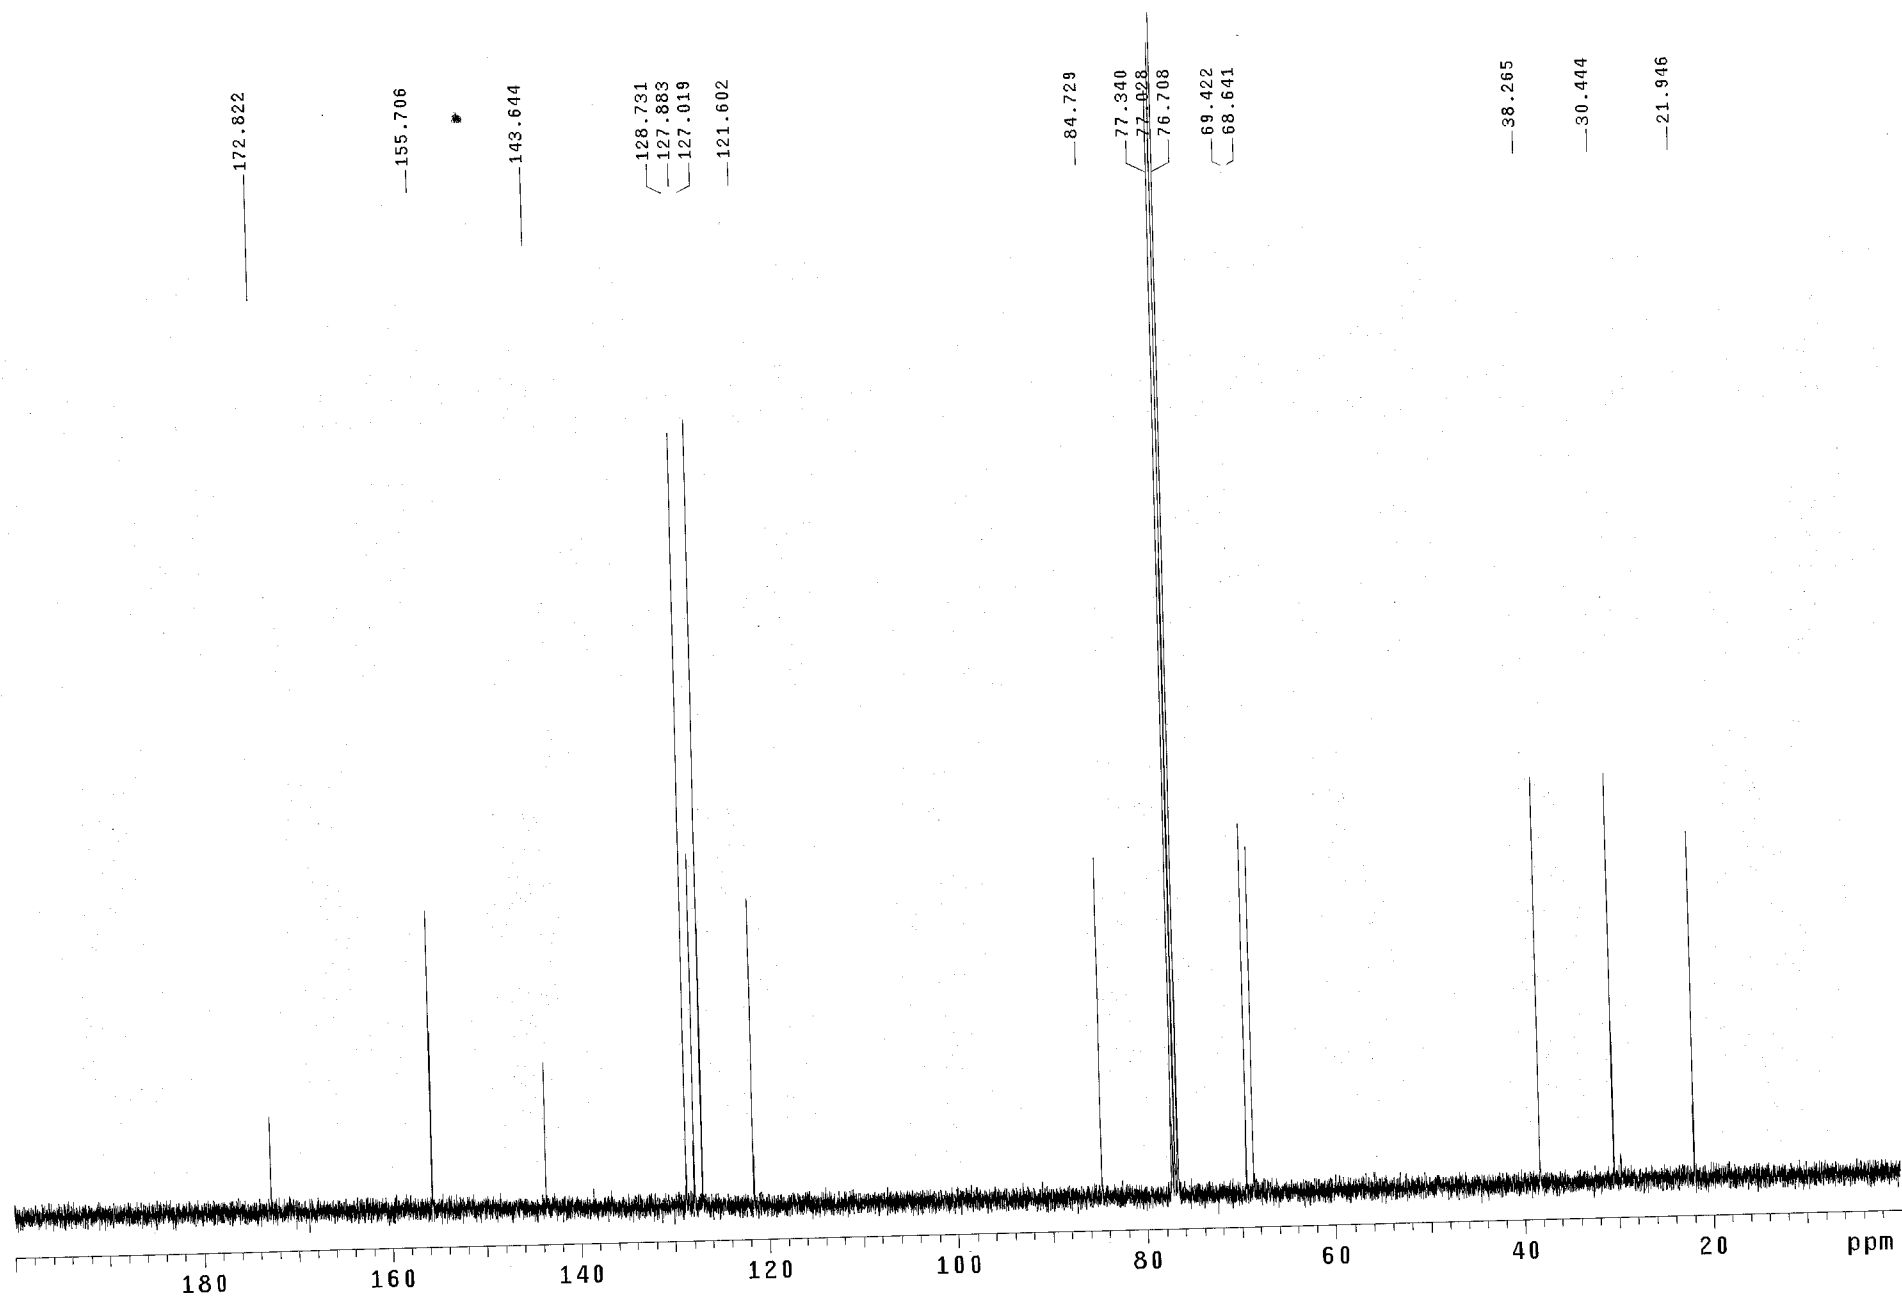

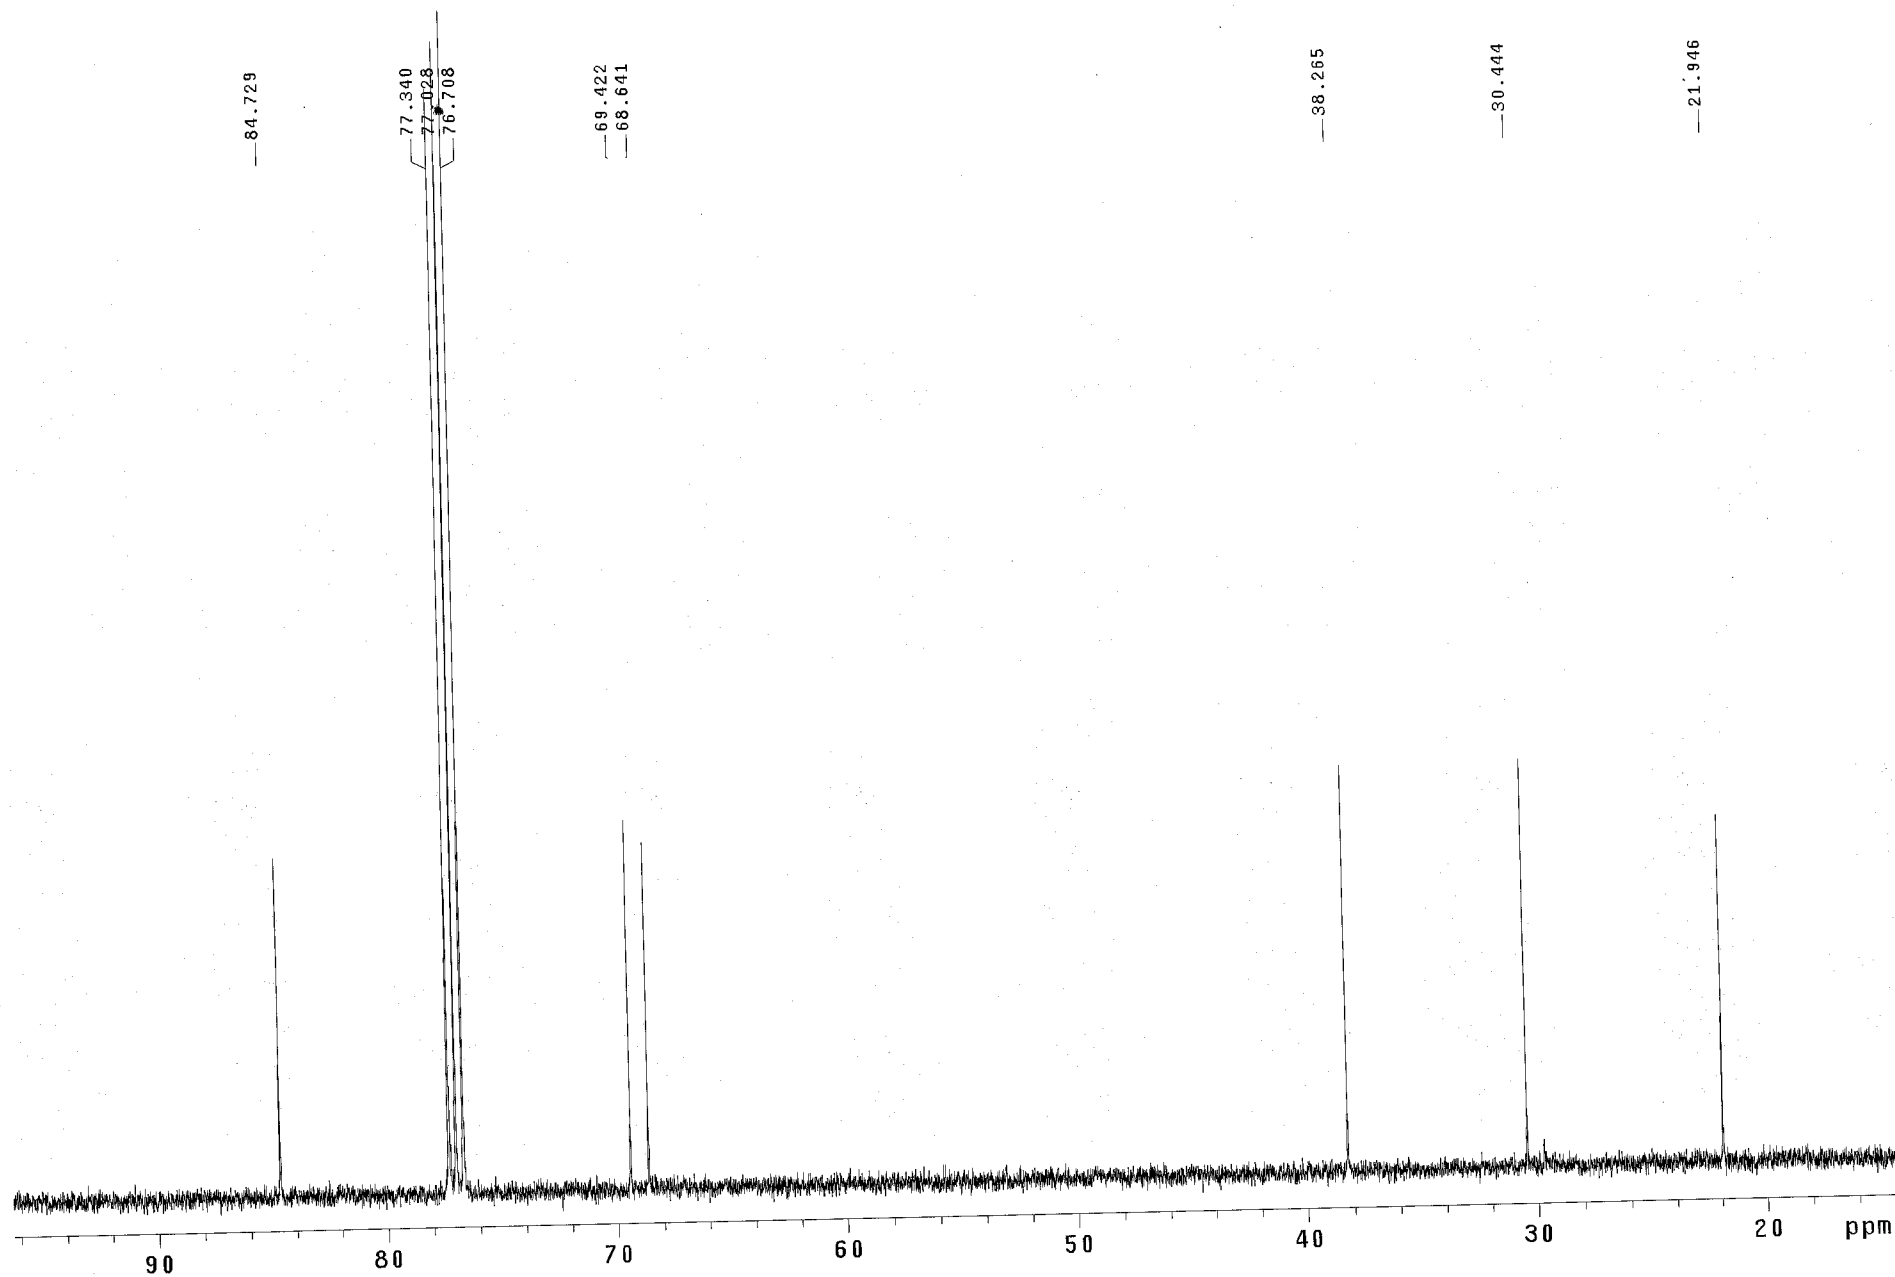



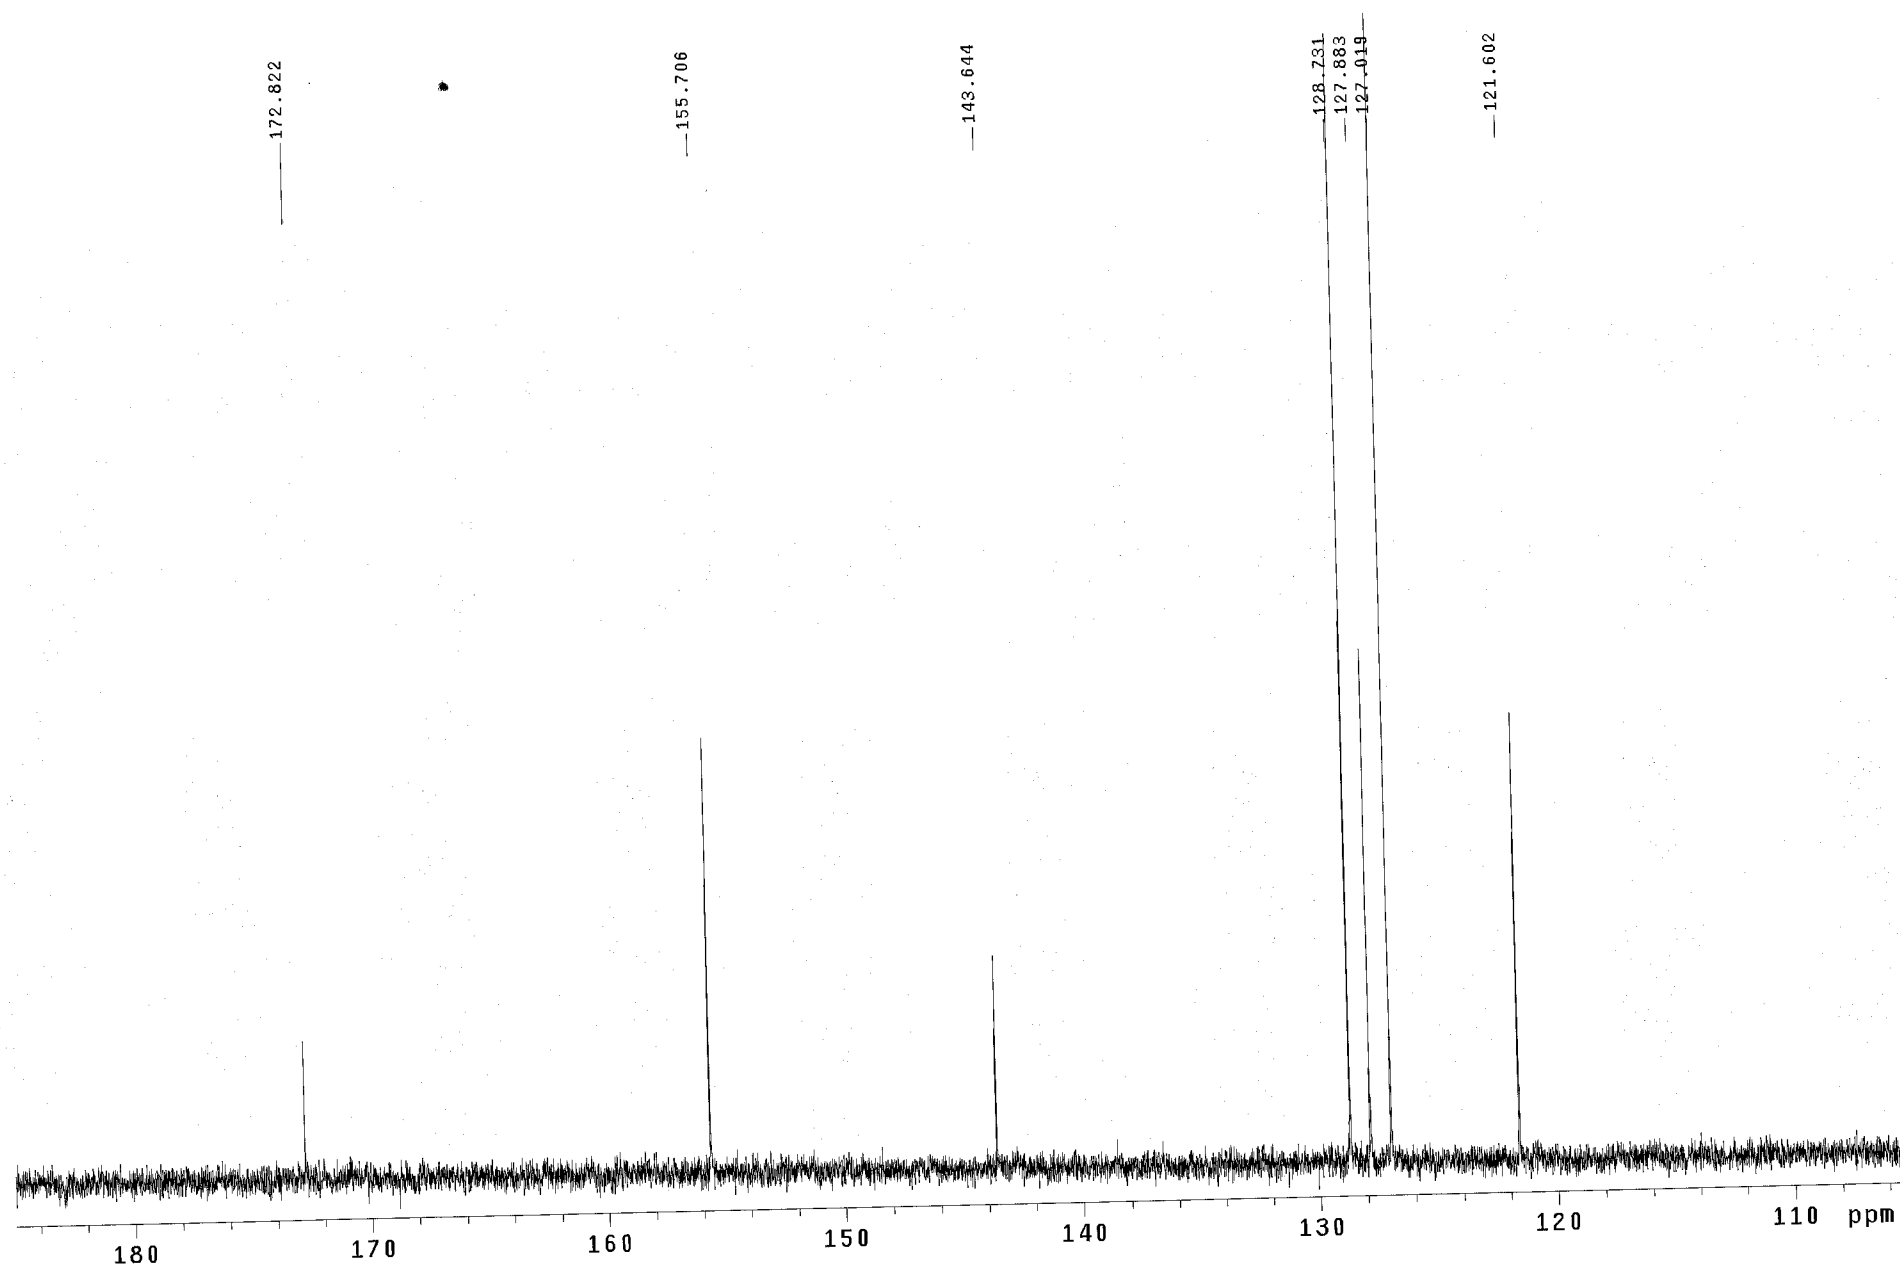

Std proton

File: xp

Pulse Sequence: s2pu1

Solvent: cdc13

Ambient temperature

Operator: LWK

VNMRS-400 "Varian-NMR"

Relax. delay 1.000 sec

Pulse 45.0 degrees

Acq. time 2.049 sec

Width 6410.3 Hz

16 repetitions

OBSERVE H1, 399.7063368 MHz

DATA PROCESSING

Resol. enhancement -0.0 Hz

FT size 65536

Total time 0 min, 55 sec

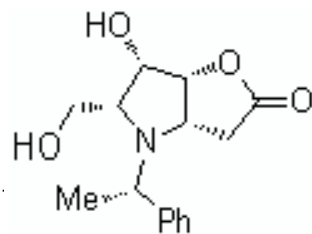

5

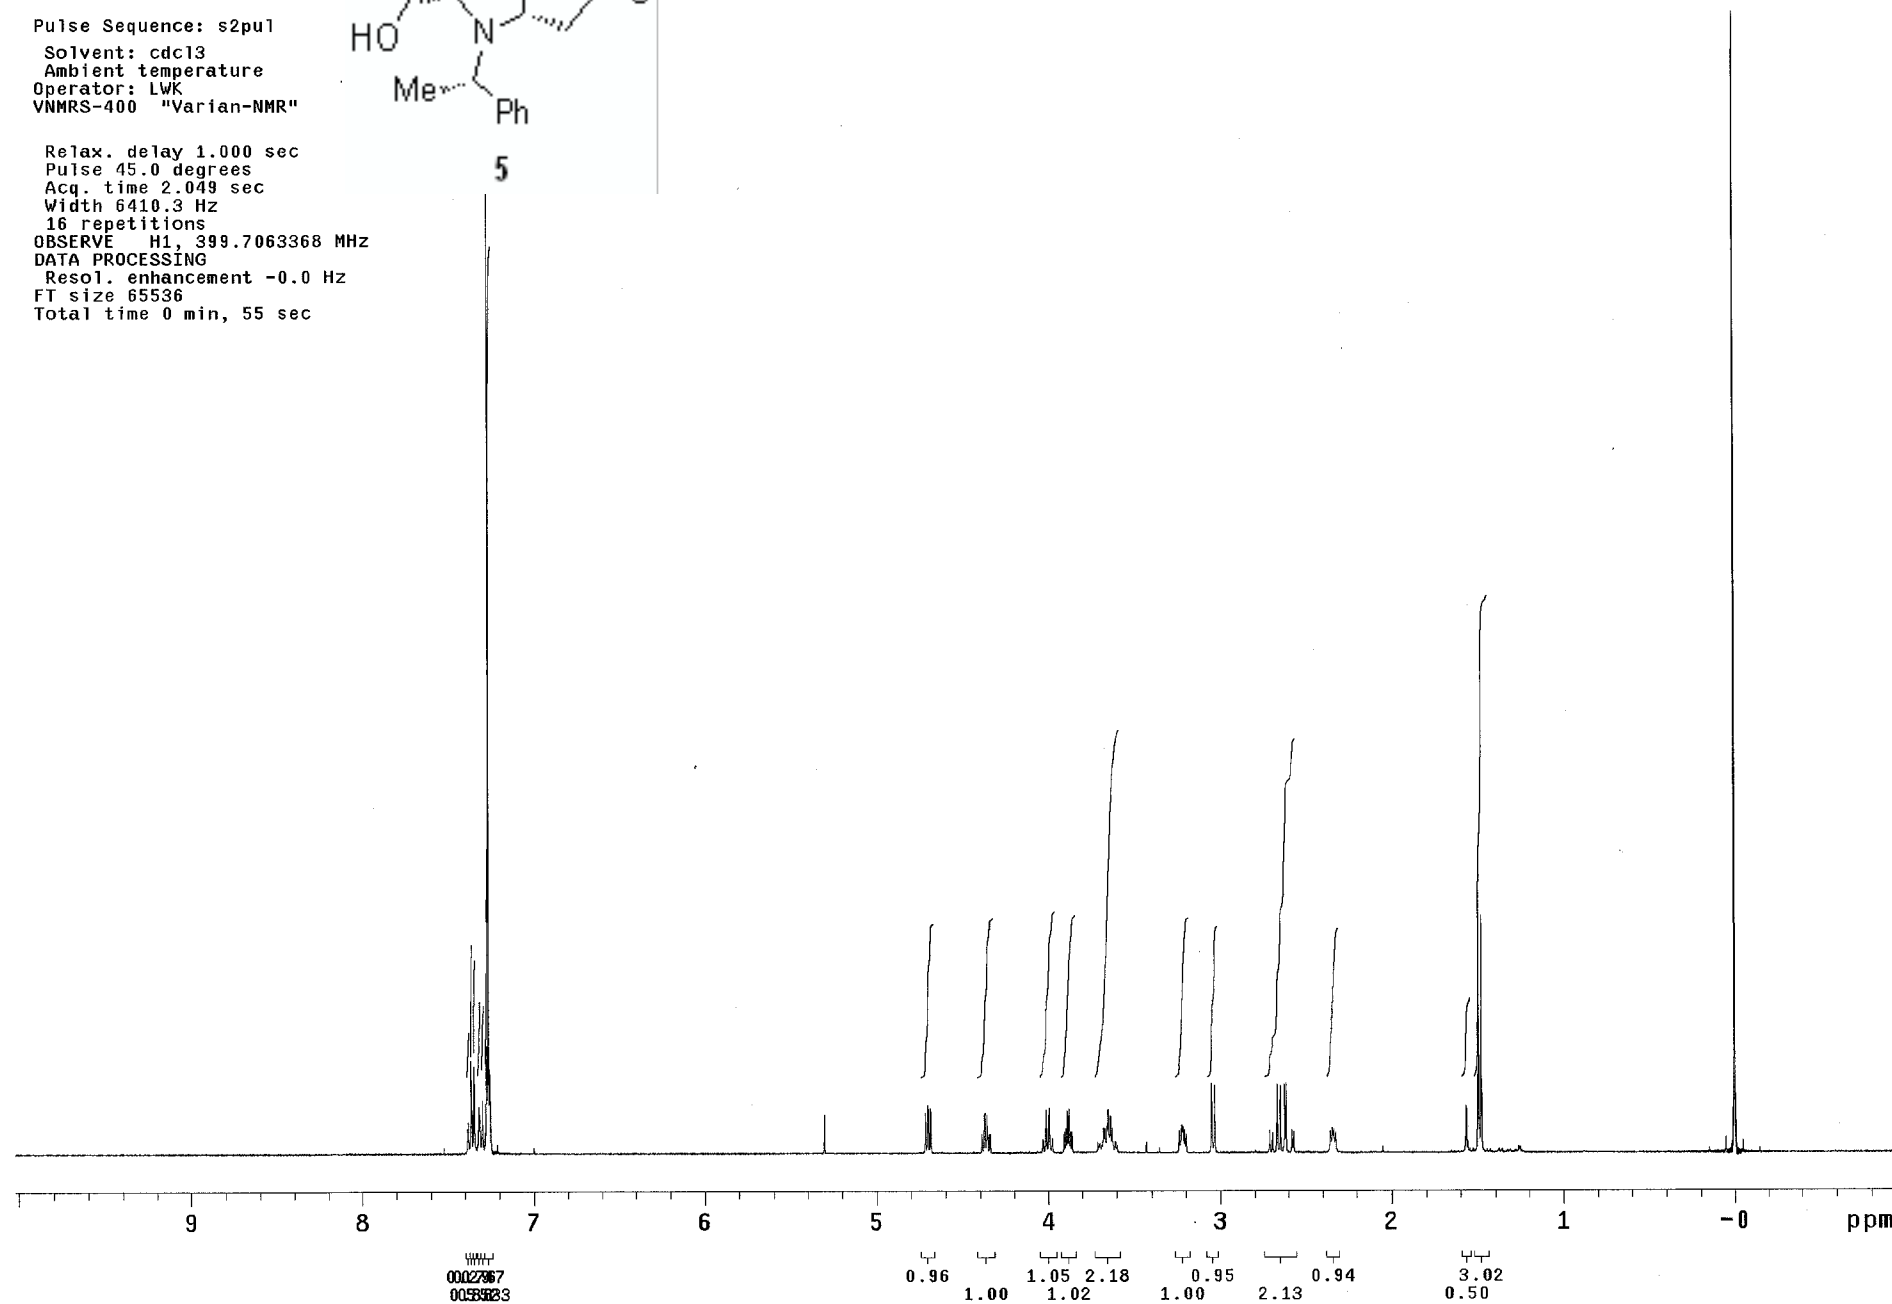

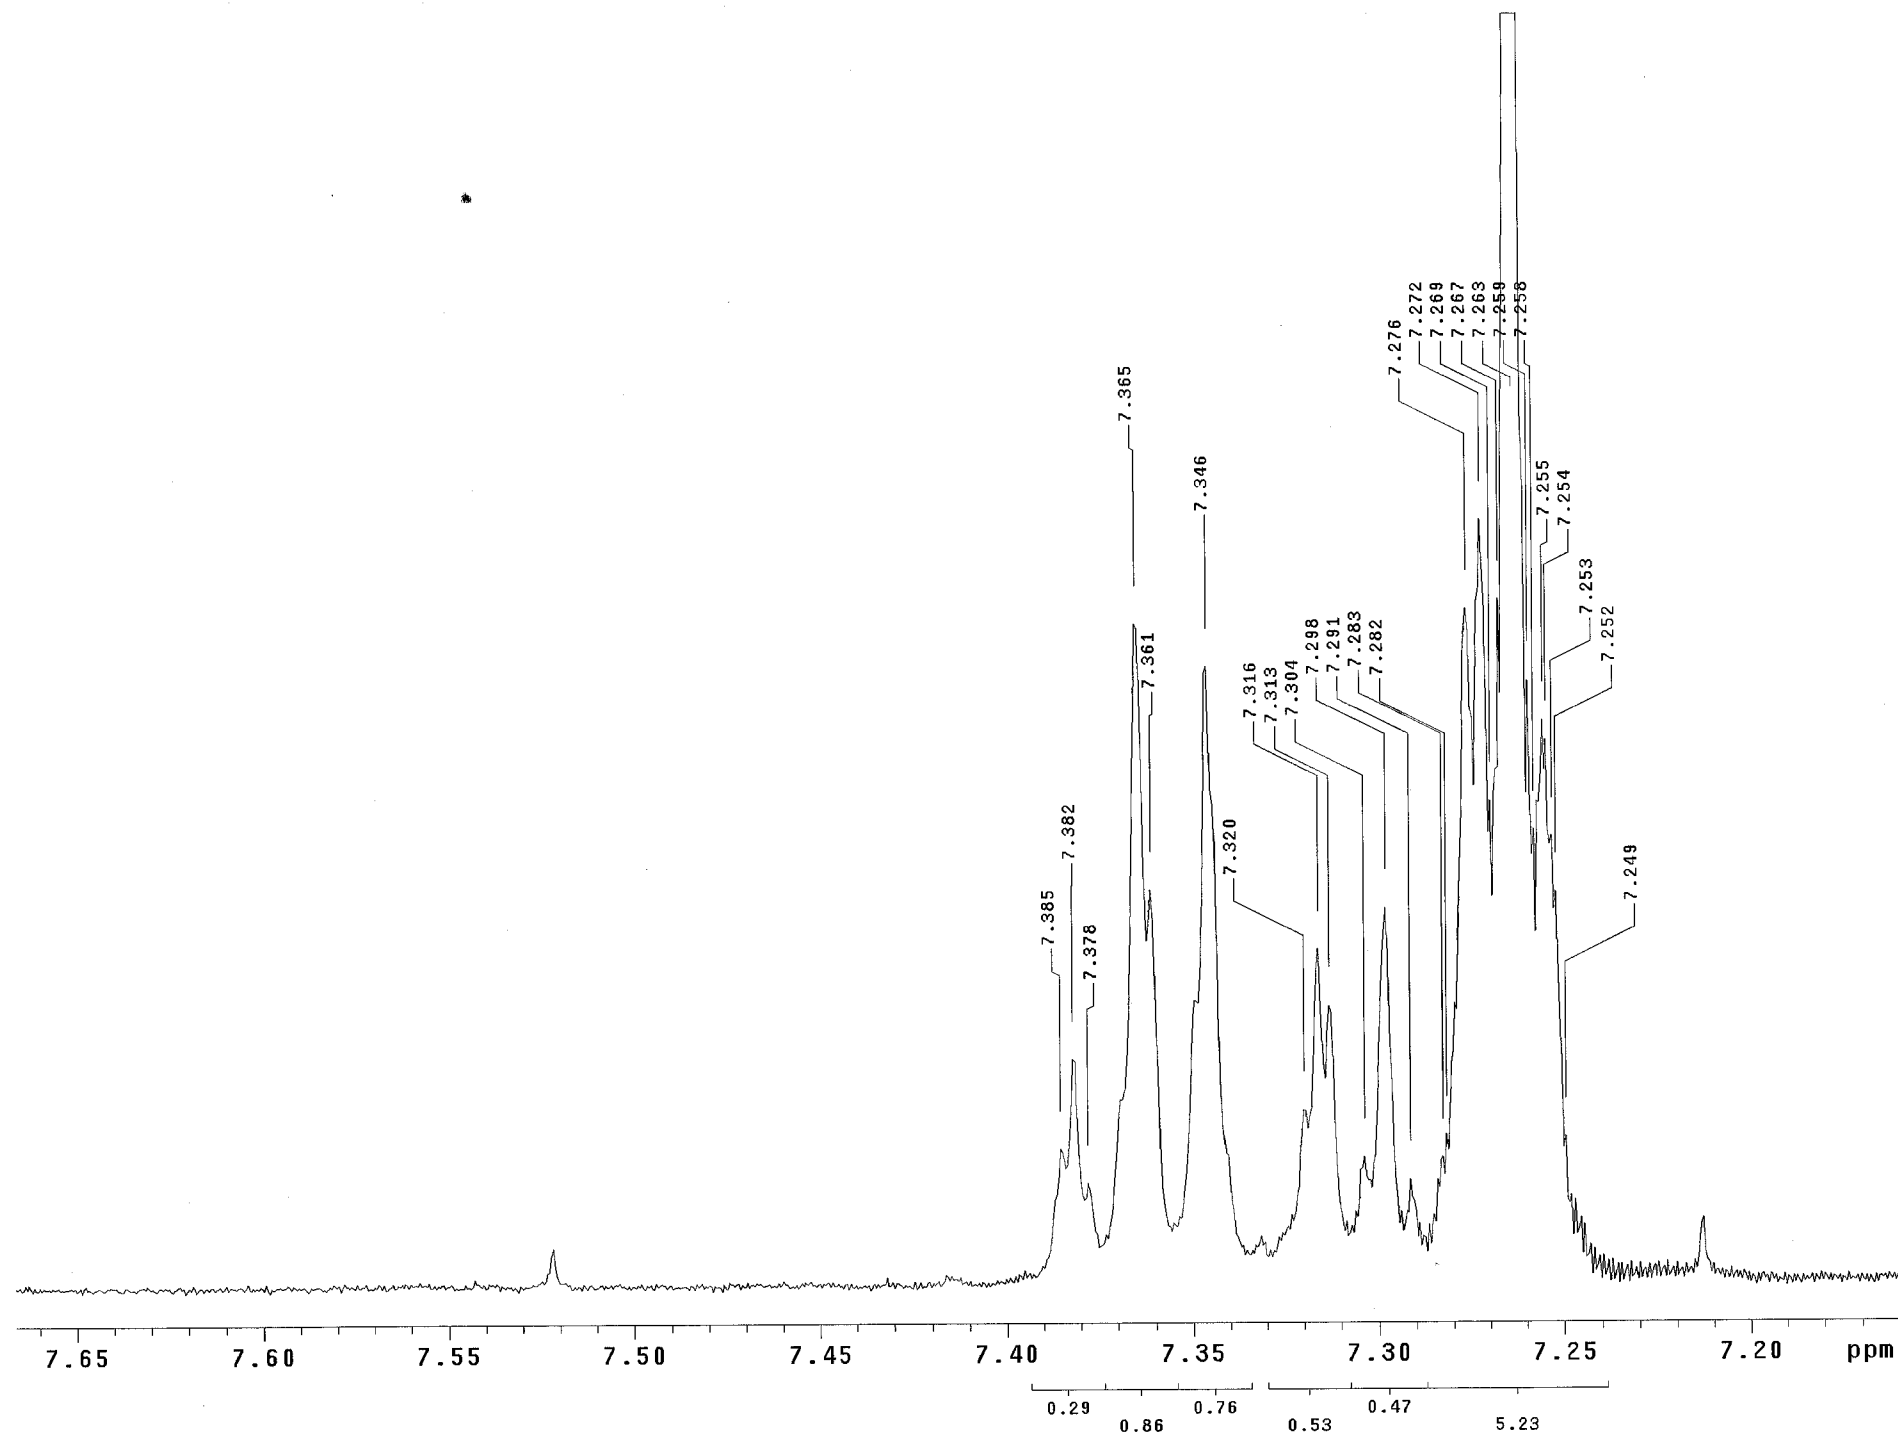

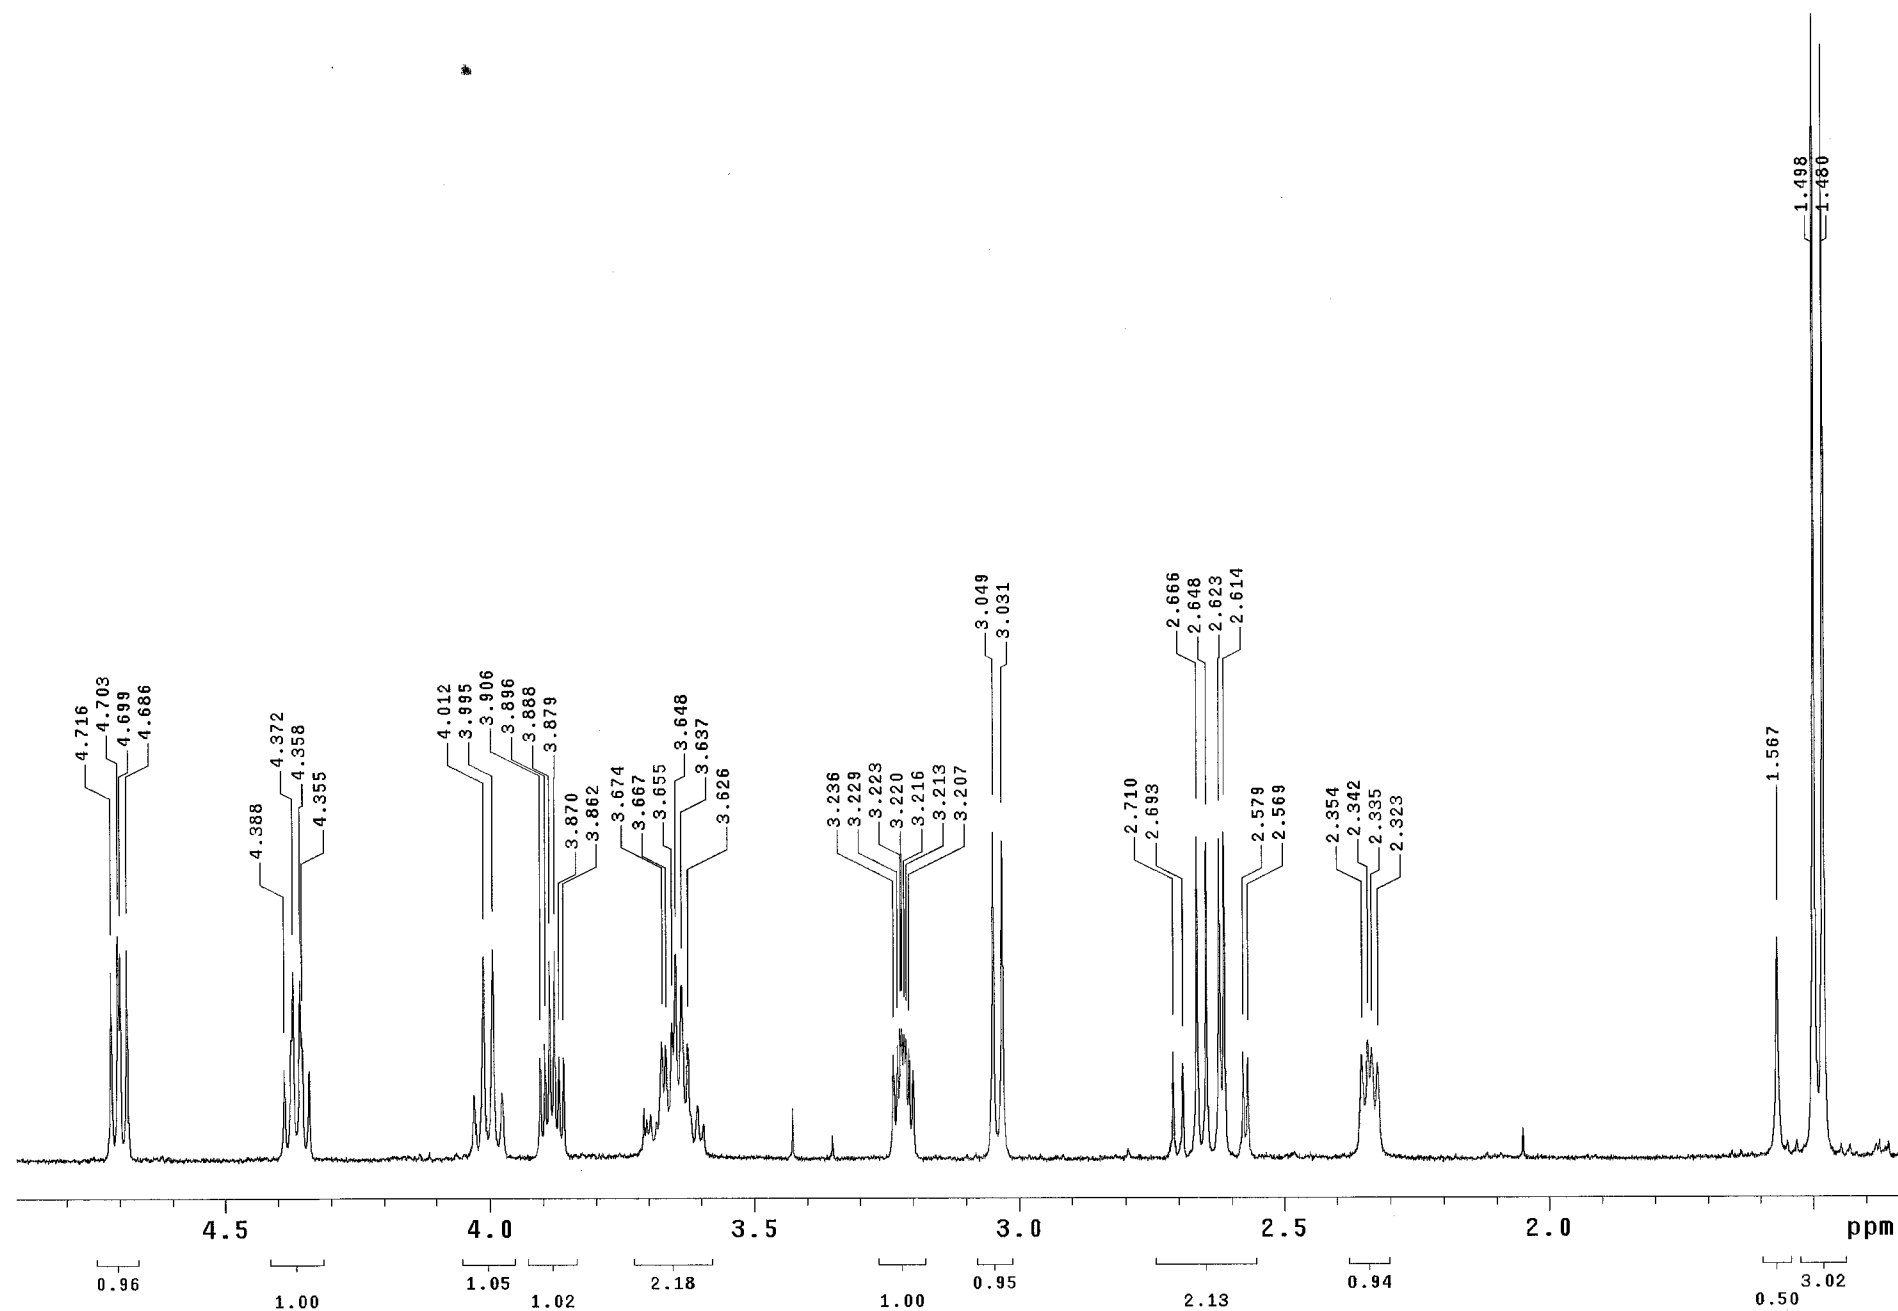

Std carbon

File: xp

Pulse Sequence: s2pu1

Solvent: cdc13

Ambient temperature

Operator: LWK

VNMR5-400 "Varian-NMR"

Relax. delay 1.000 sec

Pulse 45.0 degrees

Acq. time 1:300 sec

Width 24509.8 Hz

192 repetitions

OBSERVE C13, 100.5039471 MHz

DECOUPLE H1, 399.6992231 MHz

Power 37 dB

continuously on

WALTZ-16 modulated

DATA PROCESSING

Line broadening 0.5 Hz

FT size 65536

Total time 1 hr, 16 min, 41 sec

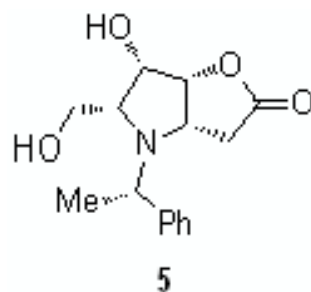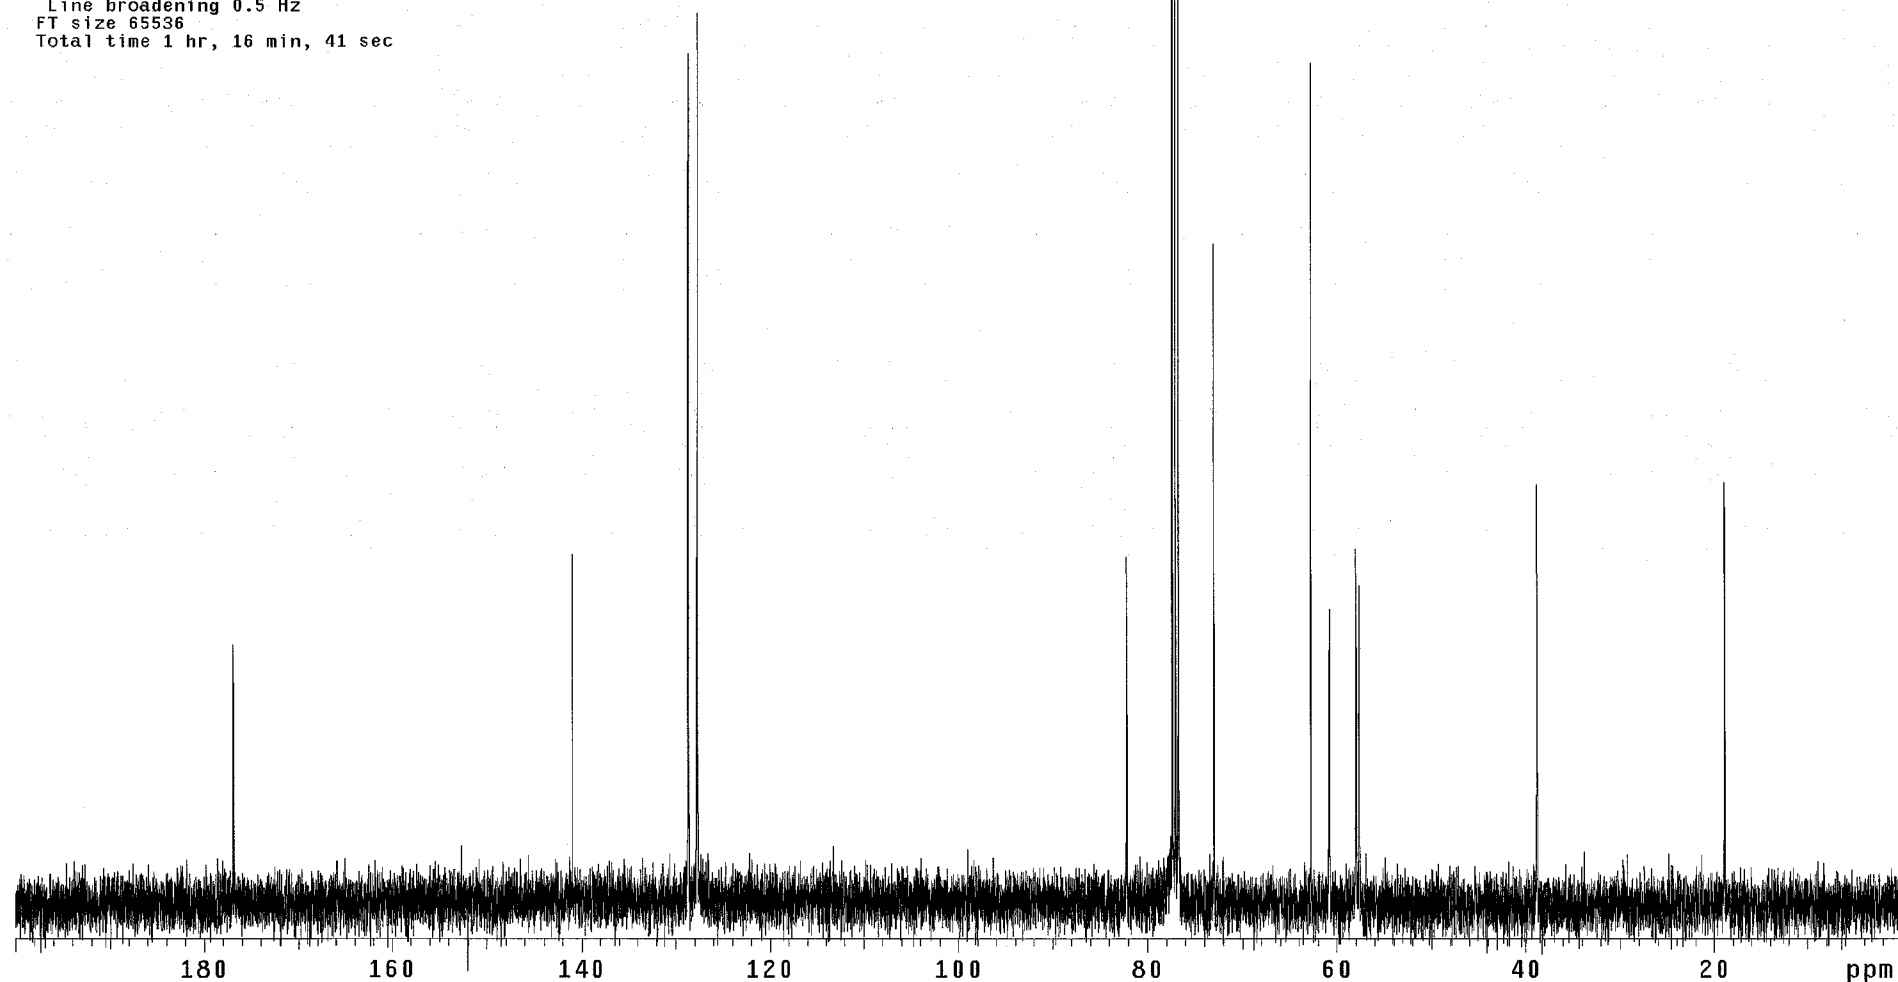

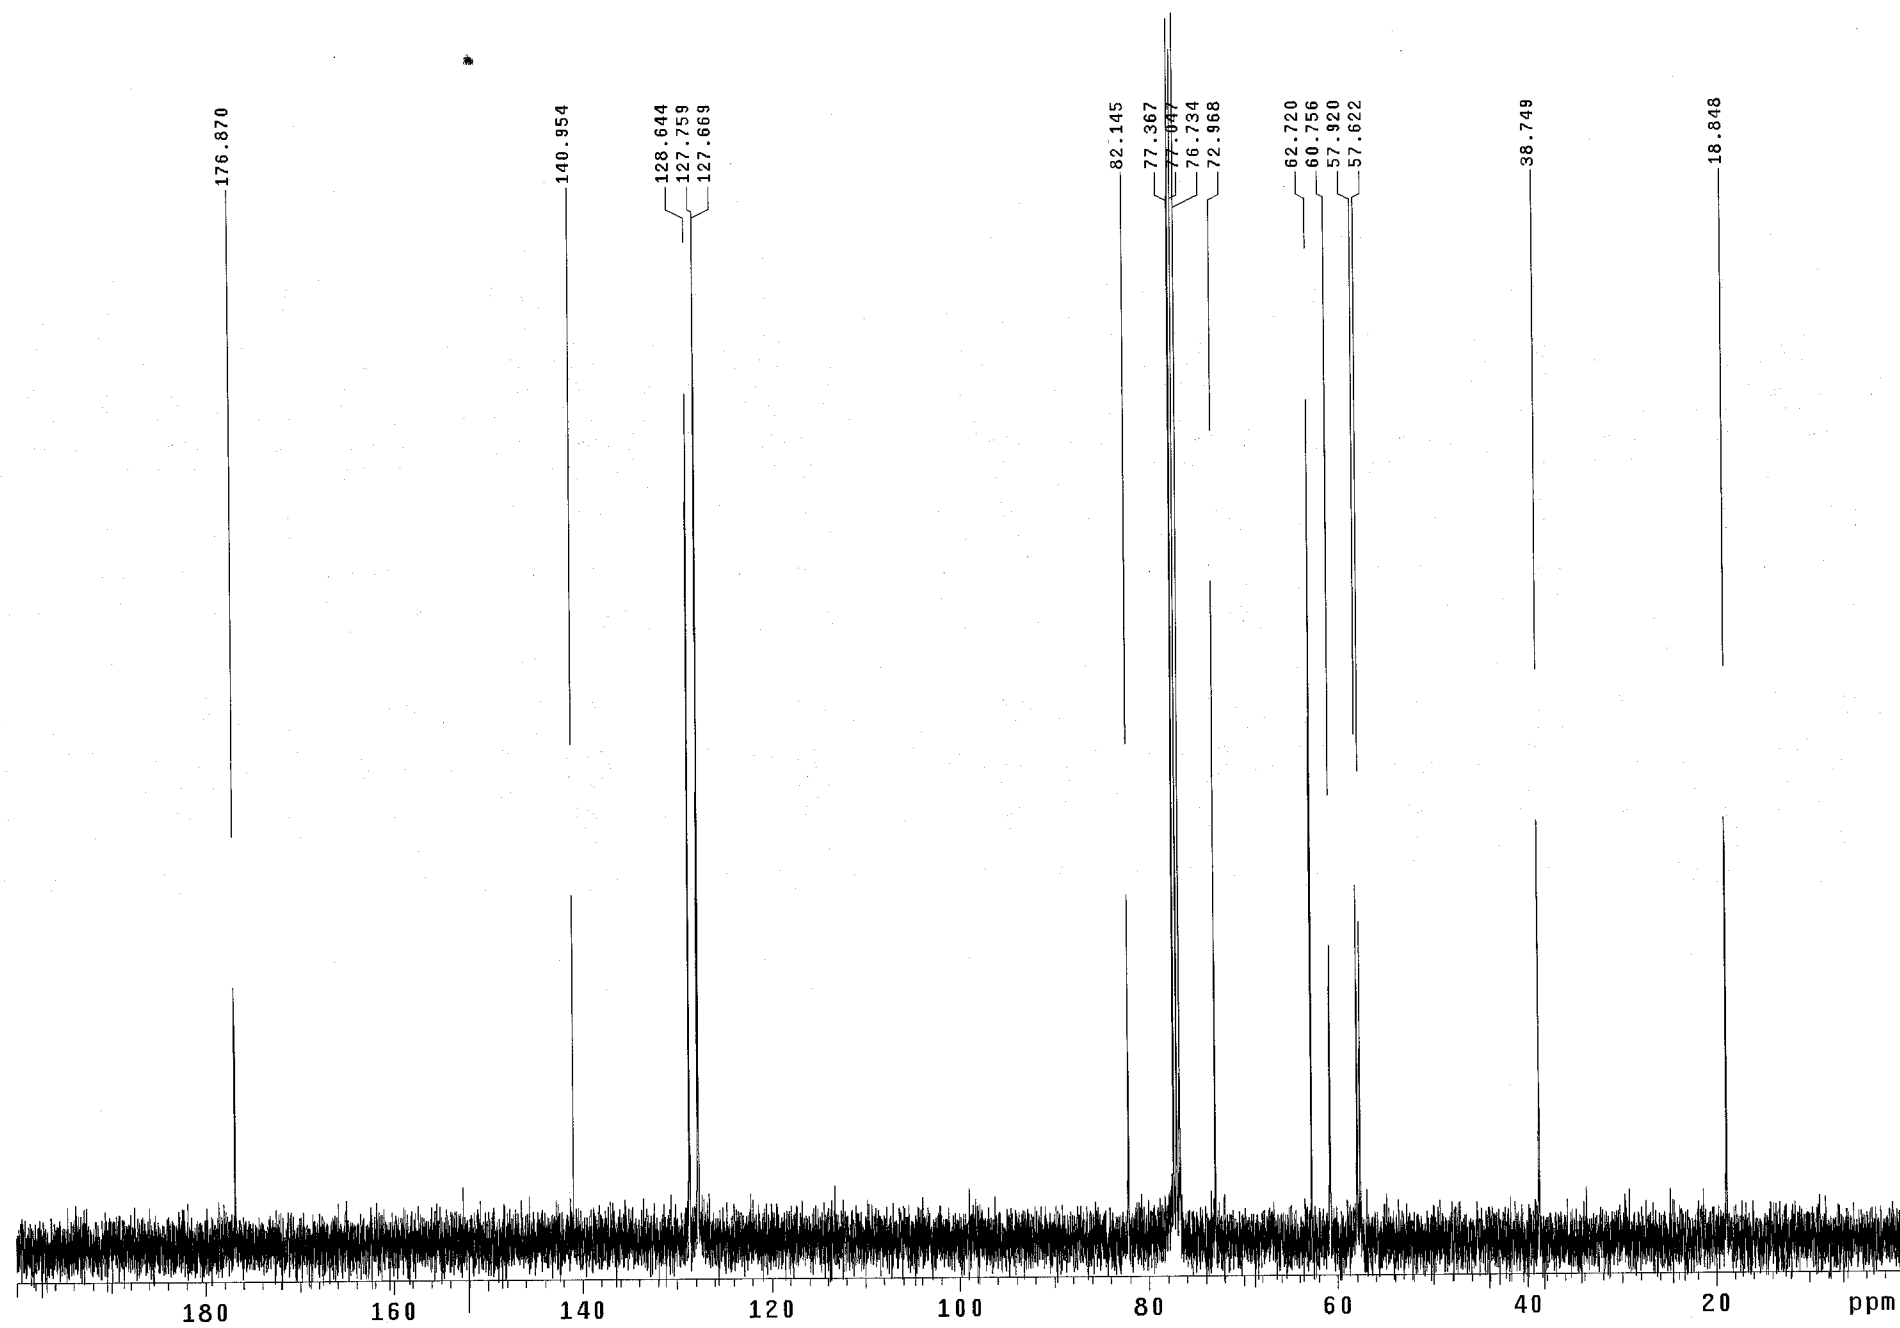

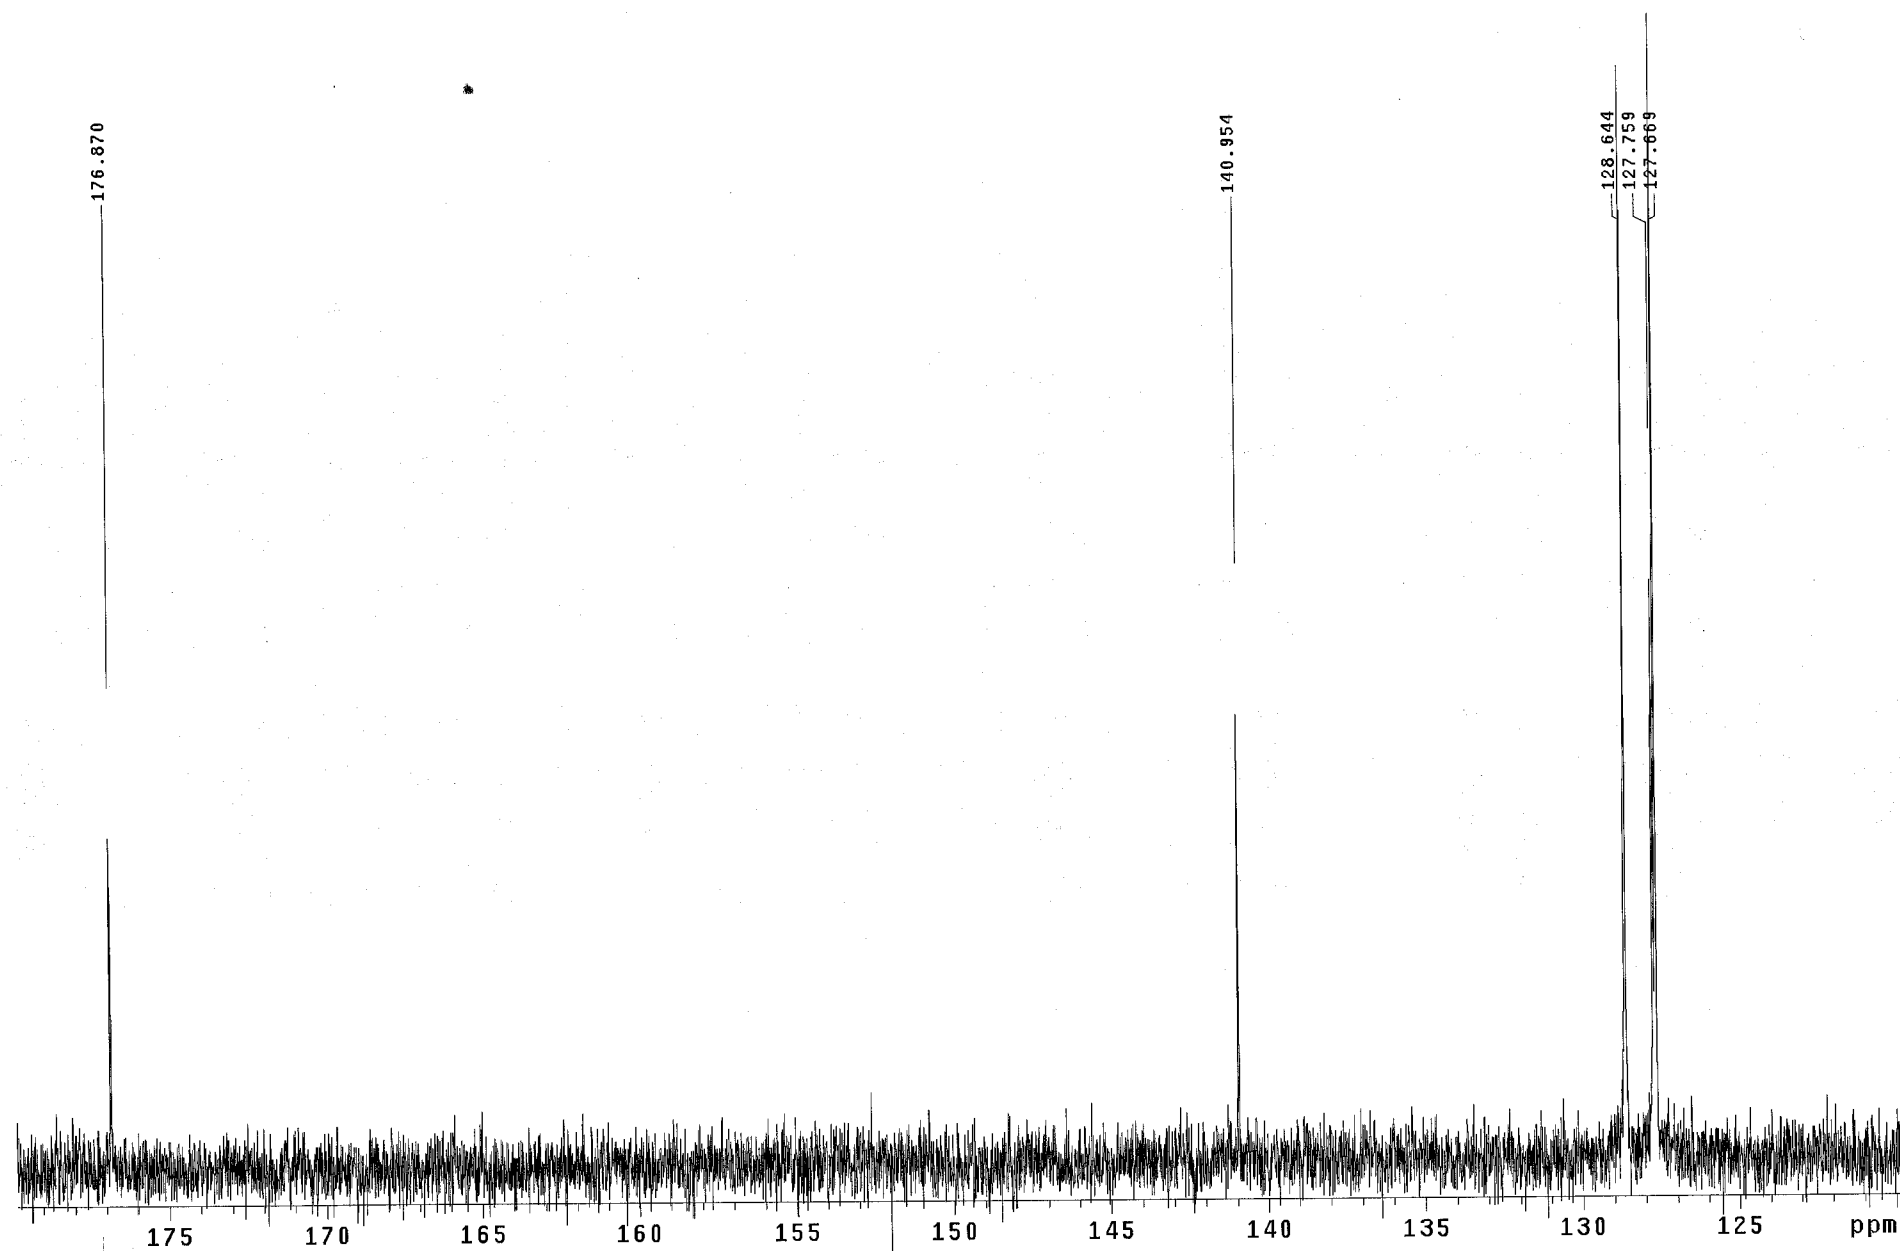

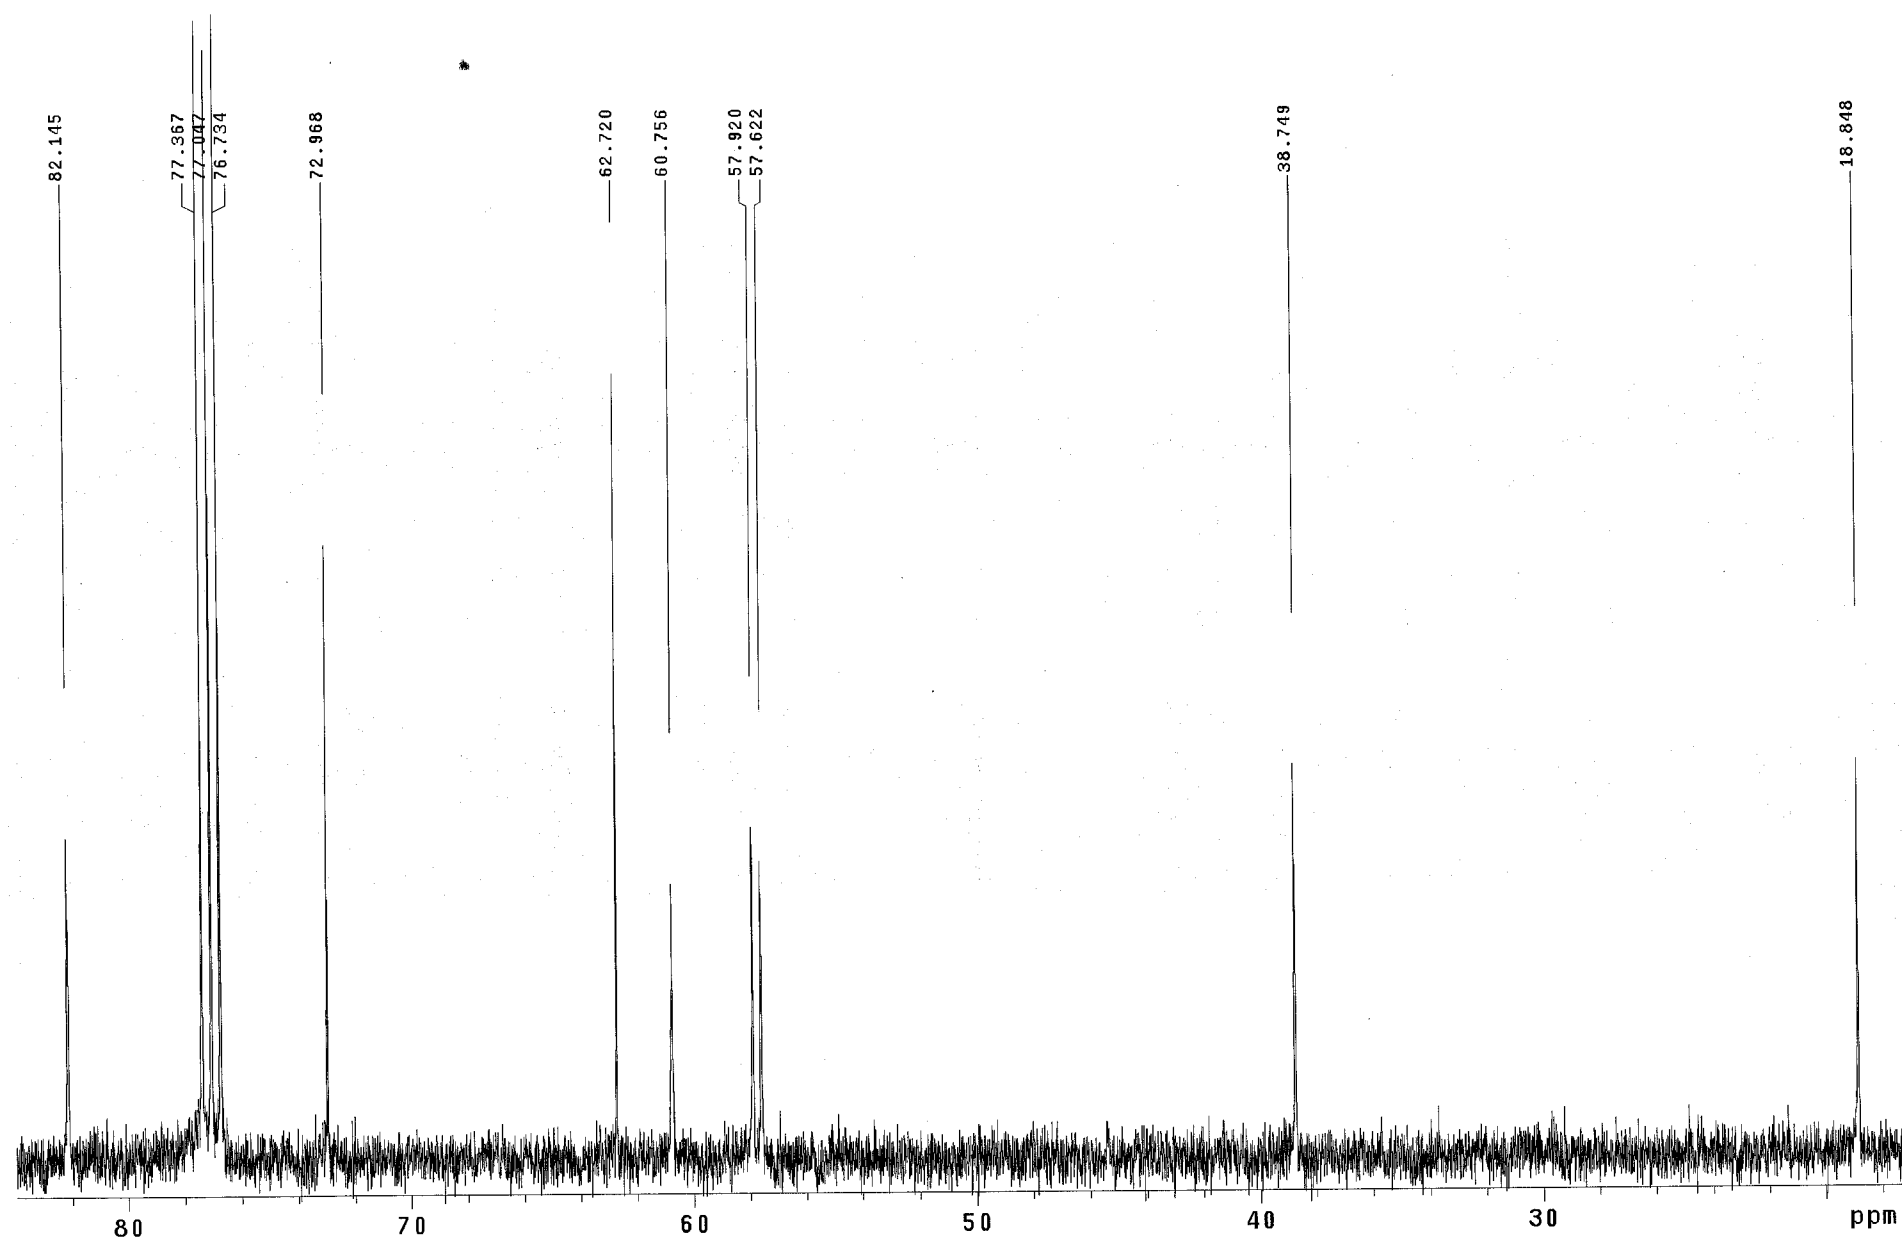



Std proton

File: xp

Pulse Sequence: s2pul

Solvent: cdc13

Ambient temperature

Operator: LWK

VNMR-400 "Varian-NMR"

Relax. delay 1.000 sec  
Pulse 45.0 degrees  
Acq. time 2.049 sec  
Width 6410.3 Hz  
16 repetitions  
OBSERVE H1, 399.7063376 MHz  
DATA PROCESSING  
Resol. enhancement -0.0 Hz  
FT size 65536  
Total time 0 min, 55 sec

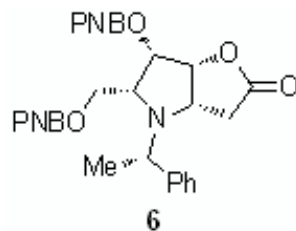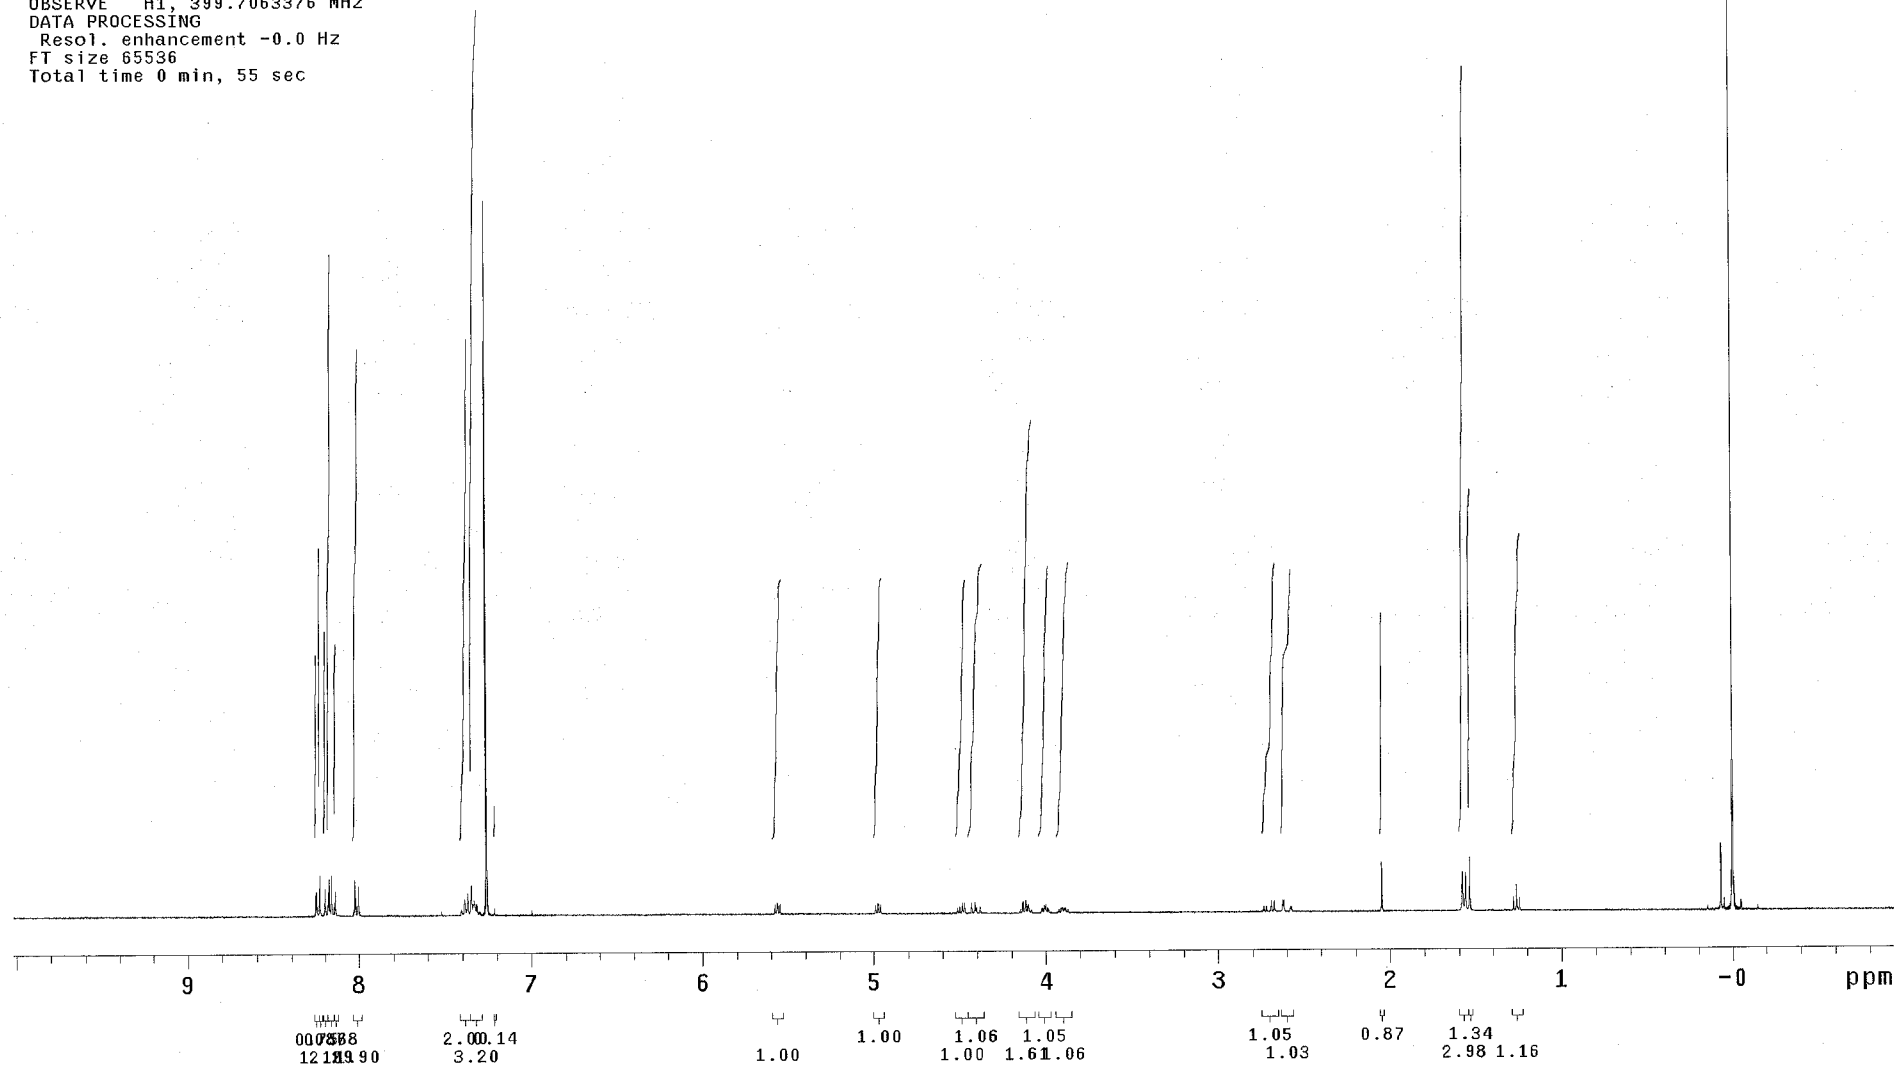

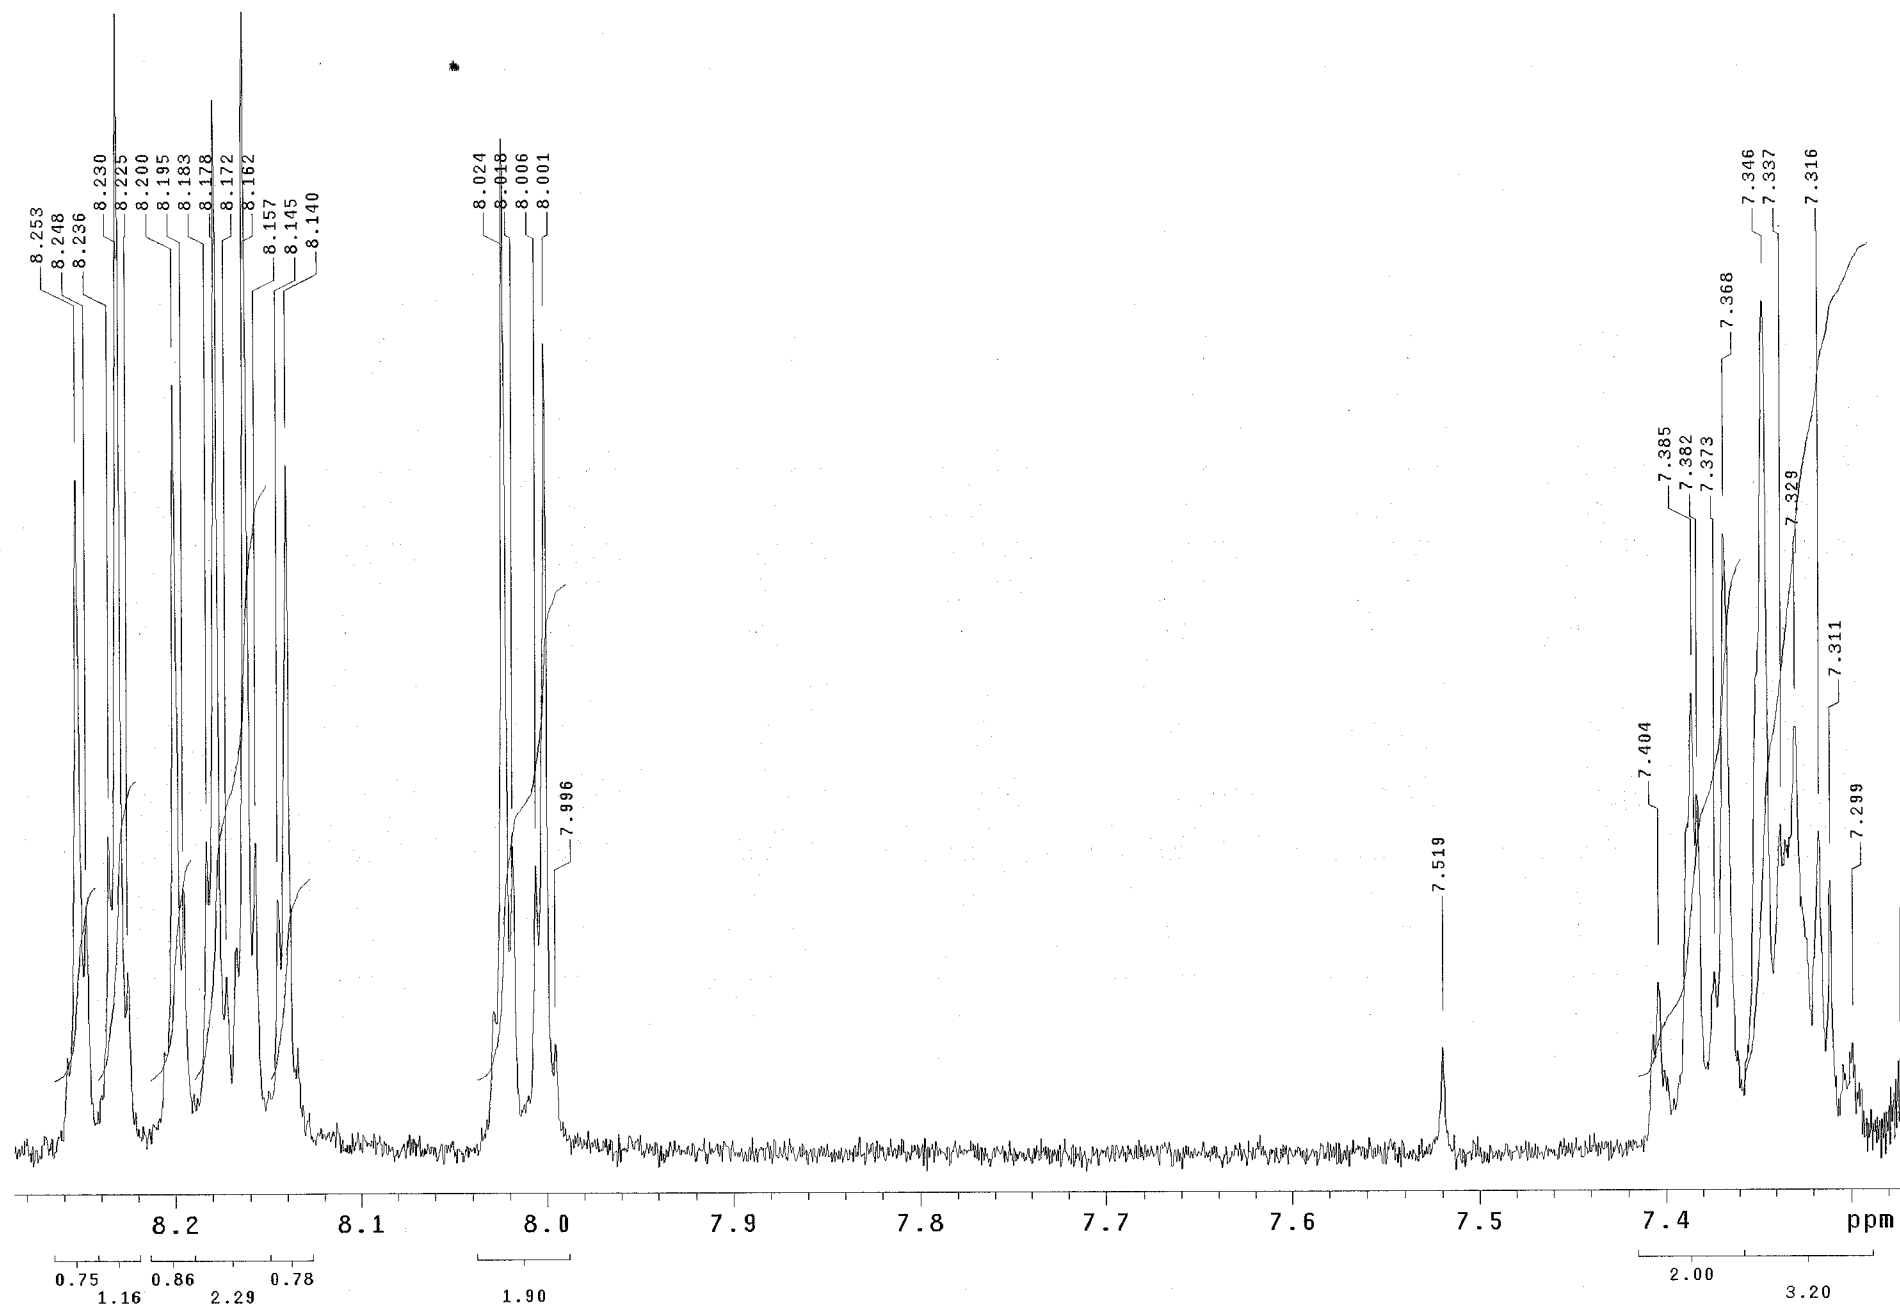

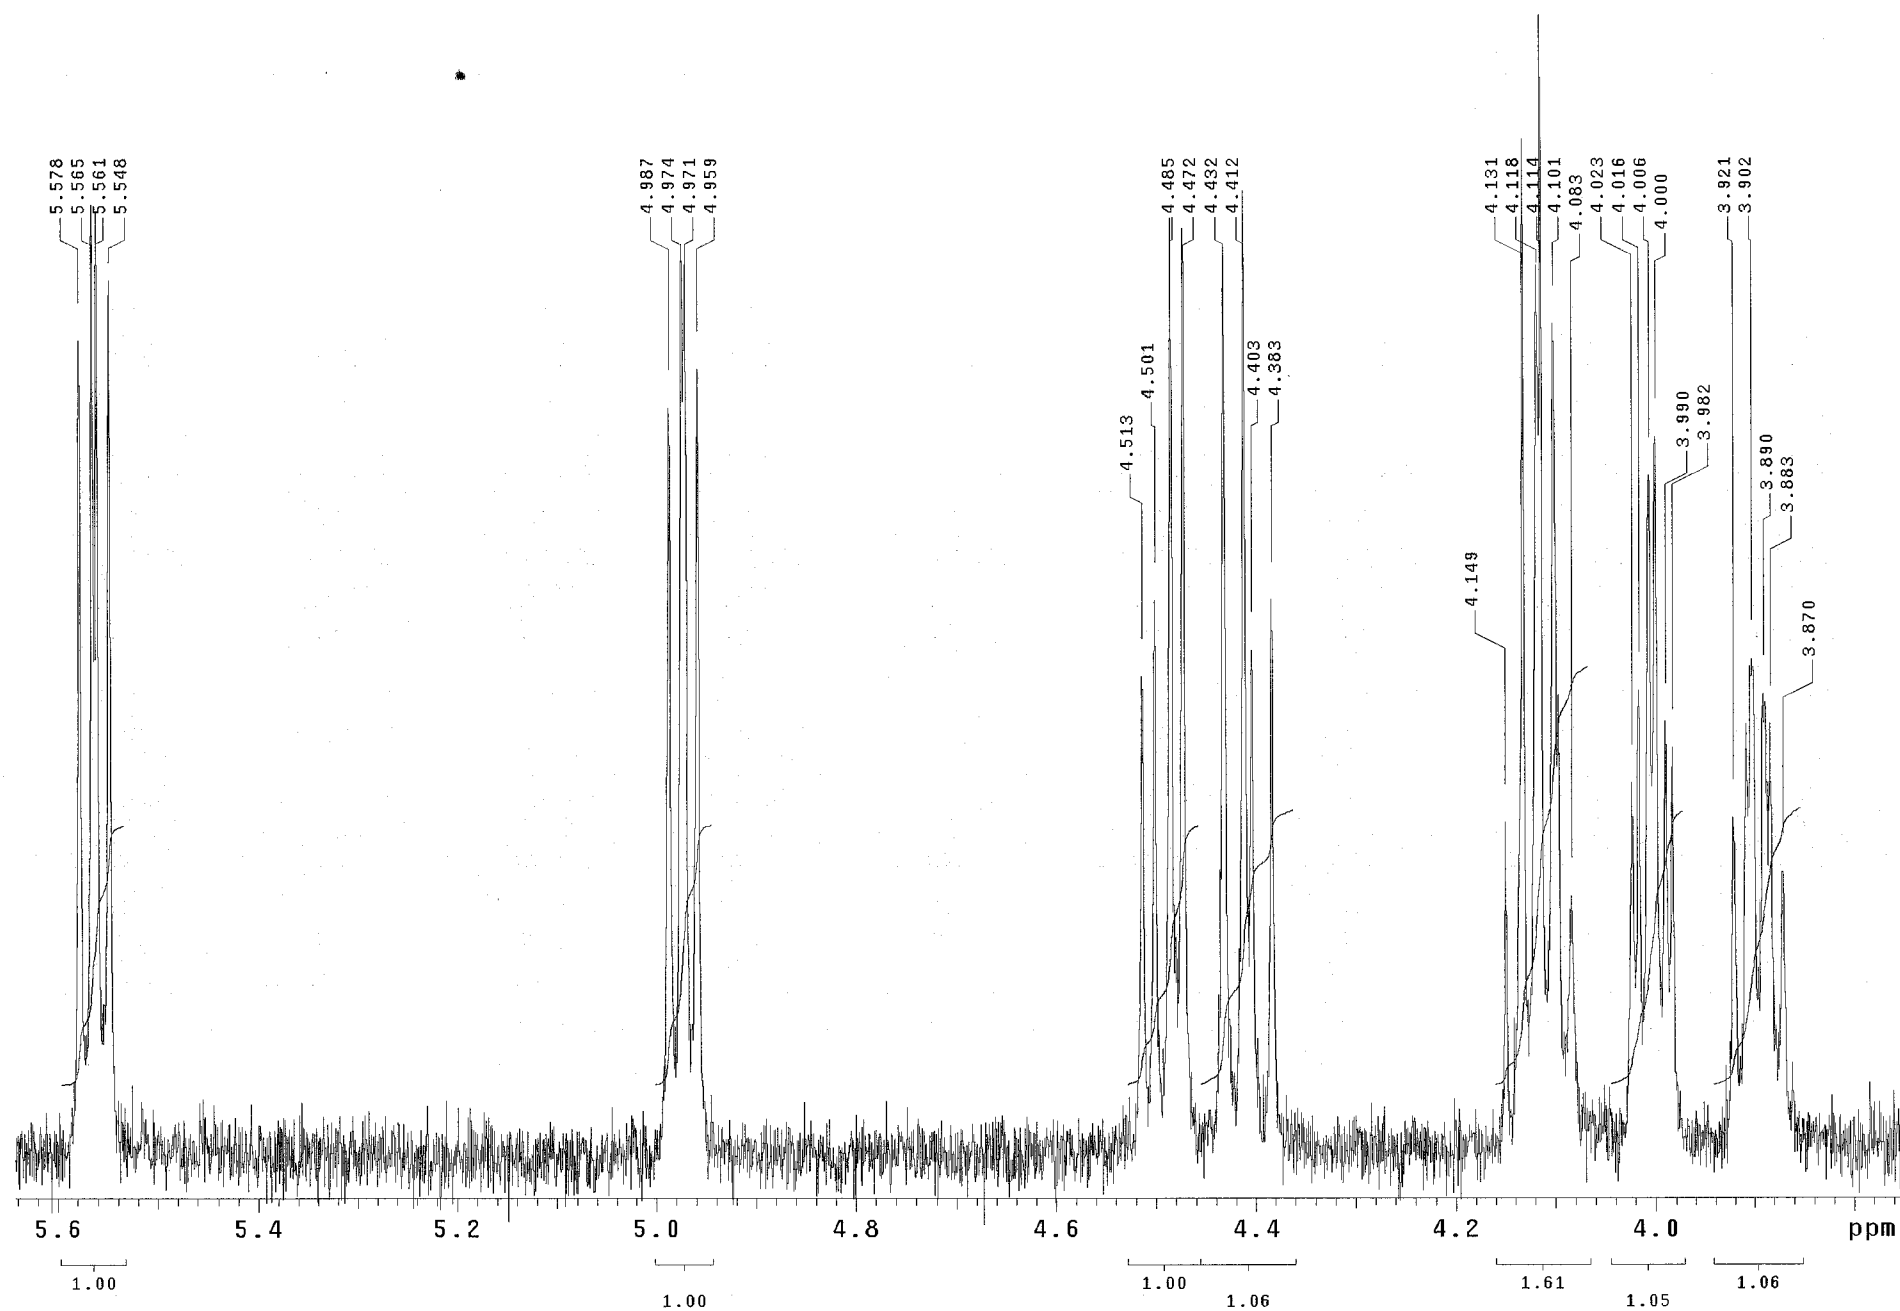

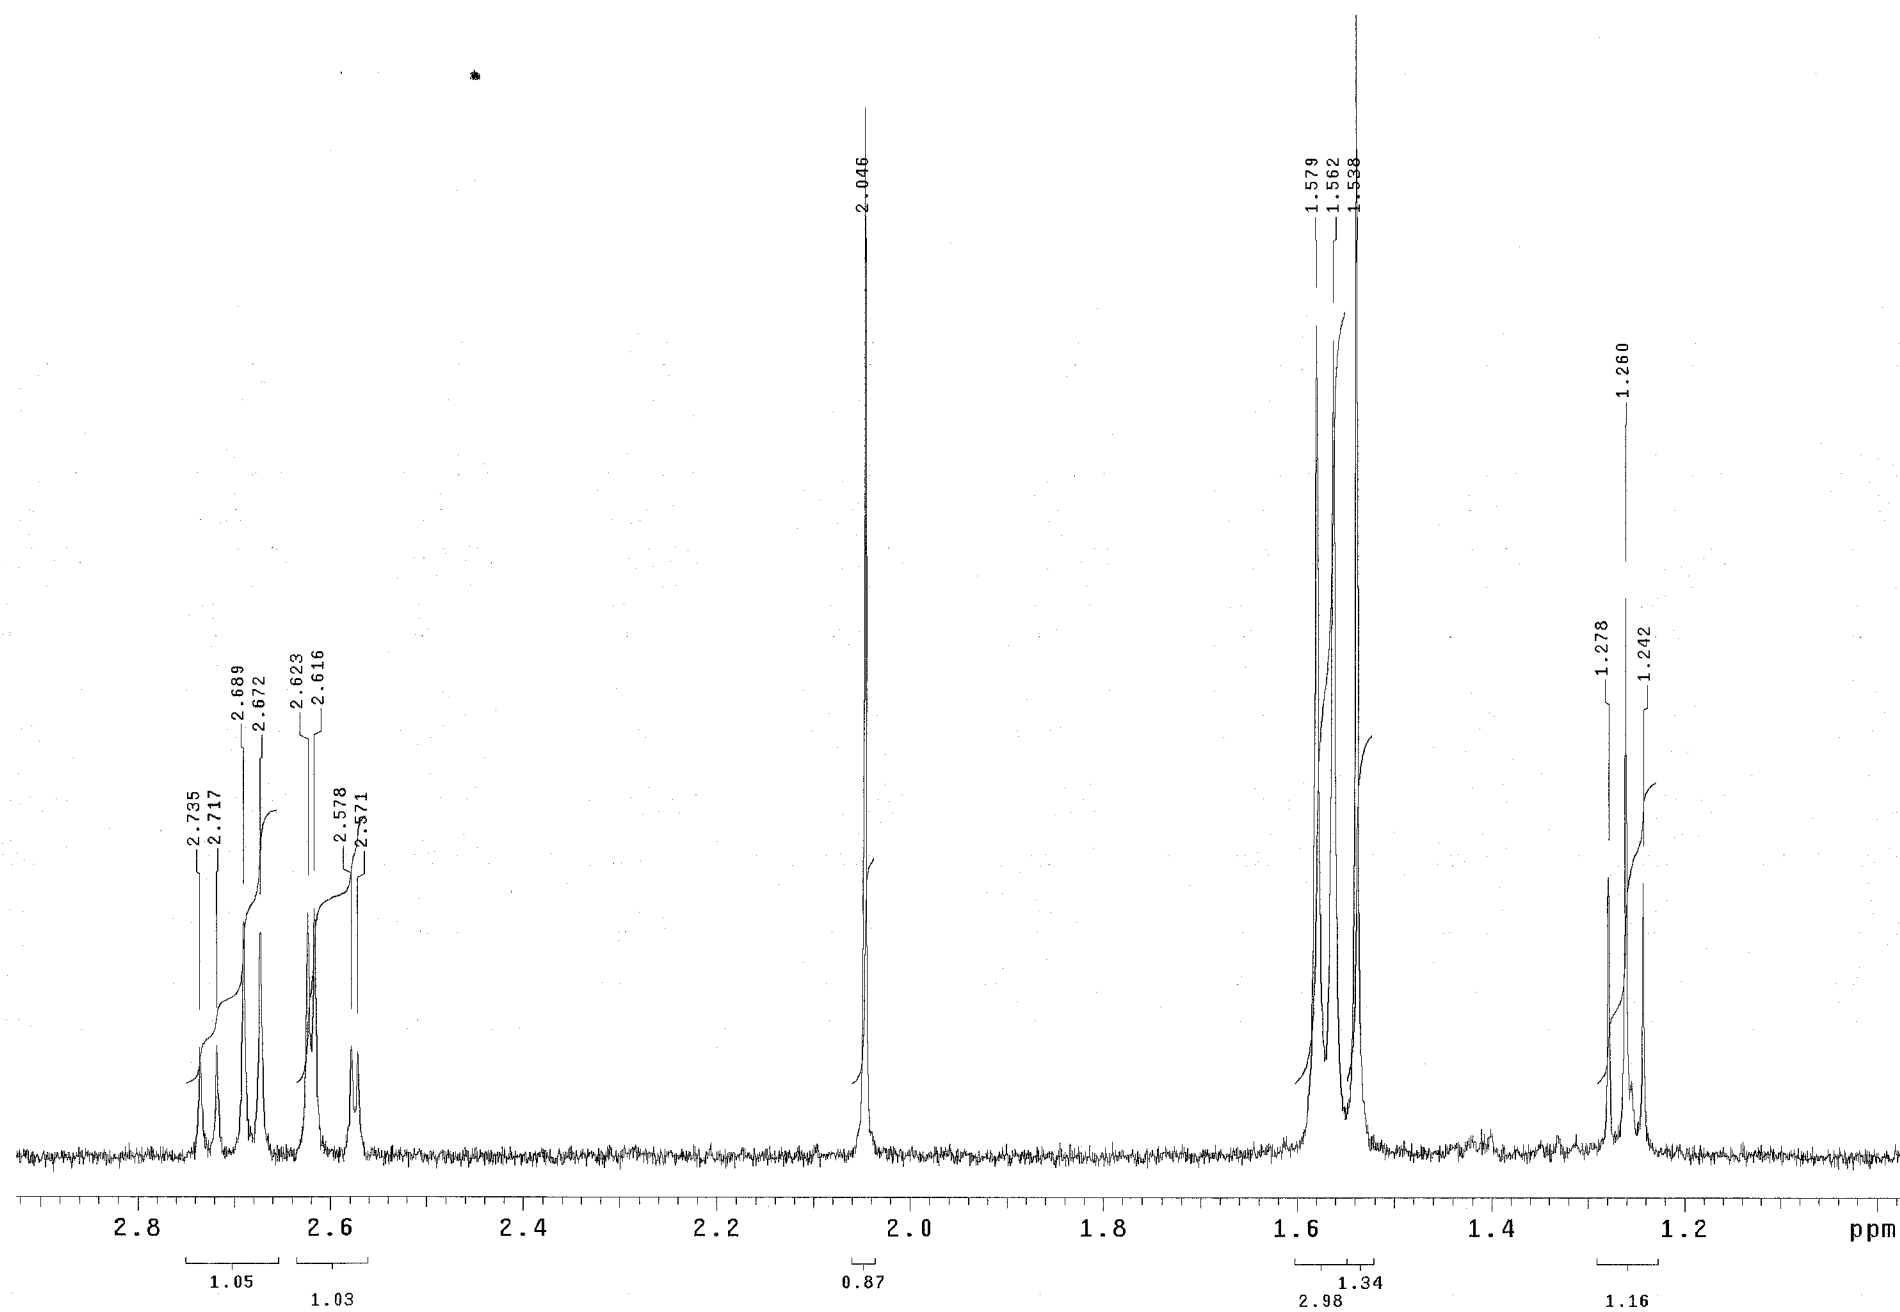

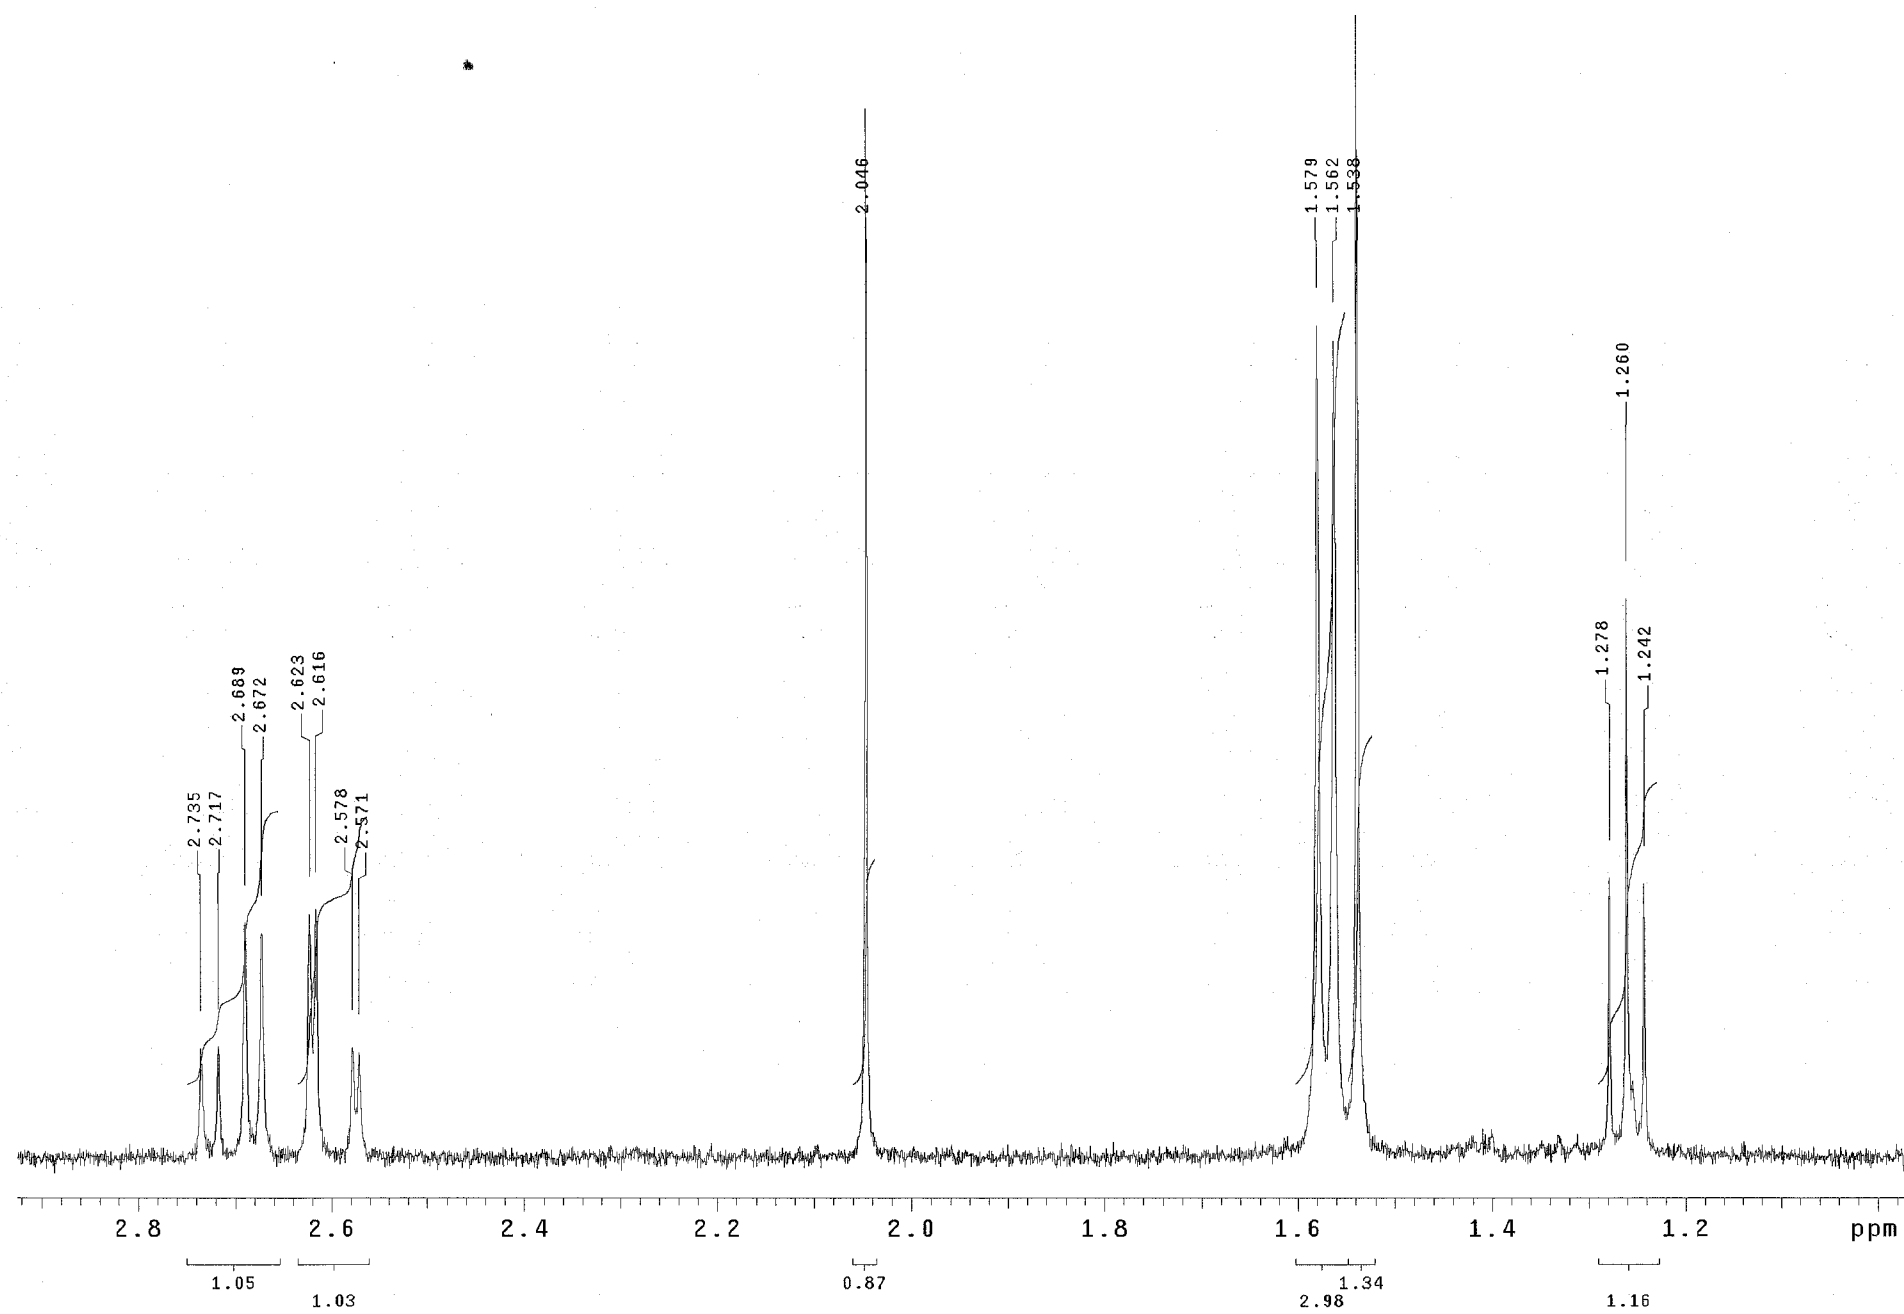

Std carbon

File: xp

Pulse Sequence: s2pu1

Solvent: cdc13

Temp. 25.0 C / 298.1 K

Operator: LWK

VNMRS-400 "Varian-NMR"

Relax. delay 1.000 sec

Pulse 45.0 degrees

Acq. time 1.300 sec

Width 24509.8 Hz

480 repetitions

OBSERVE C13, 100.4988692 MHz

DECOUPLE H1, 399.6790285 MHz

Power 37 dB

continuously on

WALTZ-16 modulated

DATA PROCESSING

Line broadening 0.5 Hz

FT size 65536

Total time 1 hr, 16 min, 41 sec

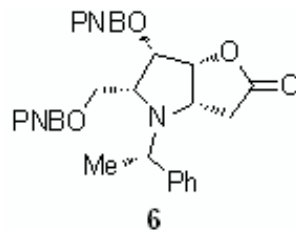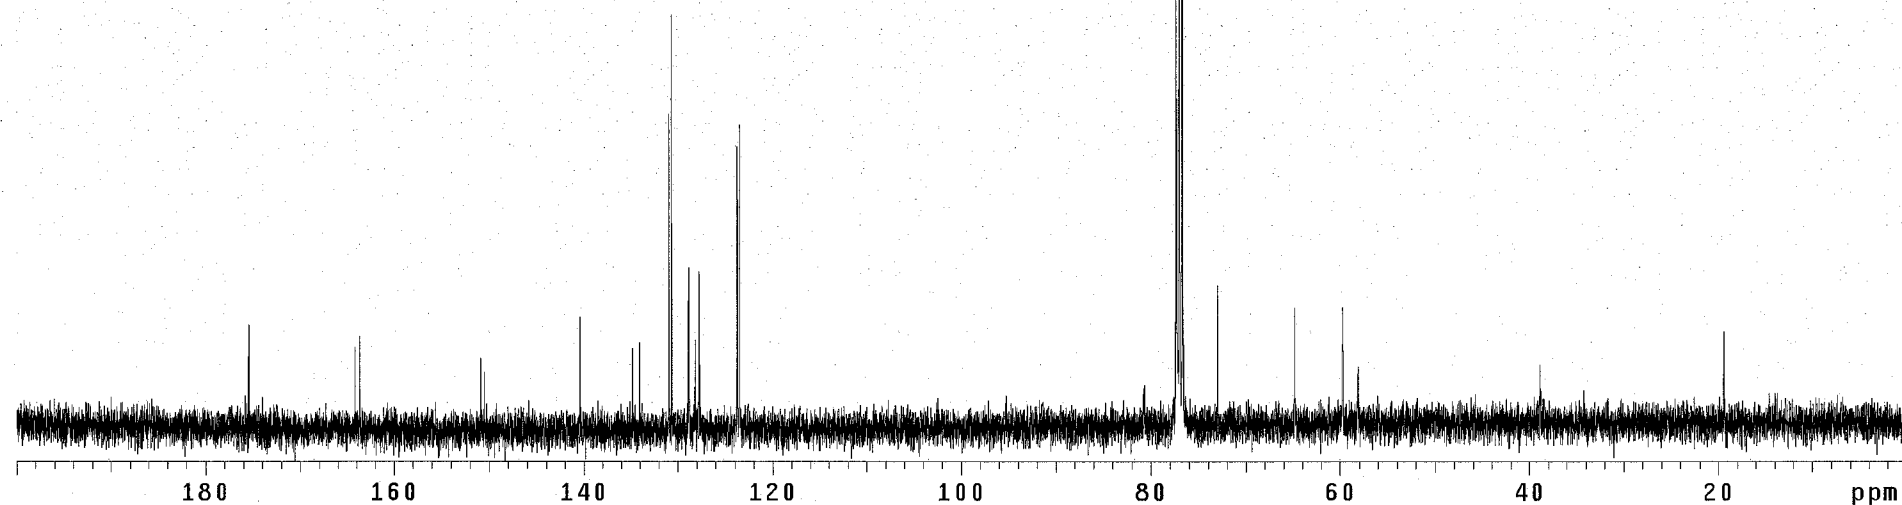

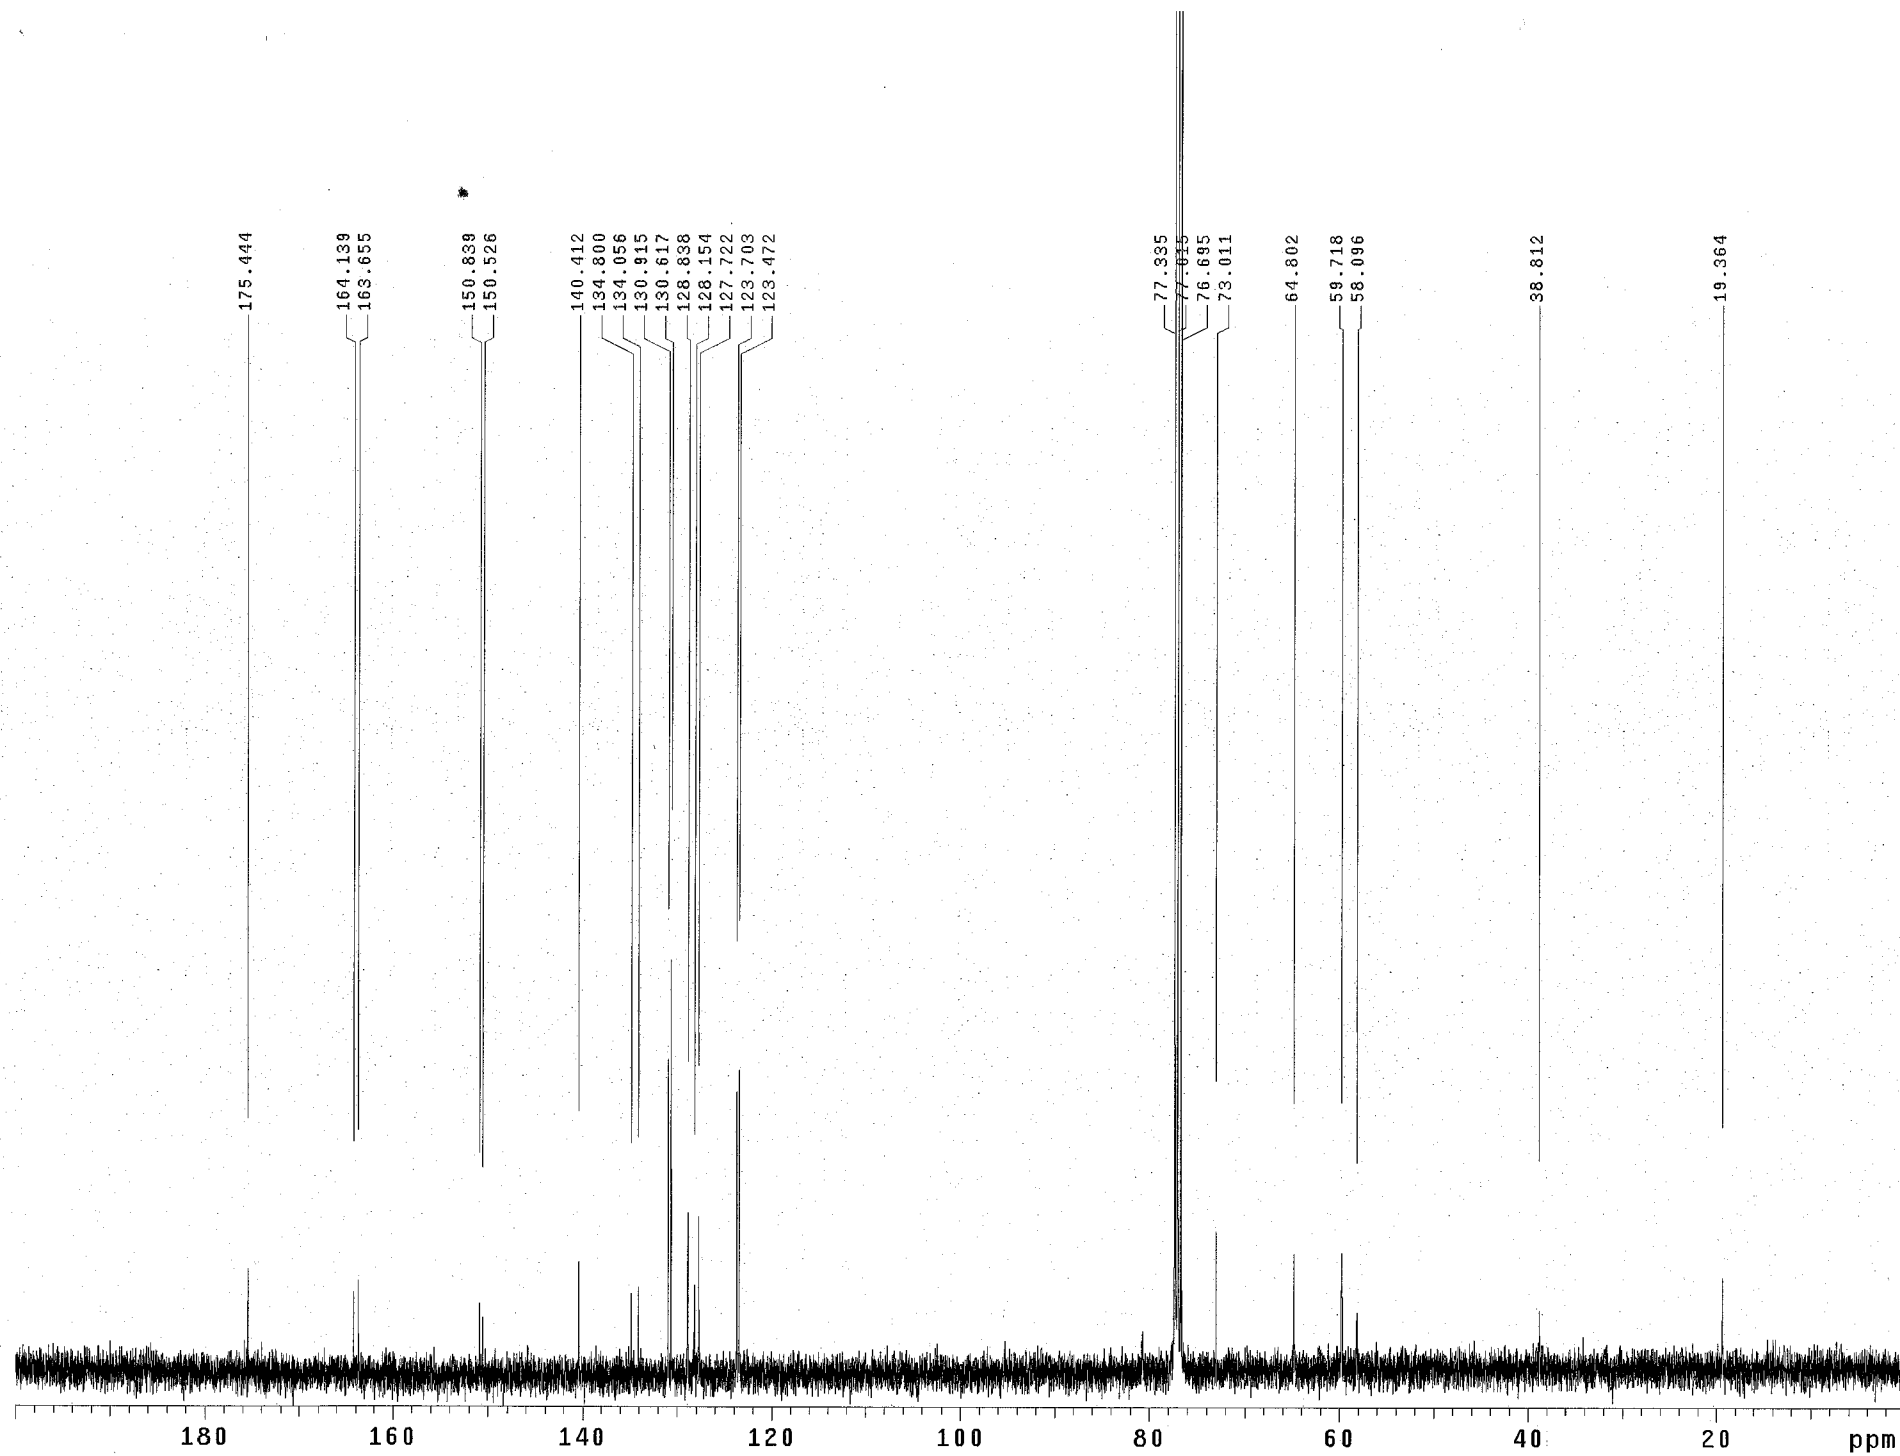

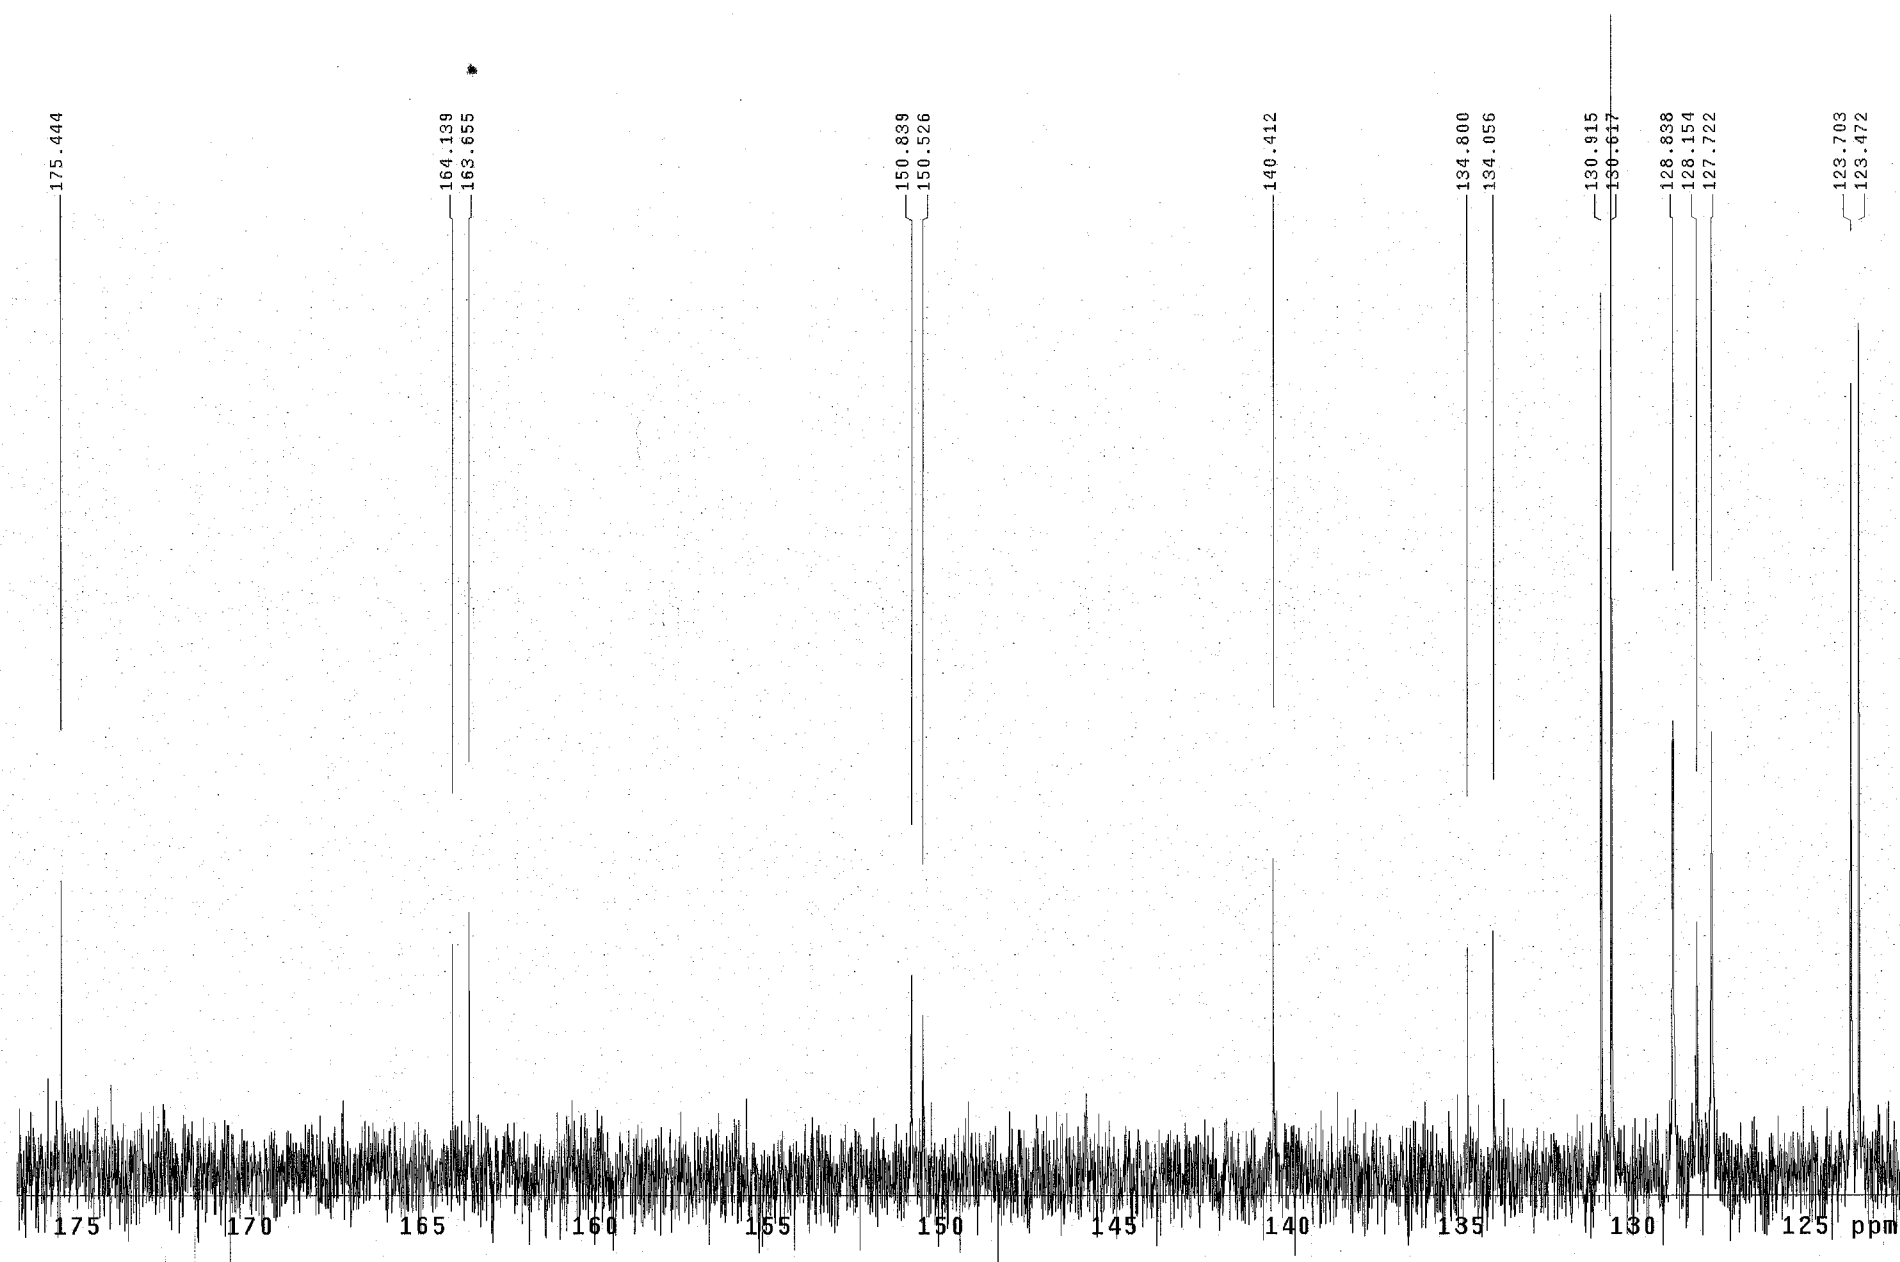



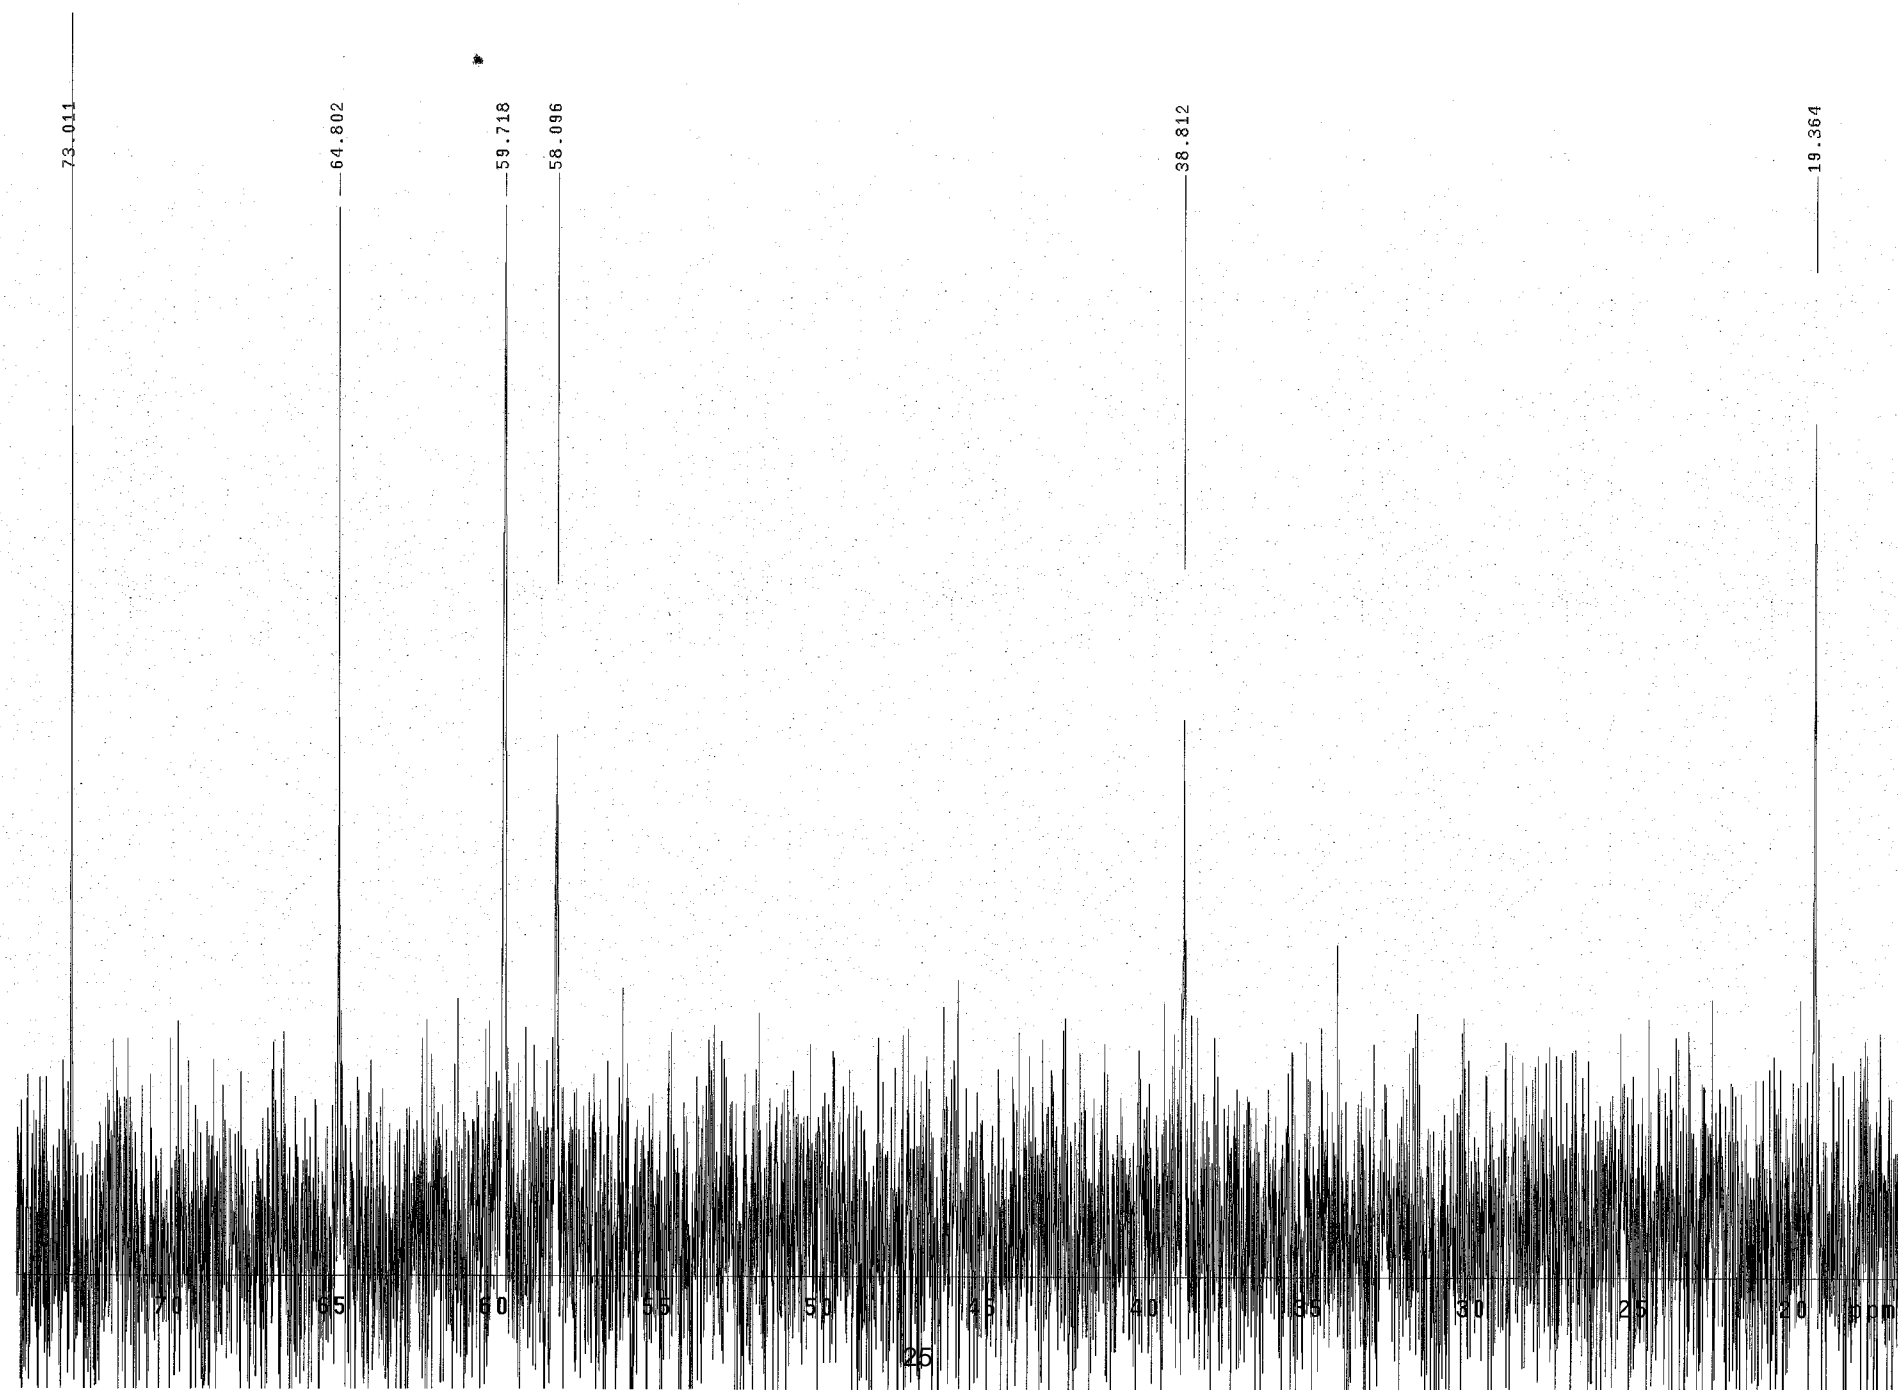

Std proton

File: xp

Pulse Sequence: s2pu1

Solvent: cdc13

Ambient temperature

Operator: LWK

VNMRS-400 "Varian-NMR"

Relax. delay 1.000 sec

Pulse 45.0 degrees

Acq. time 2.049 sec

Width 6410.3 Hz

8 repetitions

OBSERVE H1, 399.7323984 MHz

DATA PROCESSING

Resol. enhancement -0.0 Hz

FT size 65536

Total time 0 min, 30 sec

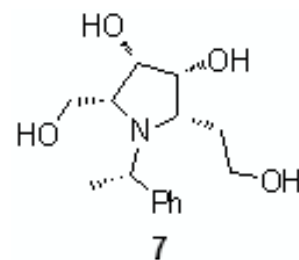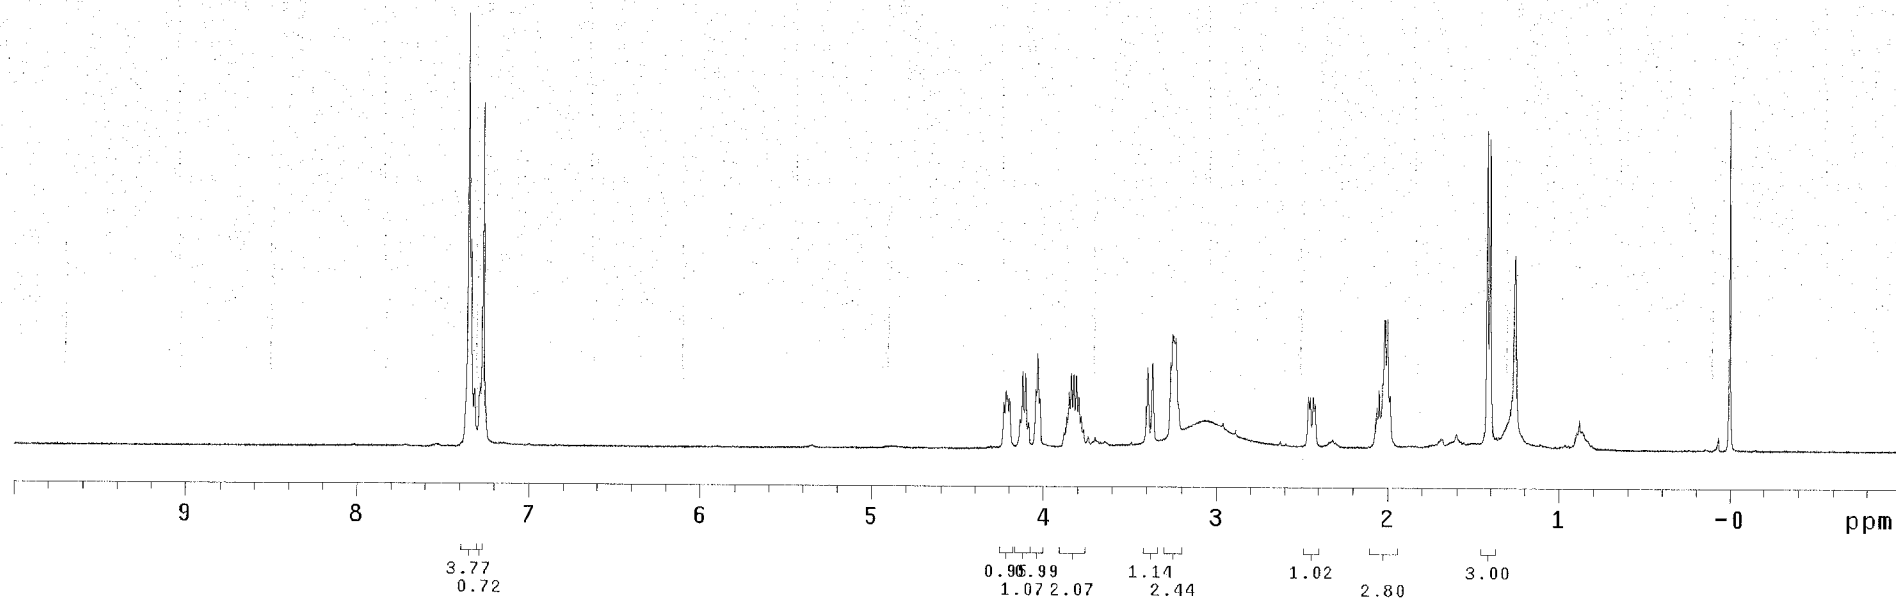

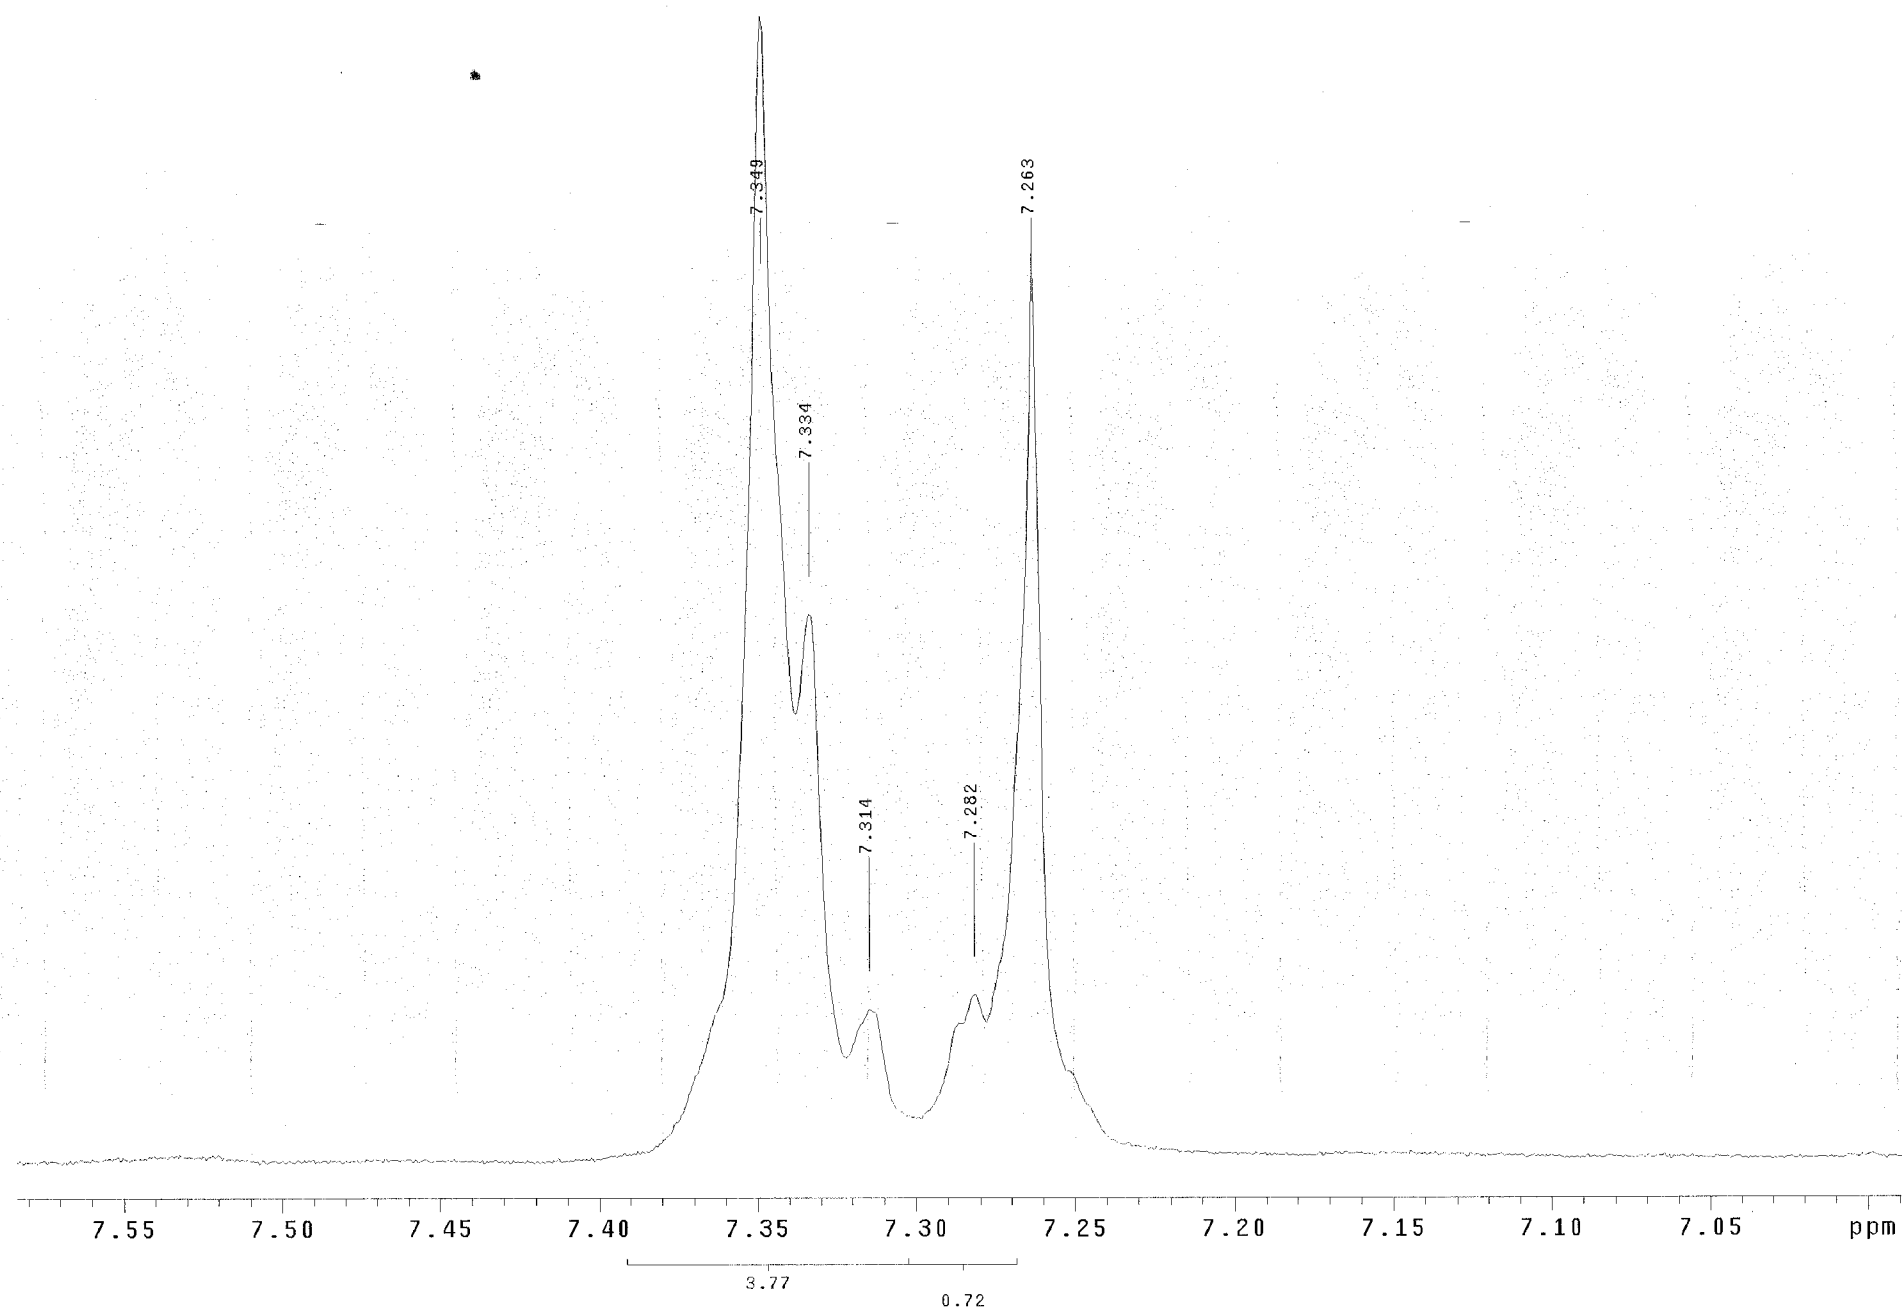

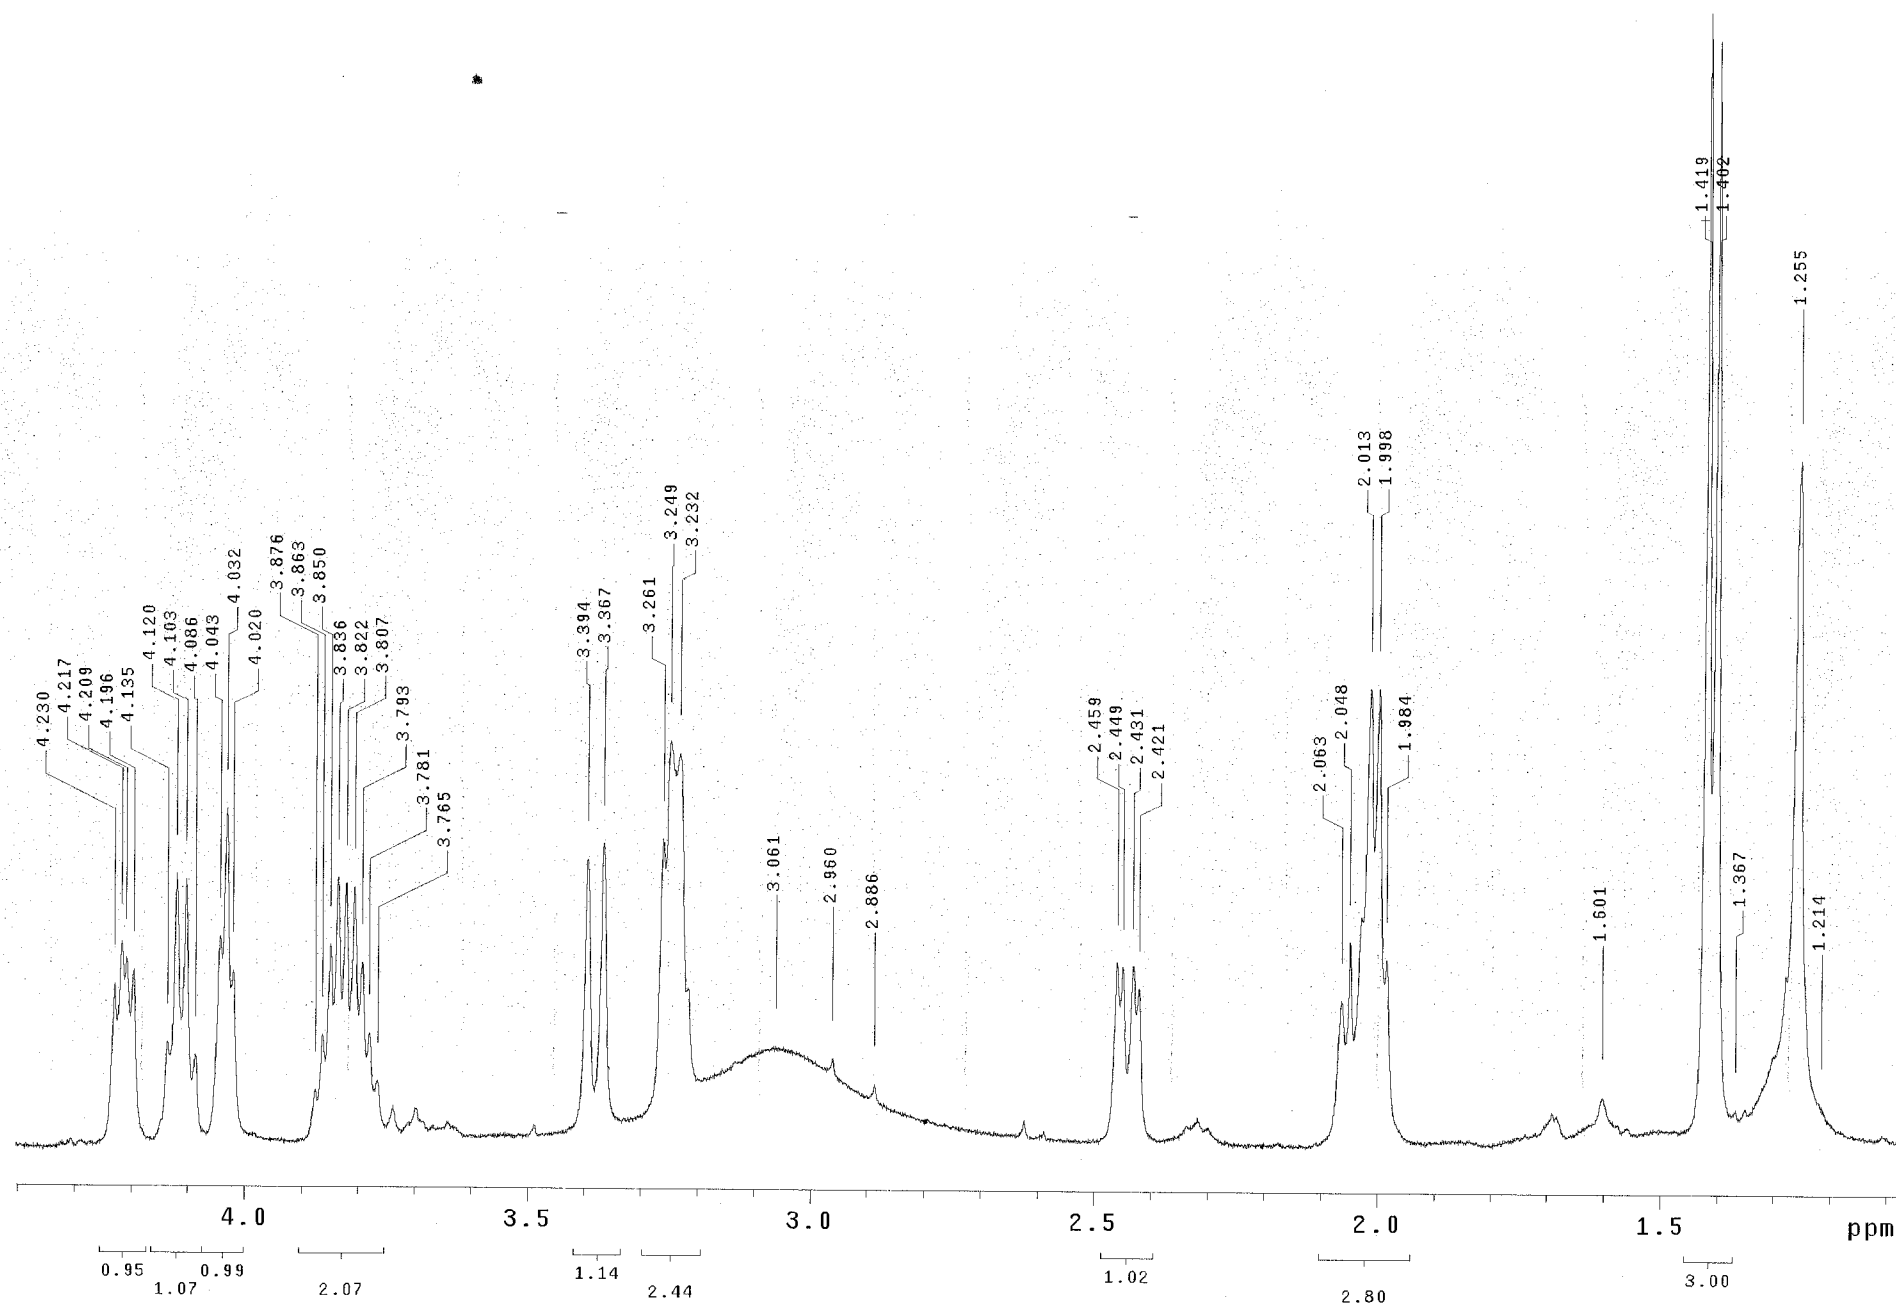

Std carbon

File: xp

Pulse Sequence: s2pu1

Solvent: cdc13

Ambient temperature

Operator: LWK

VNMRS-400 "Varian-NMR"

Relax. delay 1.000 sec

Pulse 45.0 degrees

Acq. time 1.300 sec

Width 24509.8 Hz

172 repetitions

OBSERVE C13, 100.5095164 MHz

DECOUPLE H1, 399.7213720 MHz

Power 37 dB

continuously on

WALTZ-16 modulated

DATA PROCESSING

Line broadening 0.5 Hz

FT size 65536

Total time 1 hr, 16 min, 41 sec

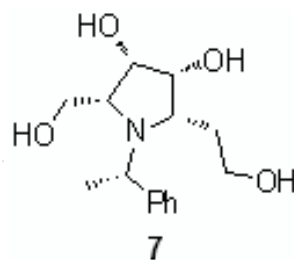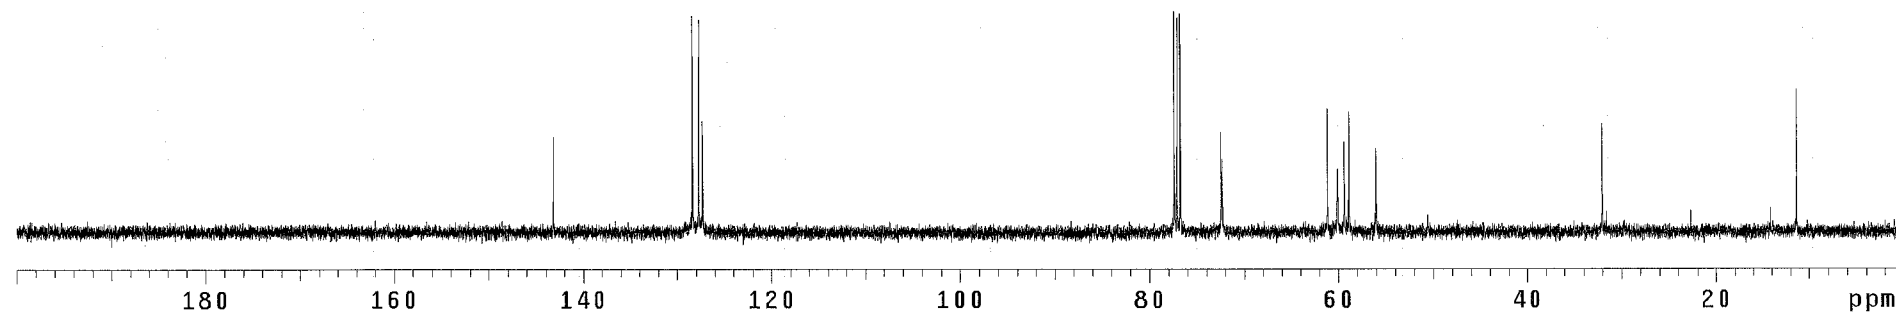

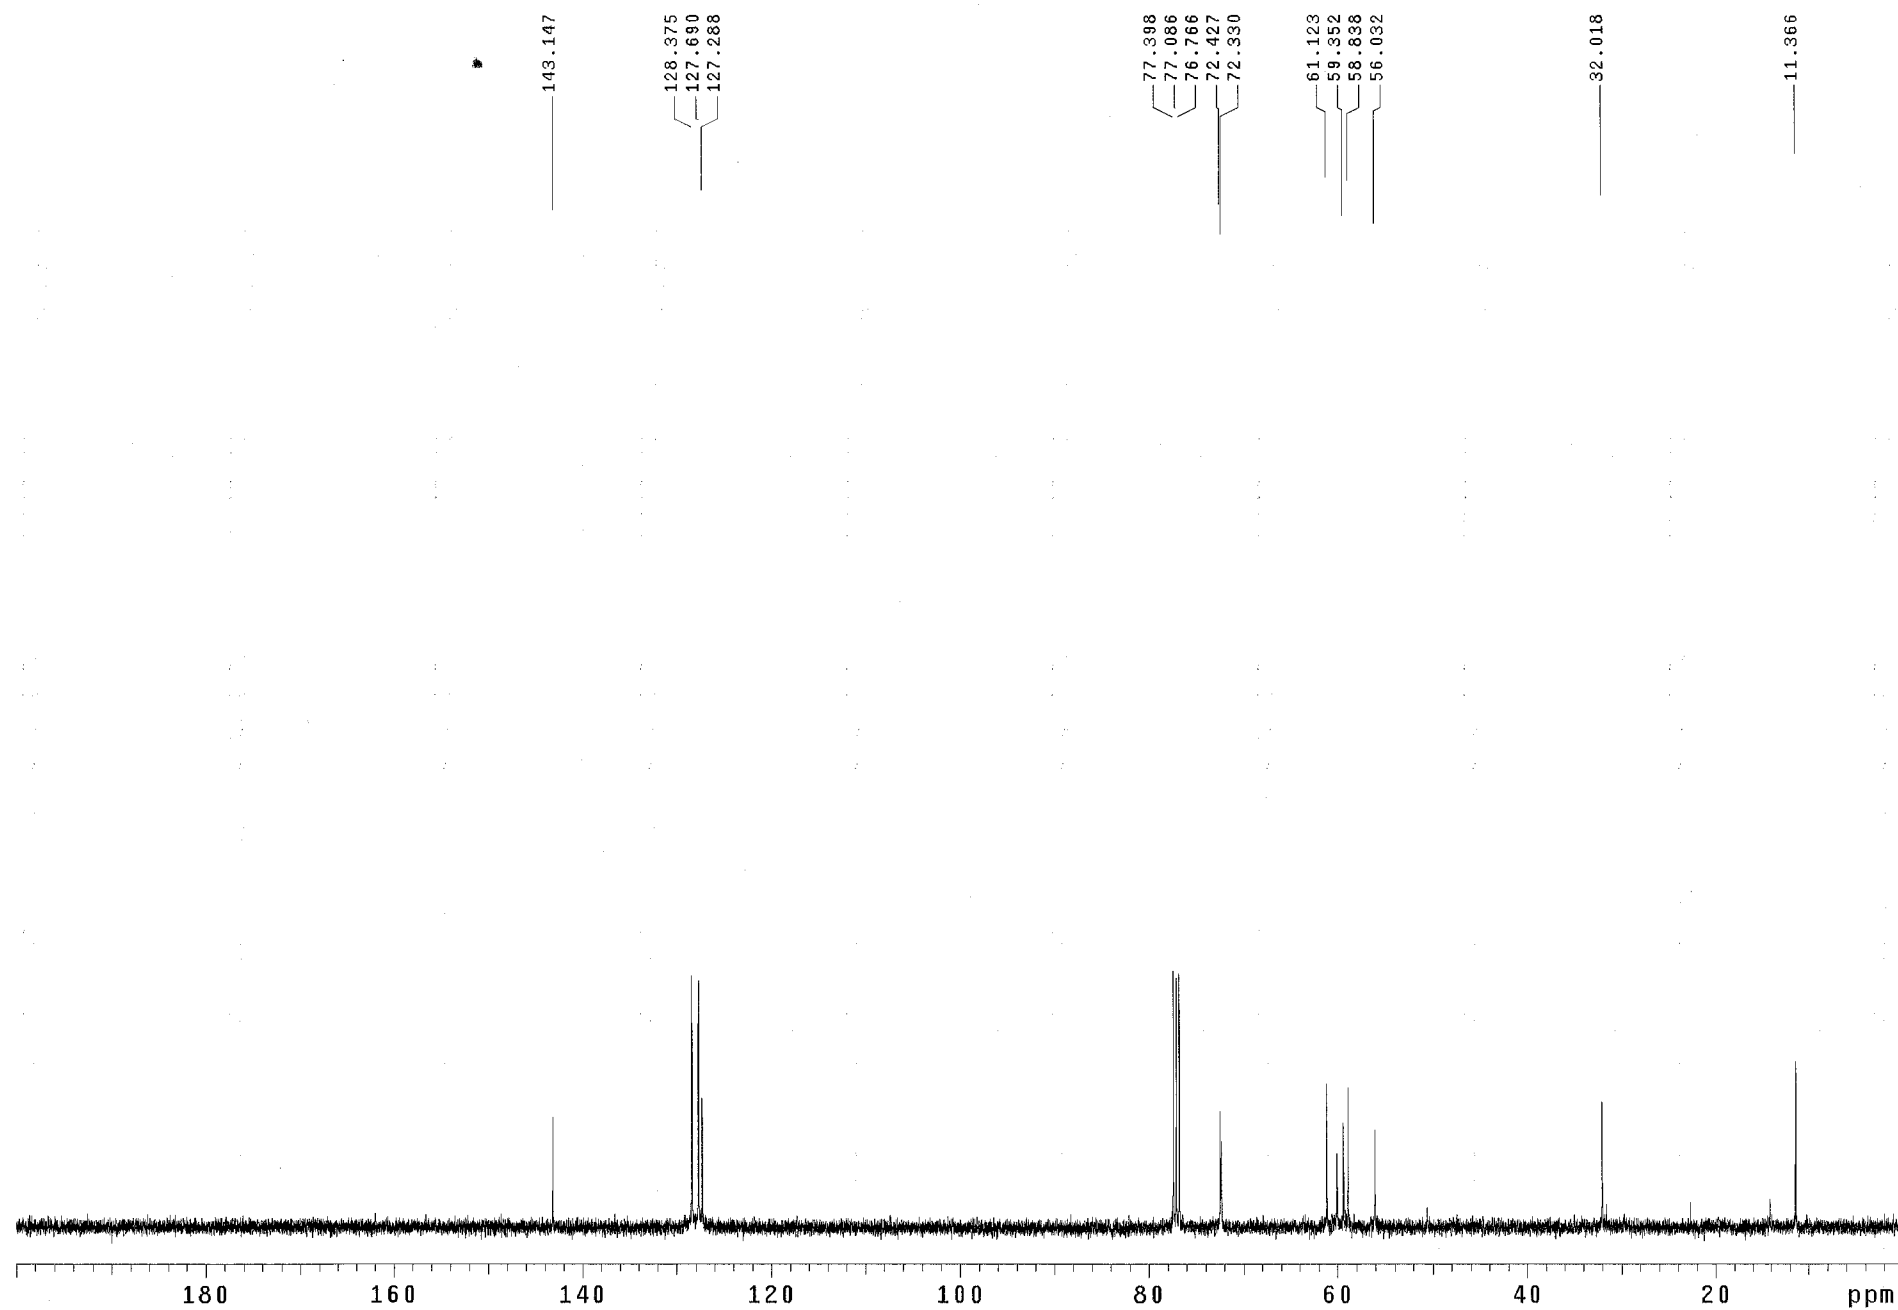

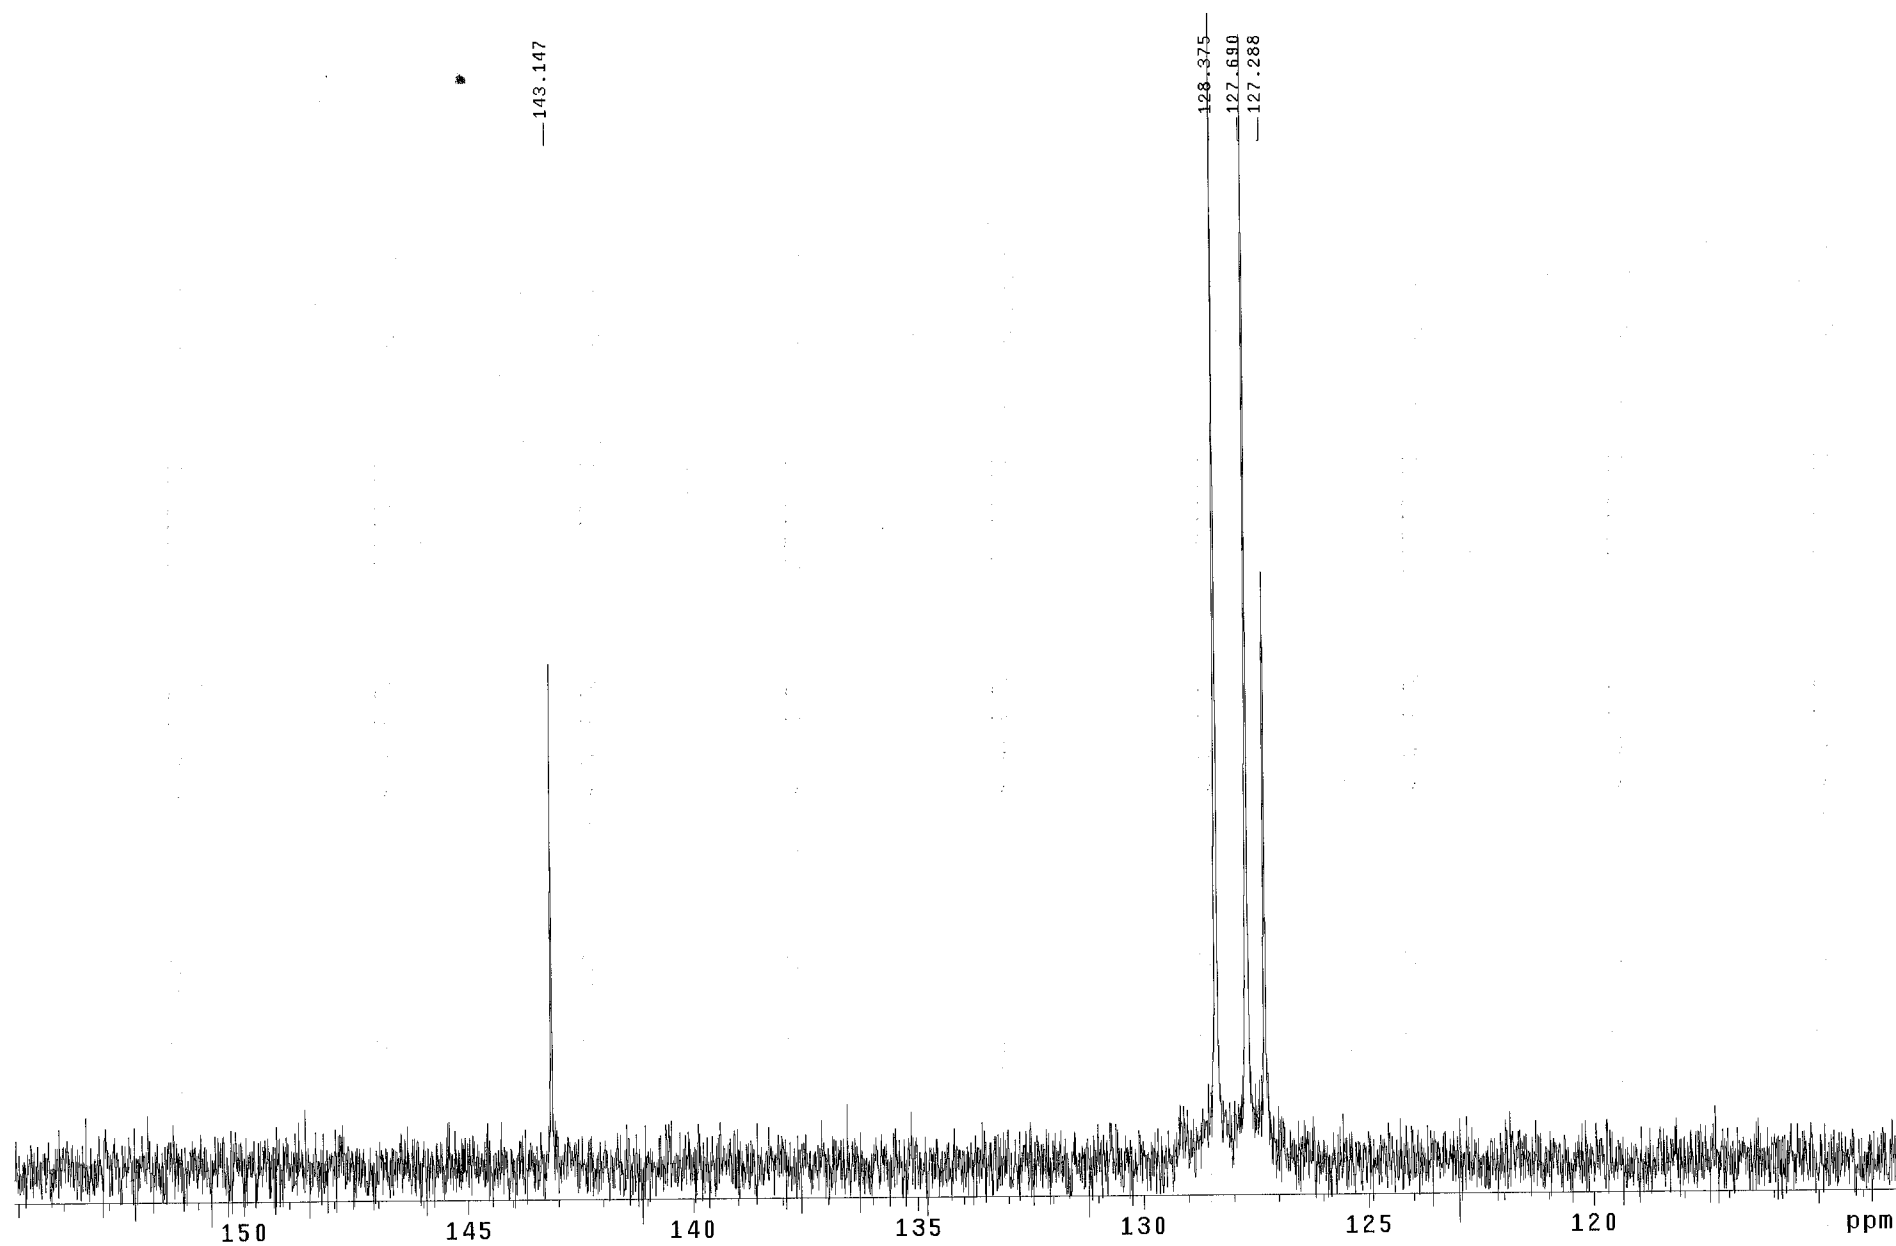

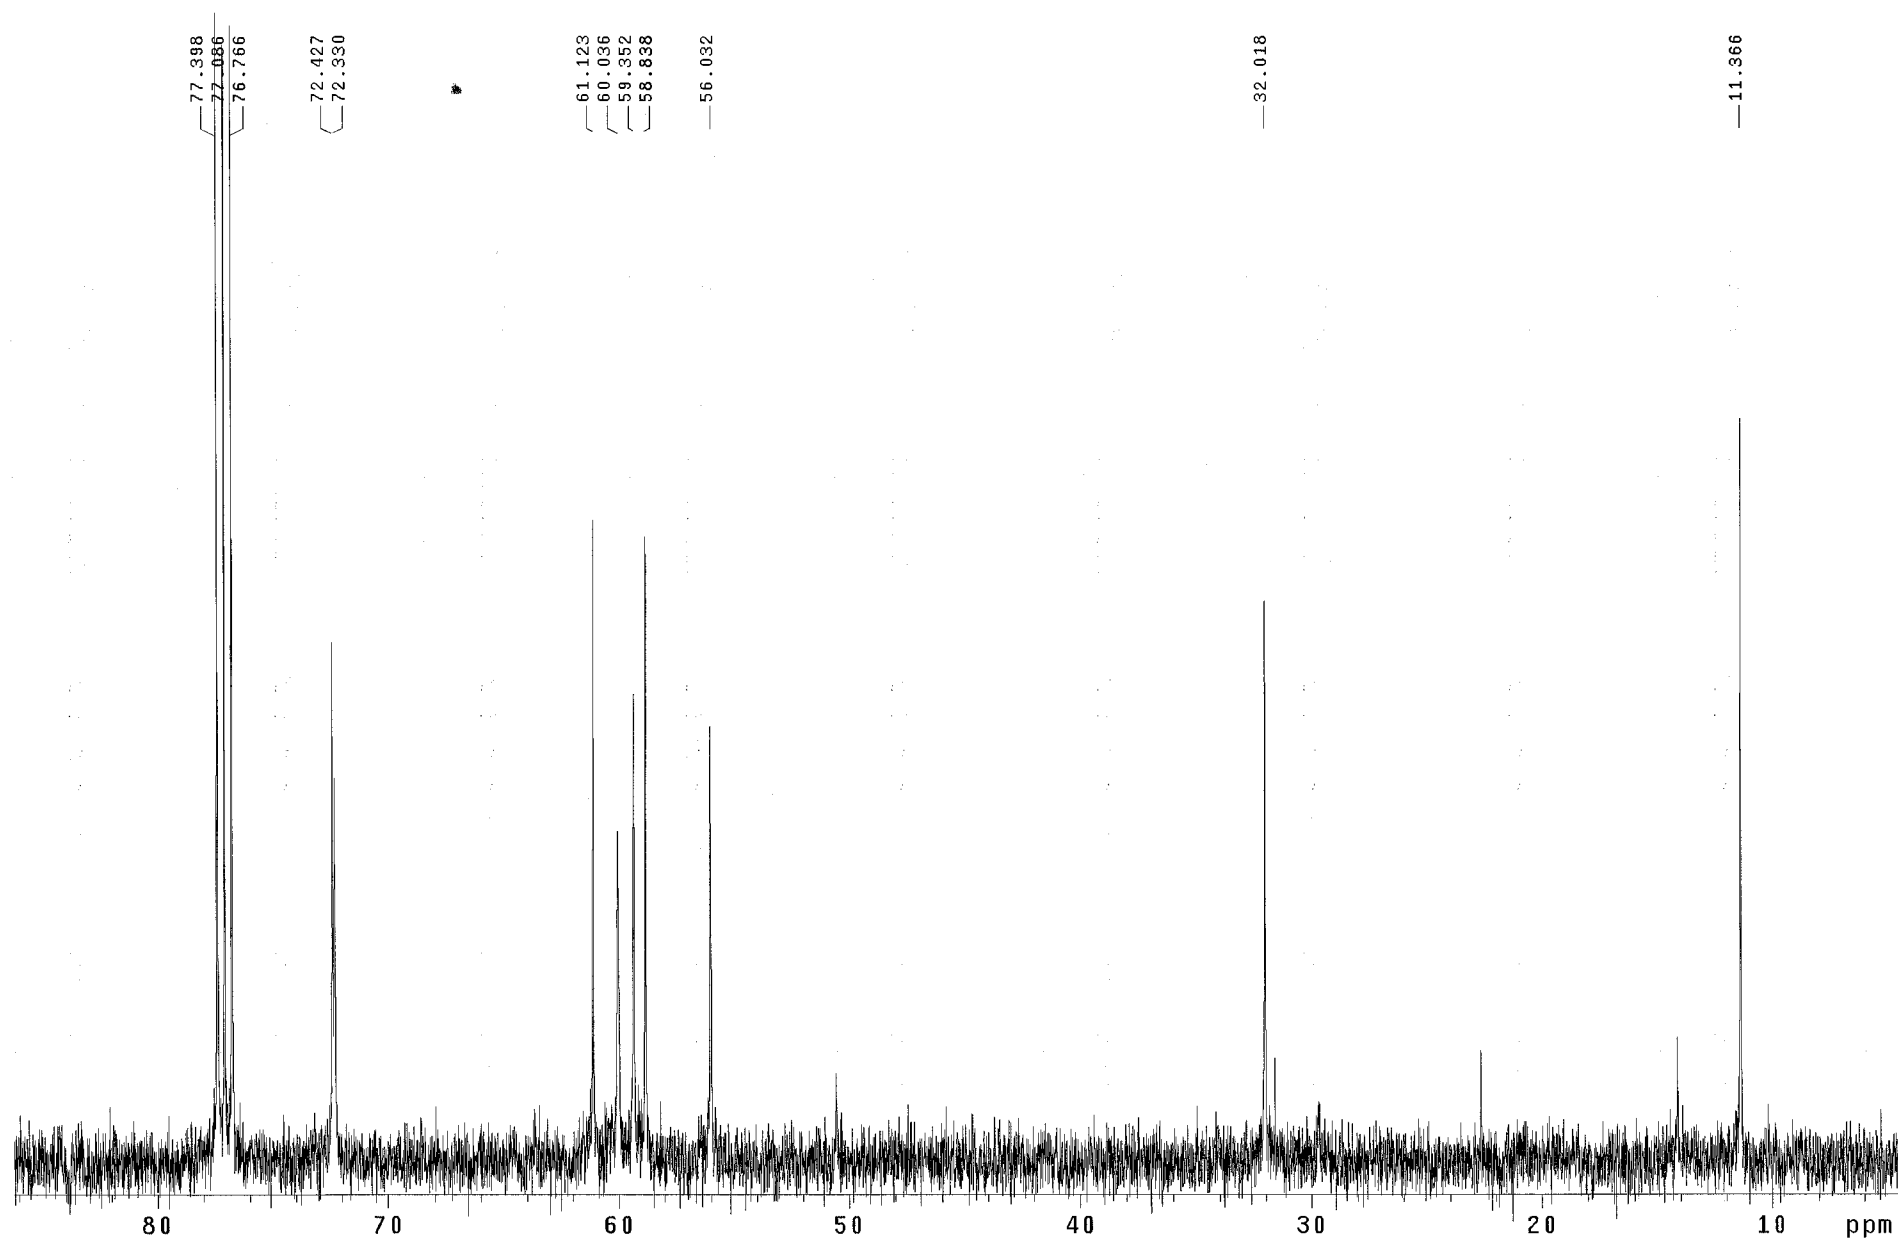



Std proton

File: xp

Pulse Sequence: s2pu1

Solvent: d2o

Ambient temperature

Operator: LWK

VNMRS-400 "Varian-NMR"

Relax. delay 1.000 sec

Pulse 45.0 degrees

Acq. time 2.049 sec

Width 6410.3 Hz

16 repetitions

OBSERVE H1, 399.6981939 MHz

DATA PROCESSING

Resol. enhancement -0.0 Hz

FT size 65536

Total time 0 min, 55 sec

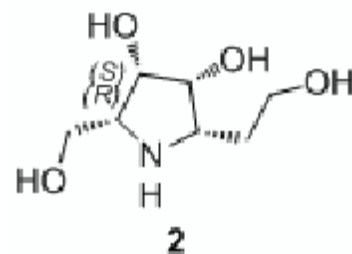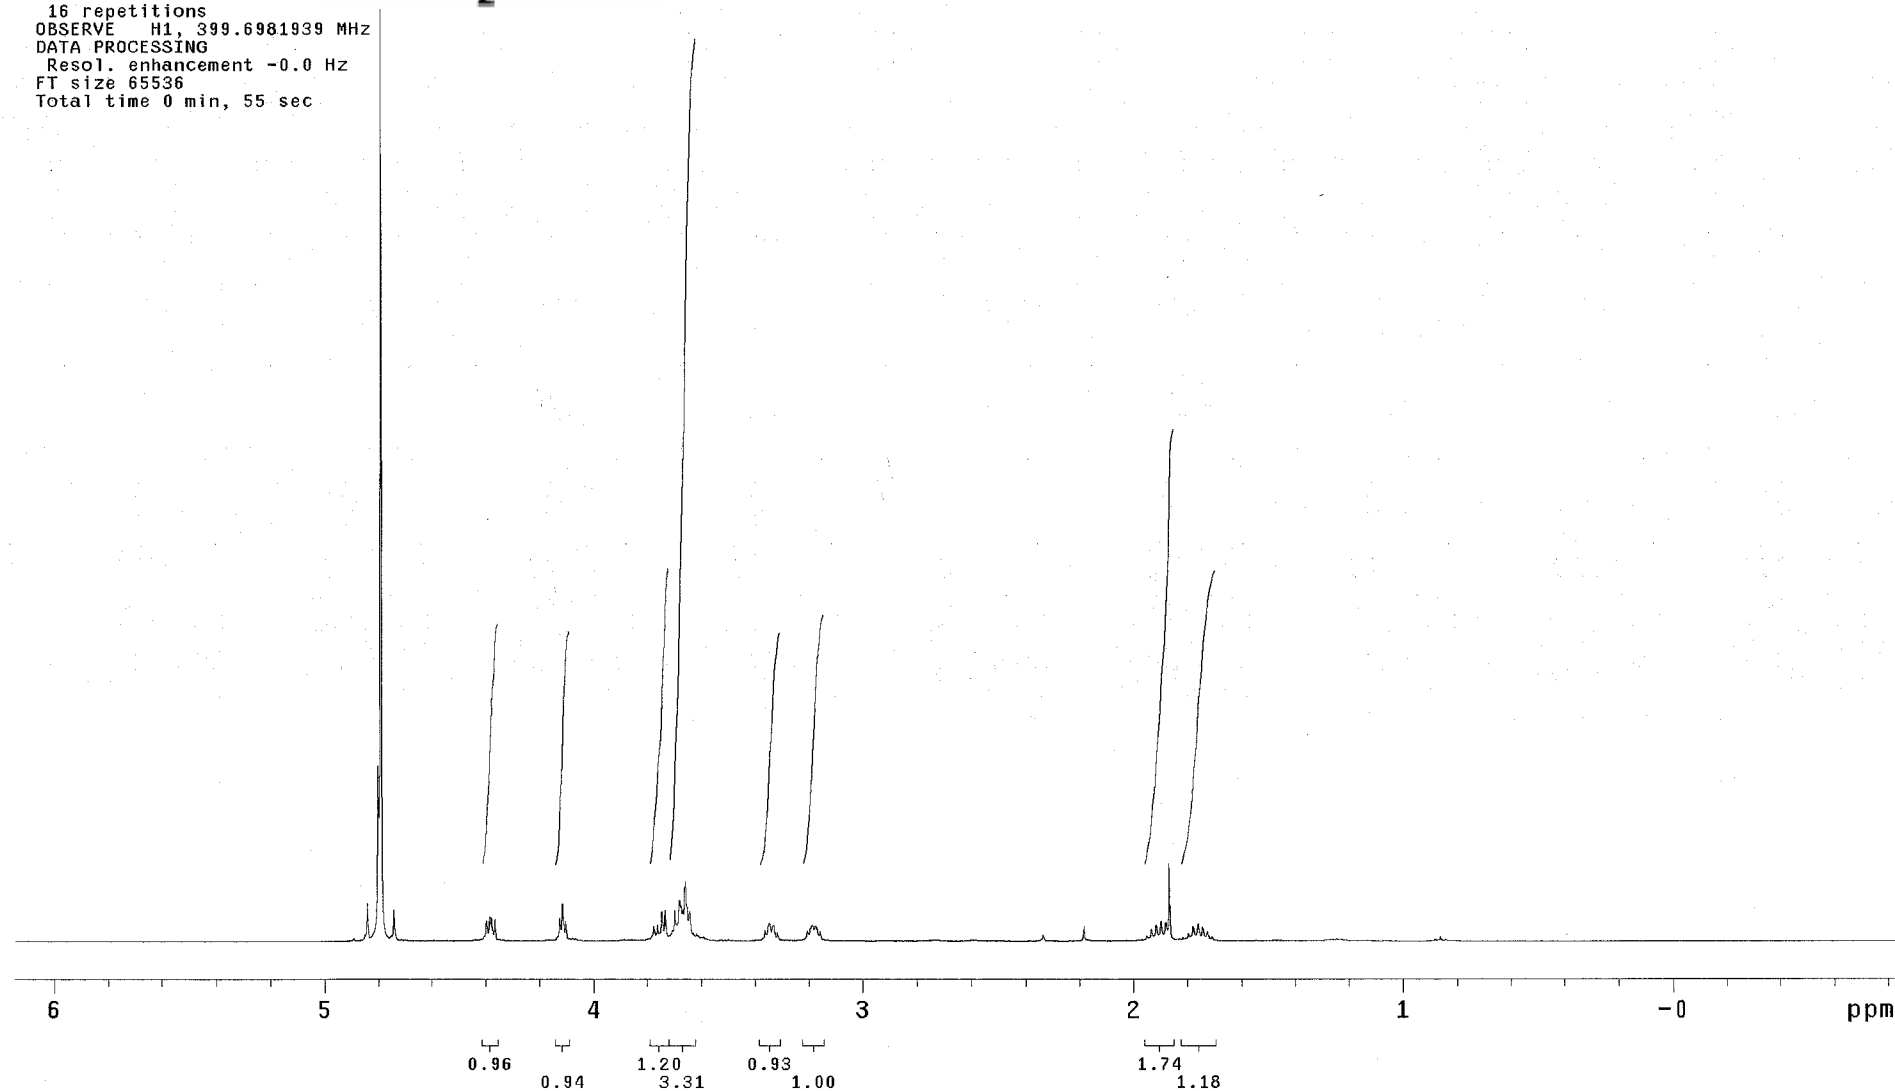

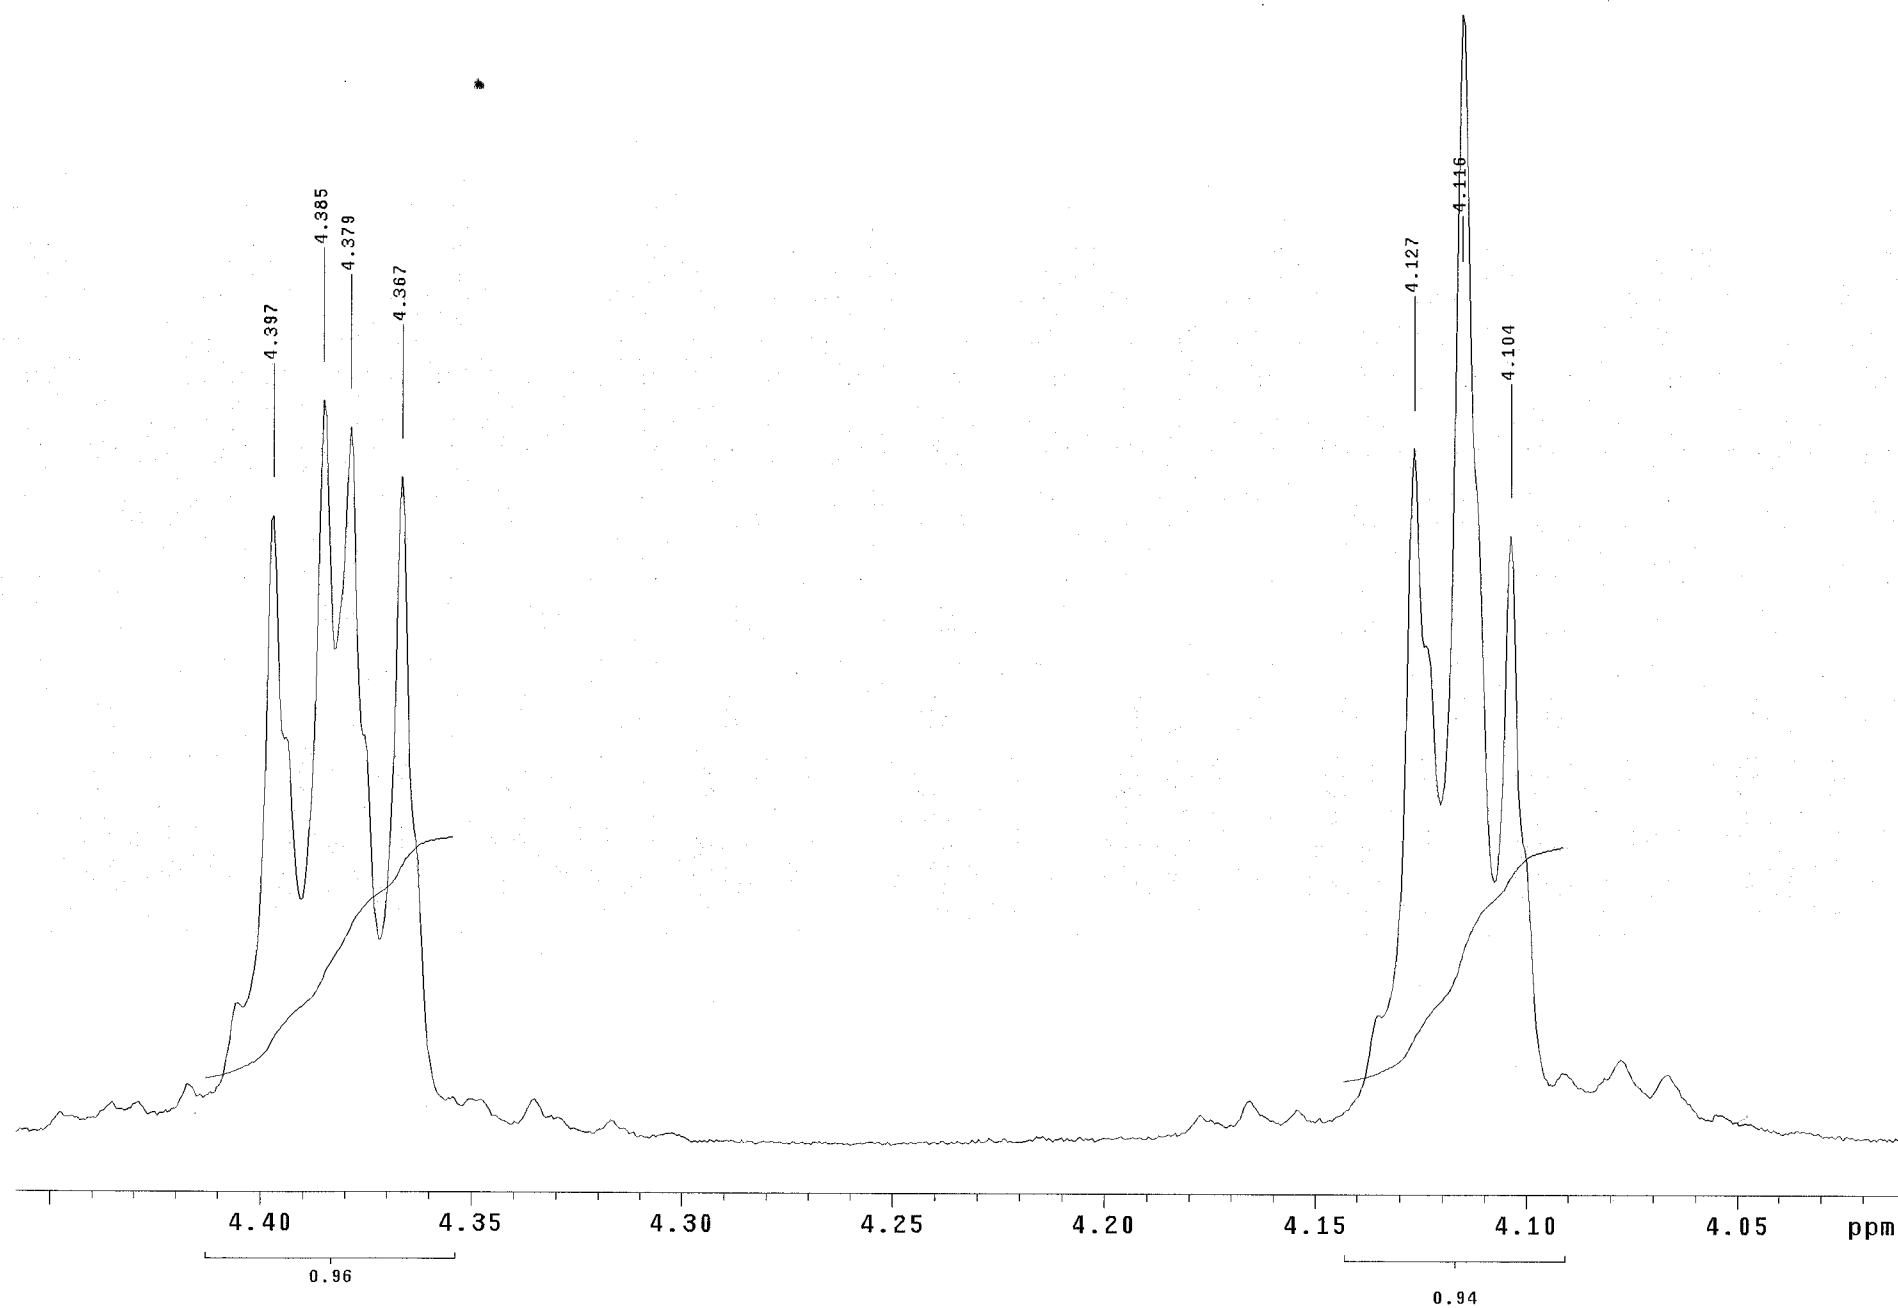

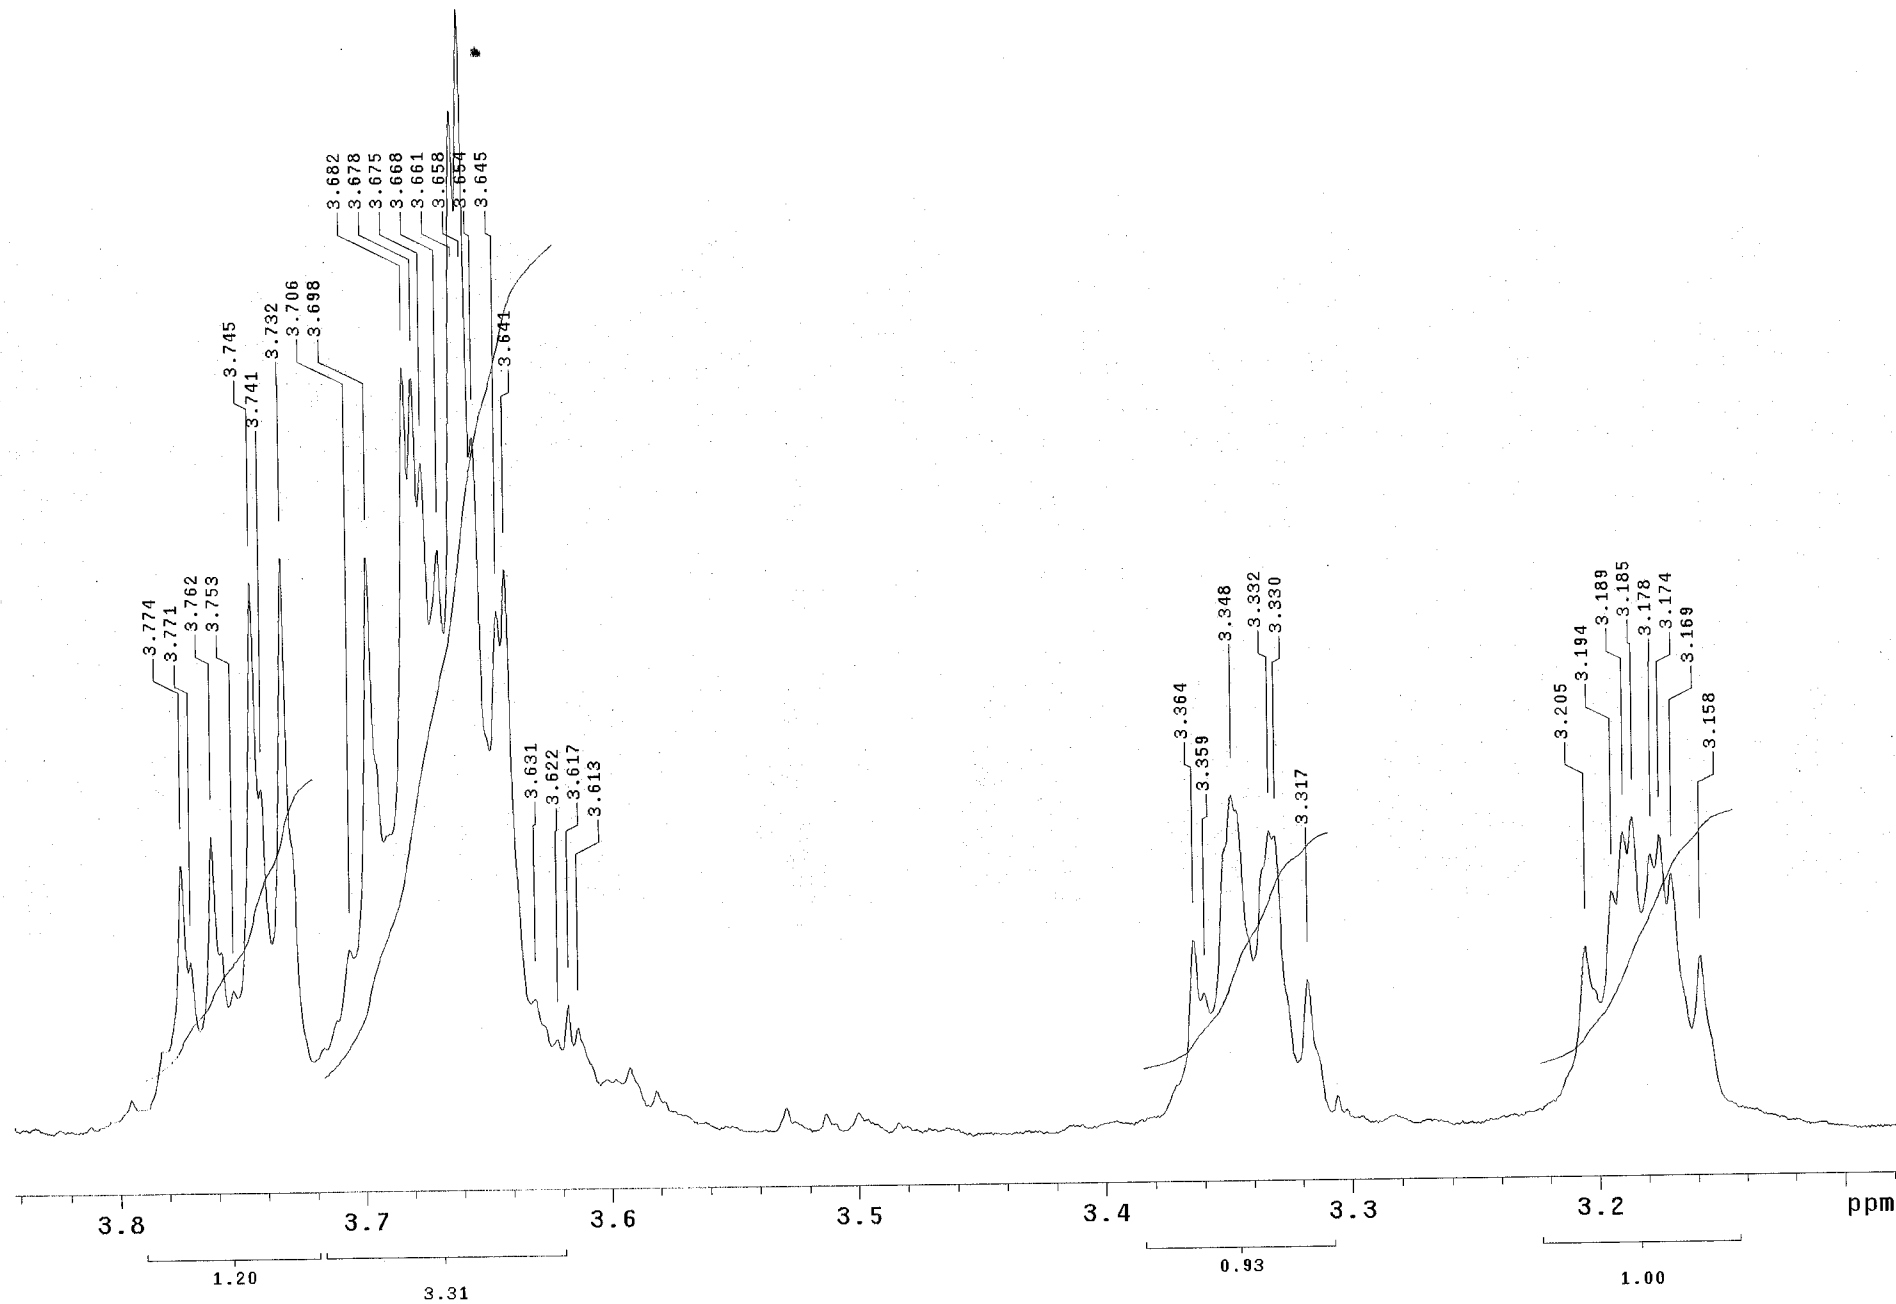

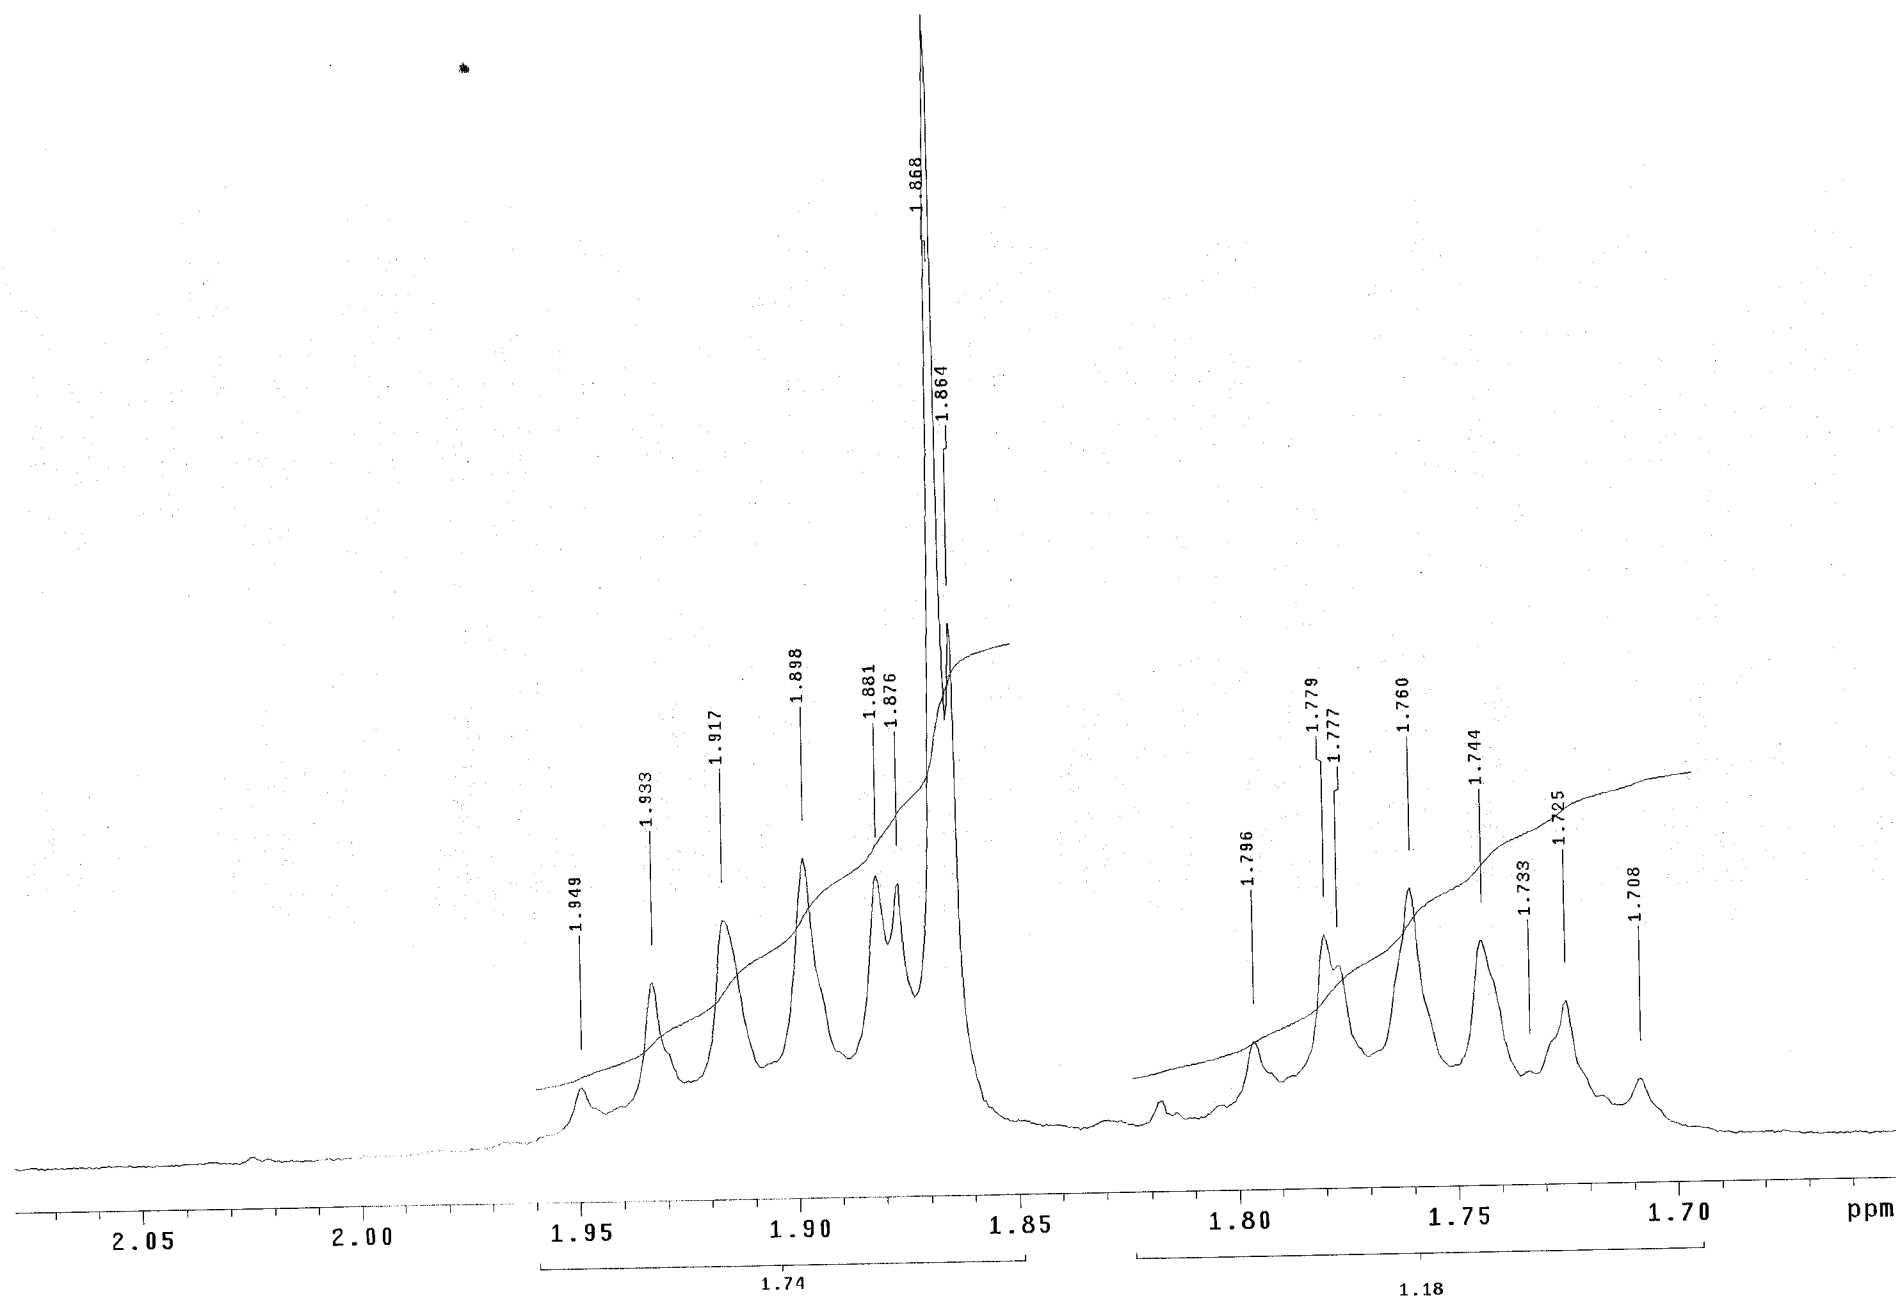

Std carbon

File: xp

Pulse Sequence: s2pul

Solvent: d2o

Temp. 25.0 C / 298.1 K

Operator: LWK

VMRS-400 "Varian-NMR"

Relax. delay 1.000 sec

Pulse 45.0 degrees

Acq. time 1.300 sec

Width 24509.8 Hz

384 repetitions

OBSERVE C13, 100.5042054 MHz

DECOUPLE H1, 399.7002504 MHz

Power 37 dB

continuously on

WALTZ-16 modulated

DATA PROCESSING

Line broadening 0.5 Hz

FT size 65536

Total time 1 hr, 16 min, 41 sec

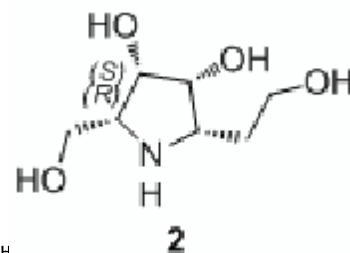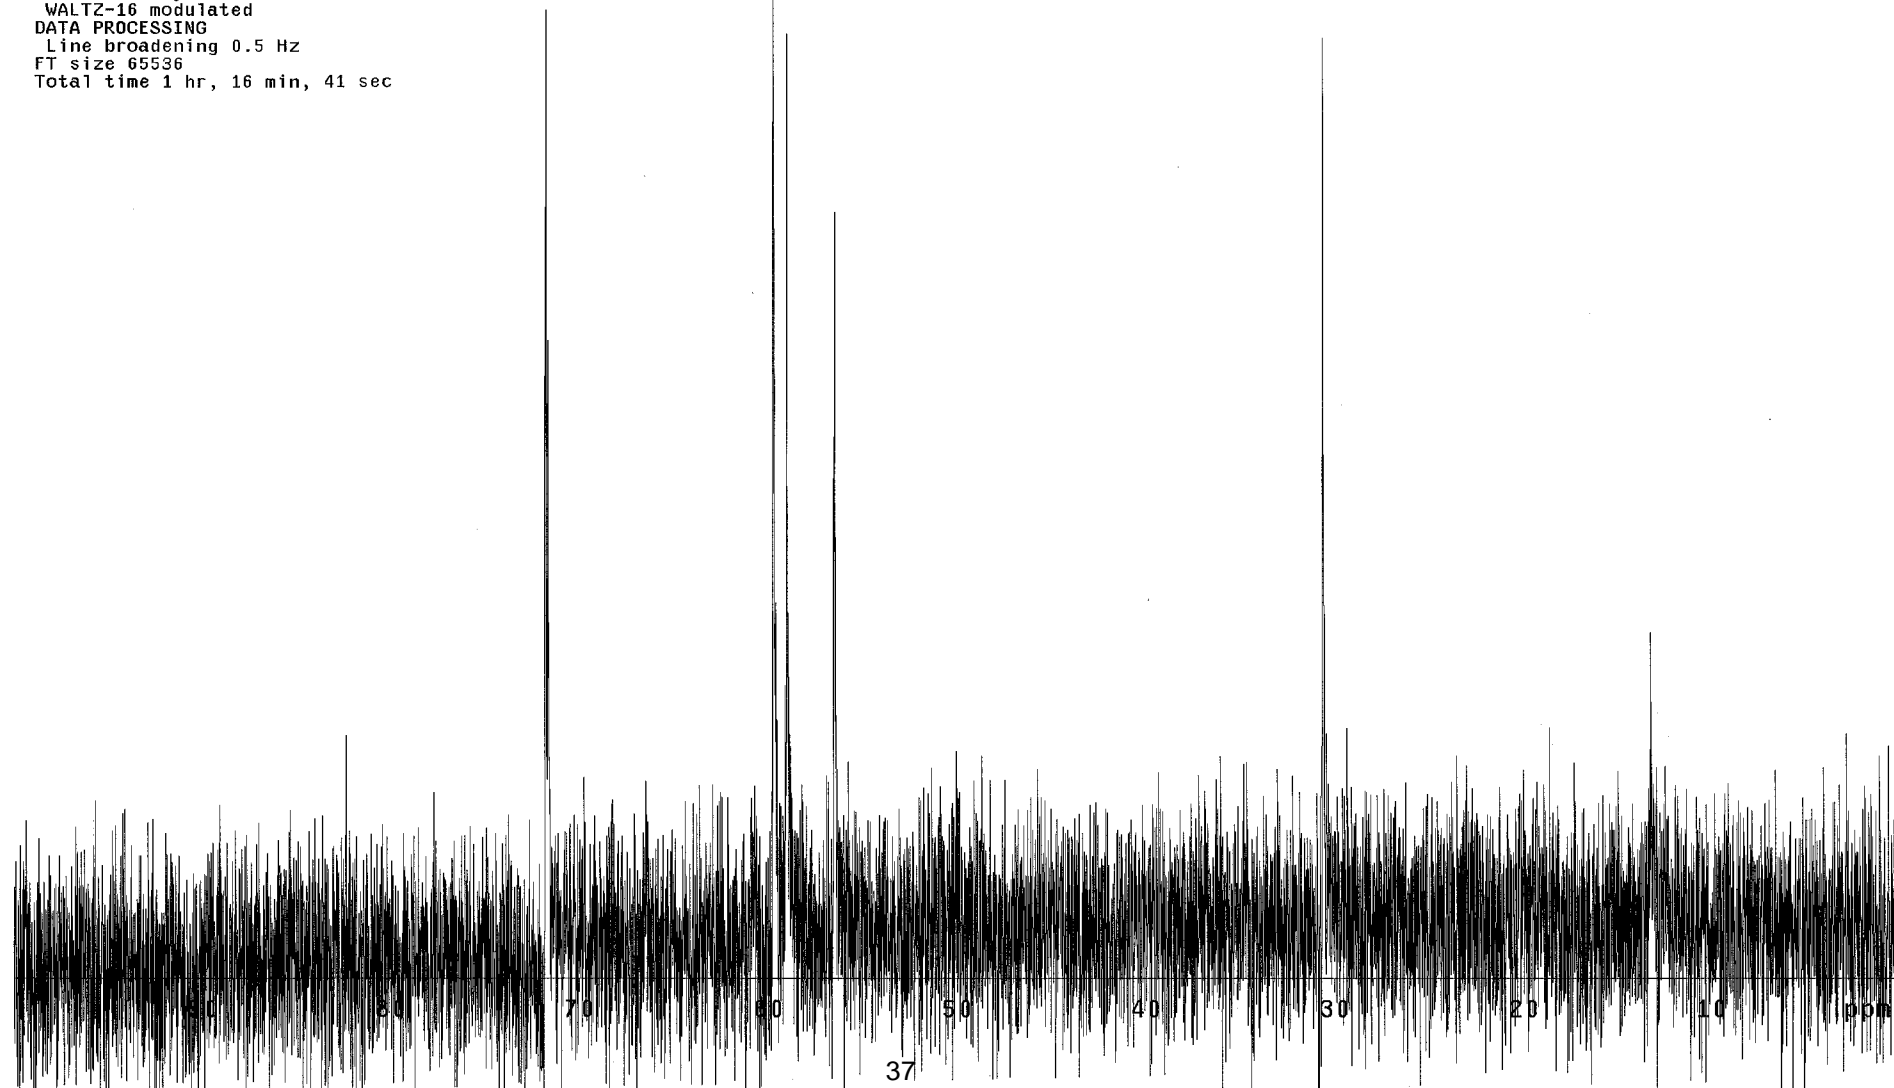

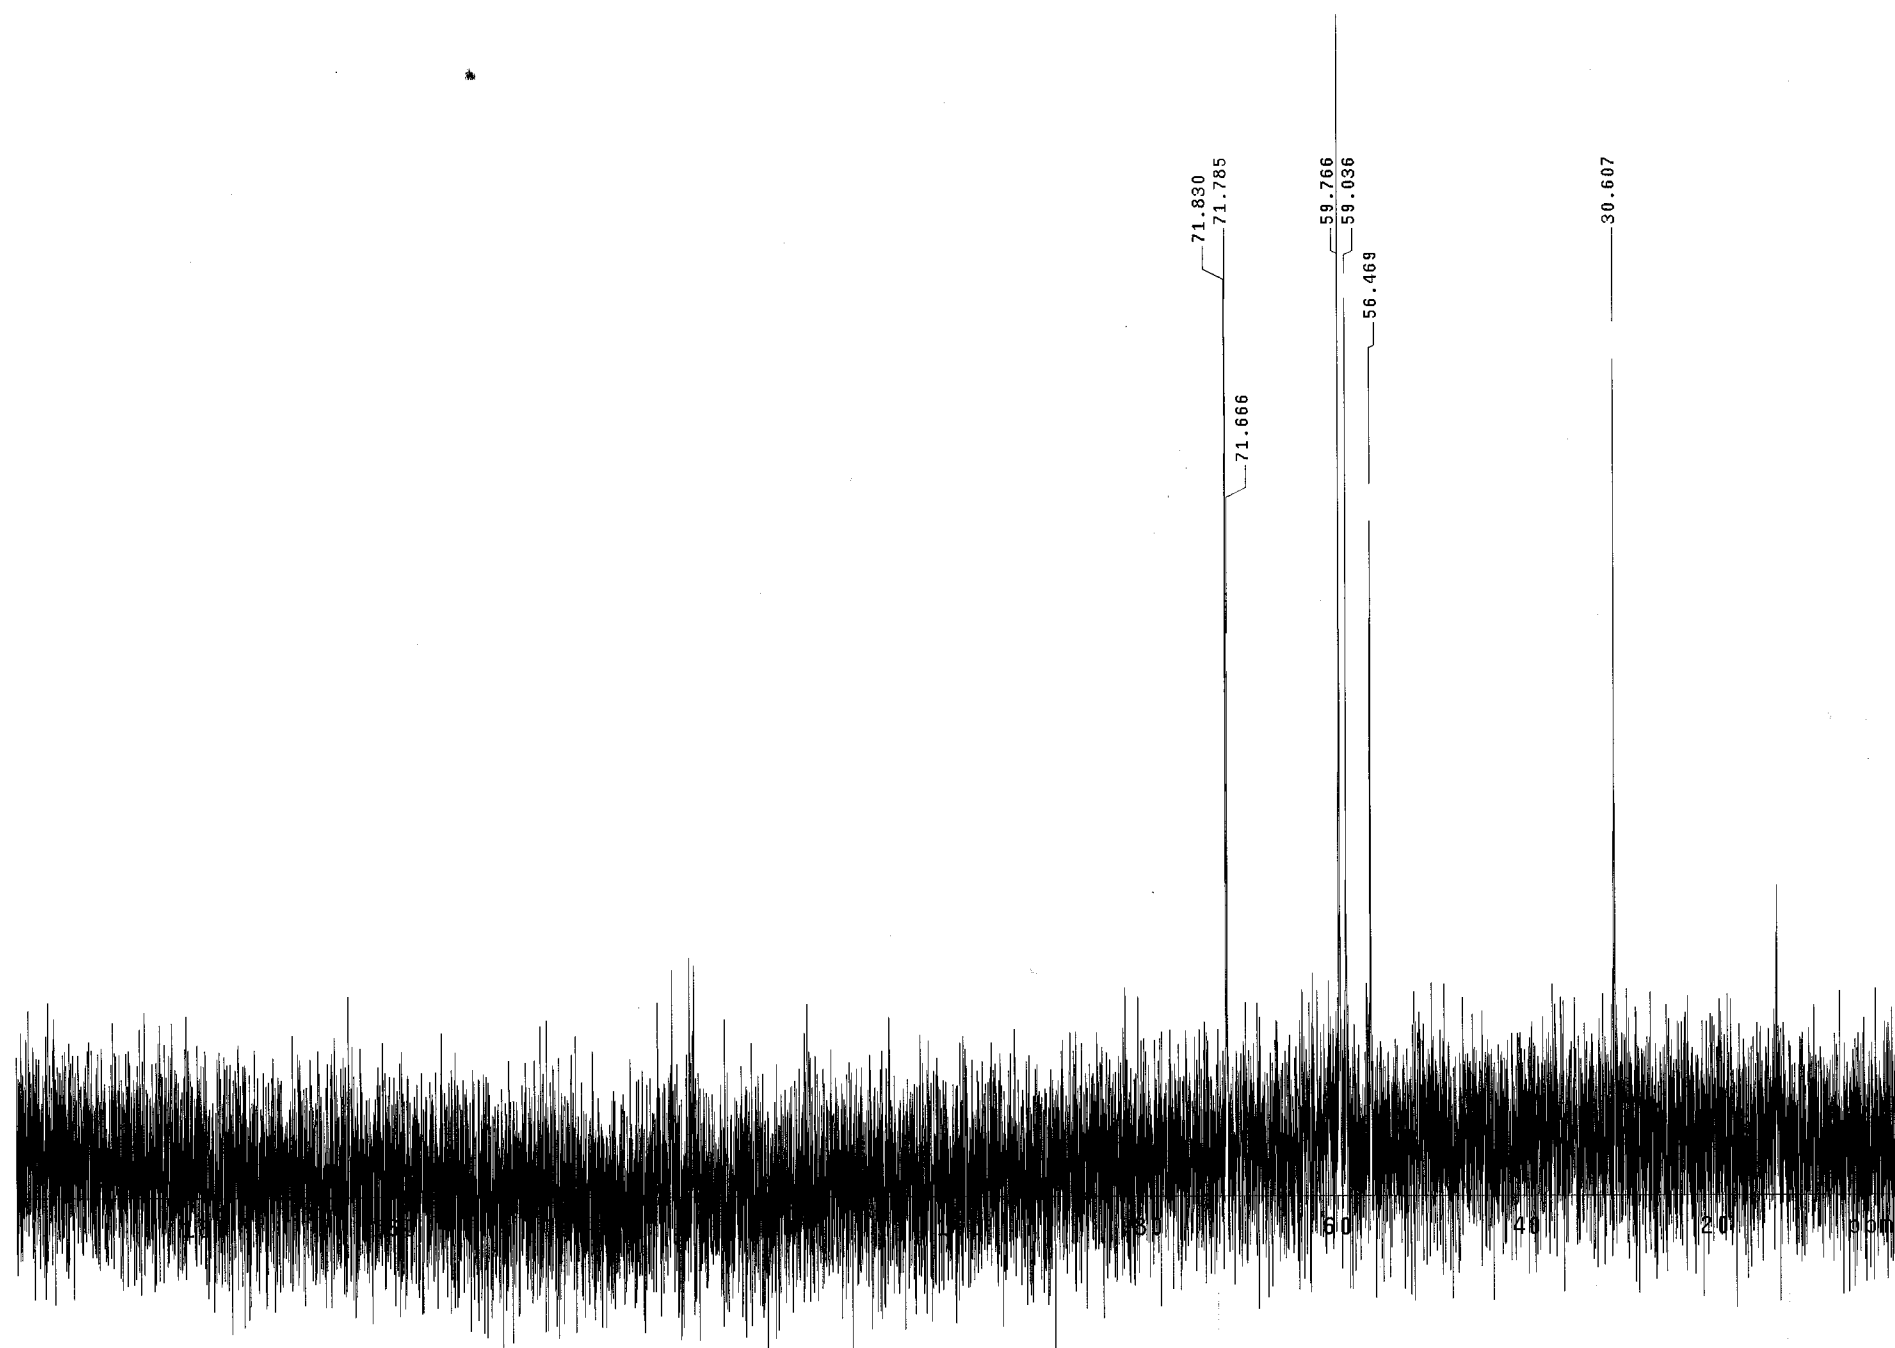

Std proton

File: xp

Pulse Sequence: s2pu1

Solvent: cdcl3

Ambient temperature

Operator: LWK

VNMRS-400 "Varian-NMR"

Relax. delay 1.000 sec

Pulse 45.0 degrees

Acq. time 2.049 sec

Width 6410.3 Hz

8 repetitions

OBSERVE H1, 399.7193691 MHz

DATA PROCESSING

Resol. enhancement -0.0 Hz

FT size 65536

Total time 0 min, 30 sec

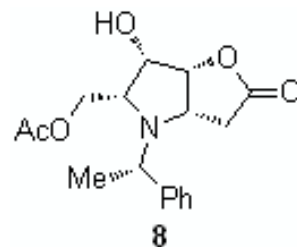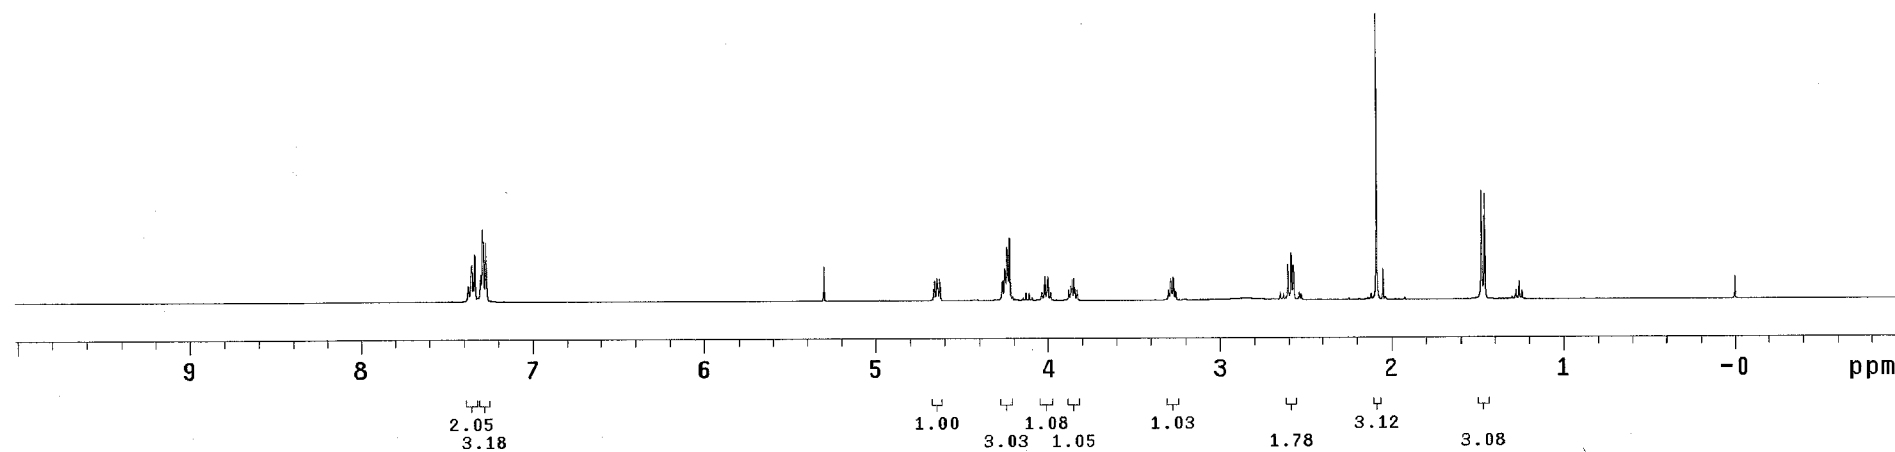

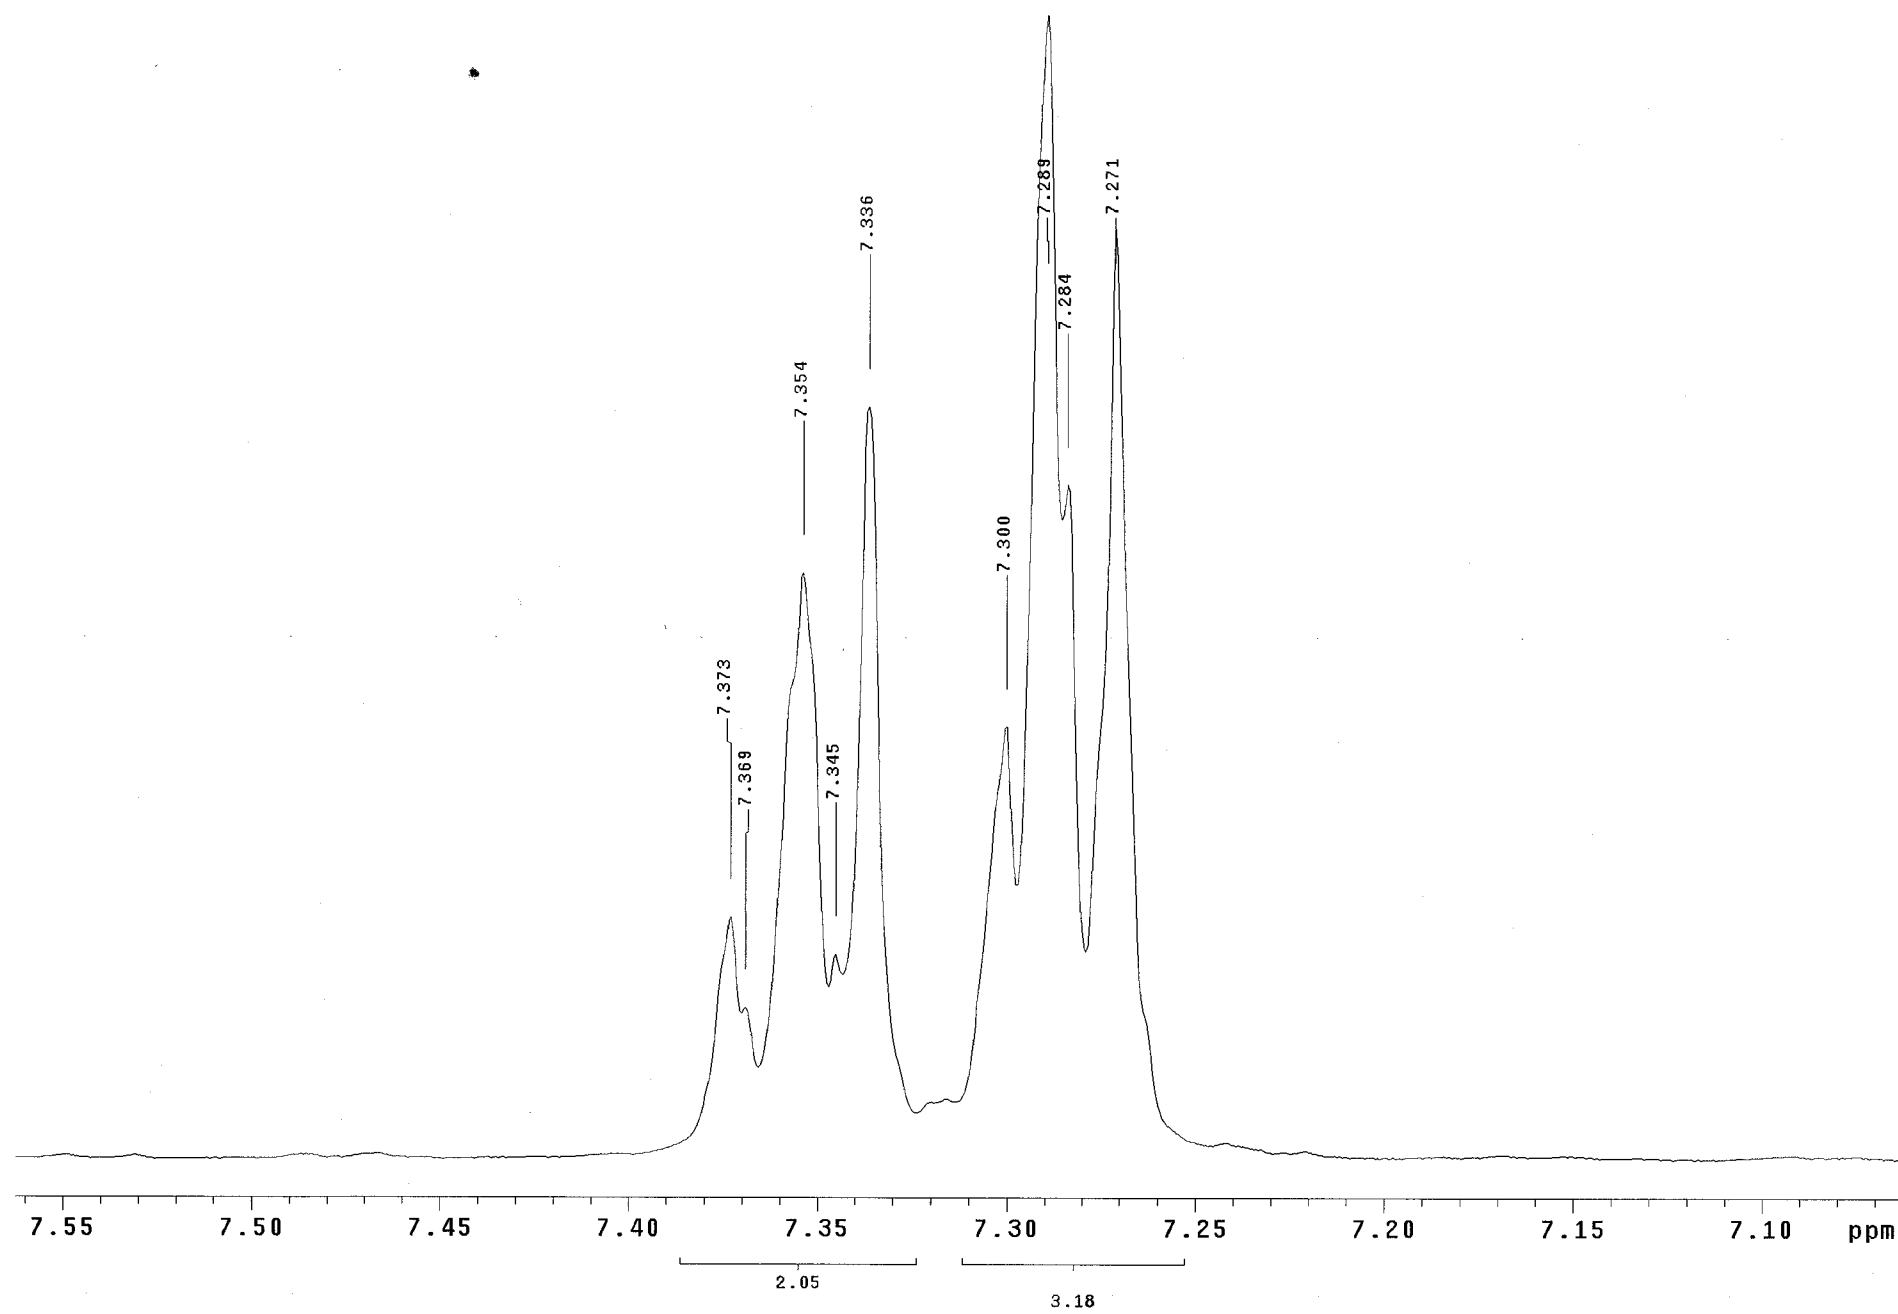



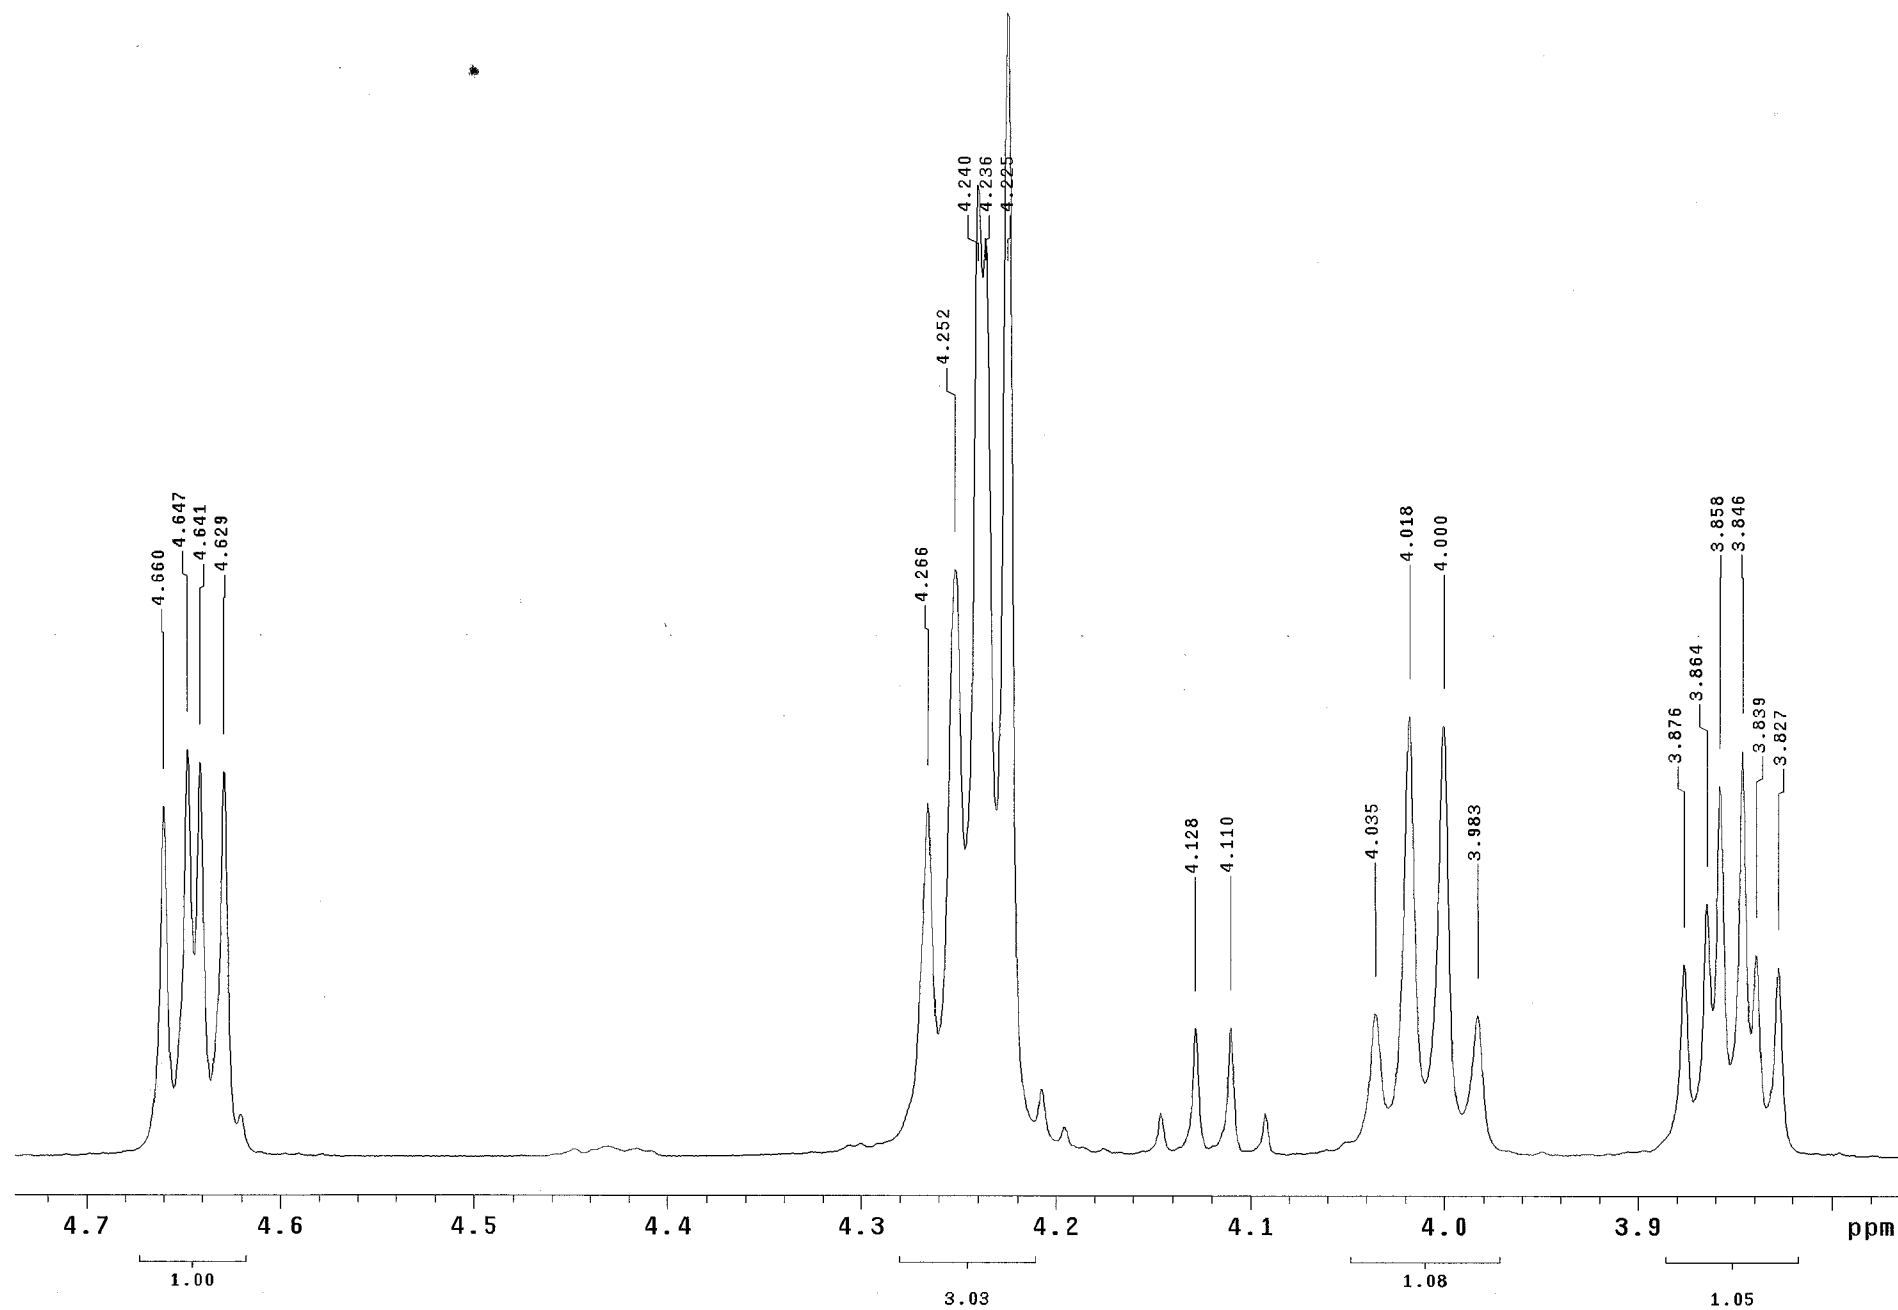

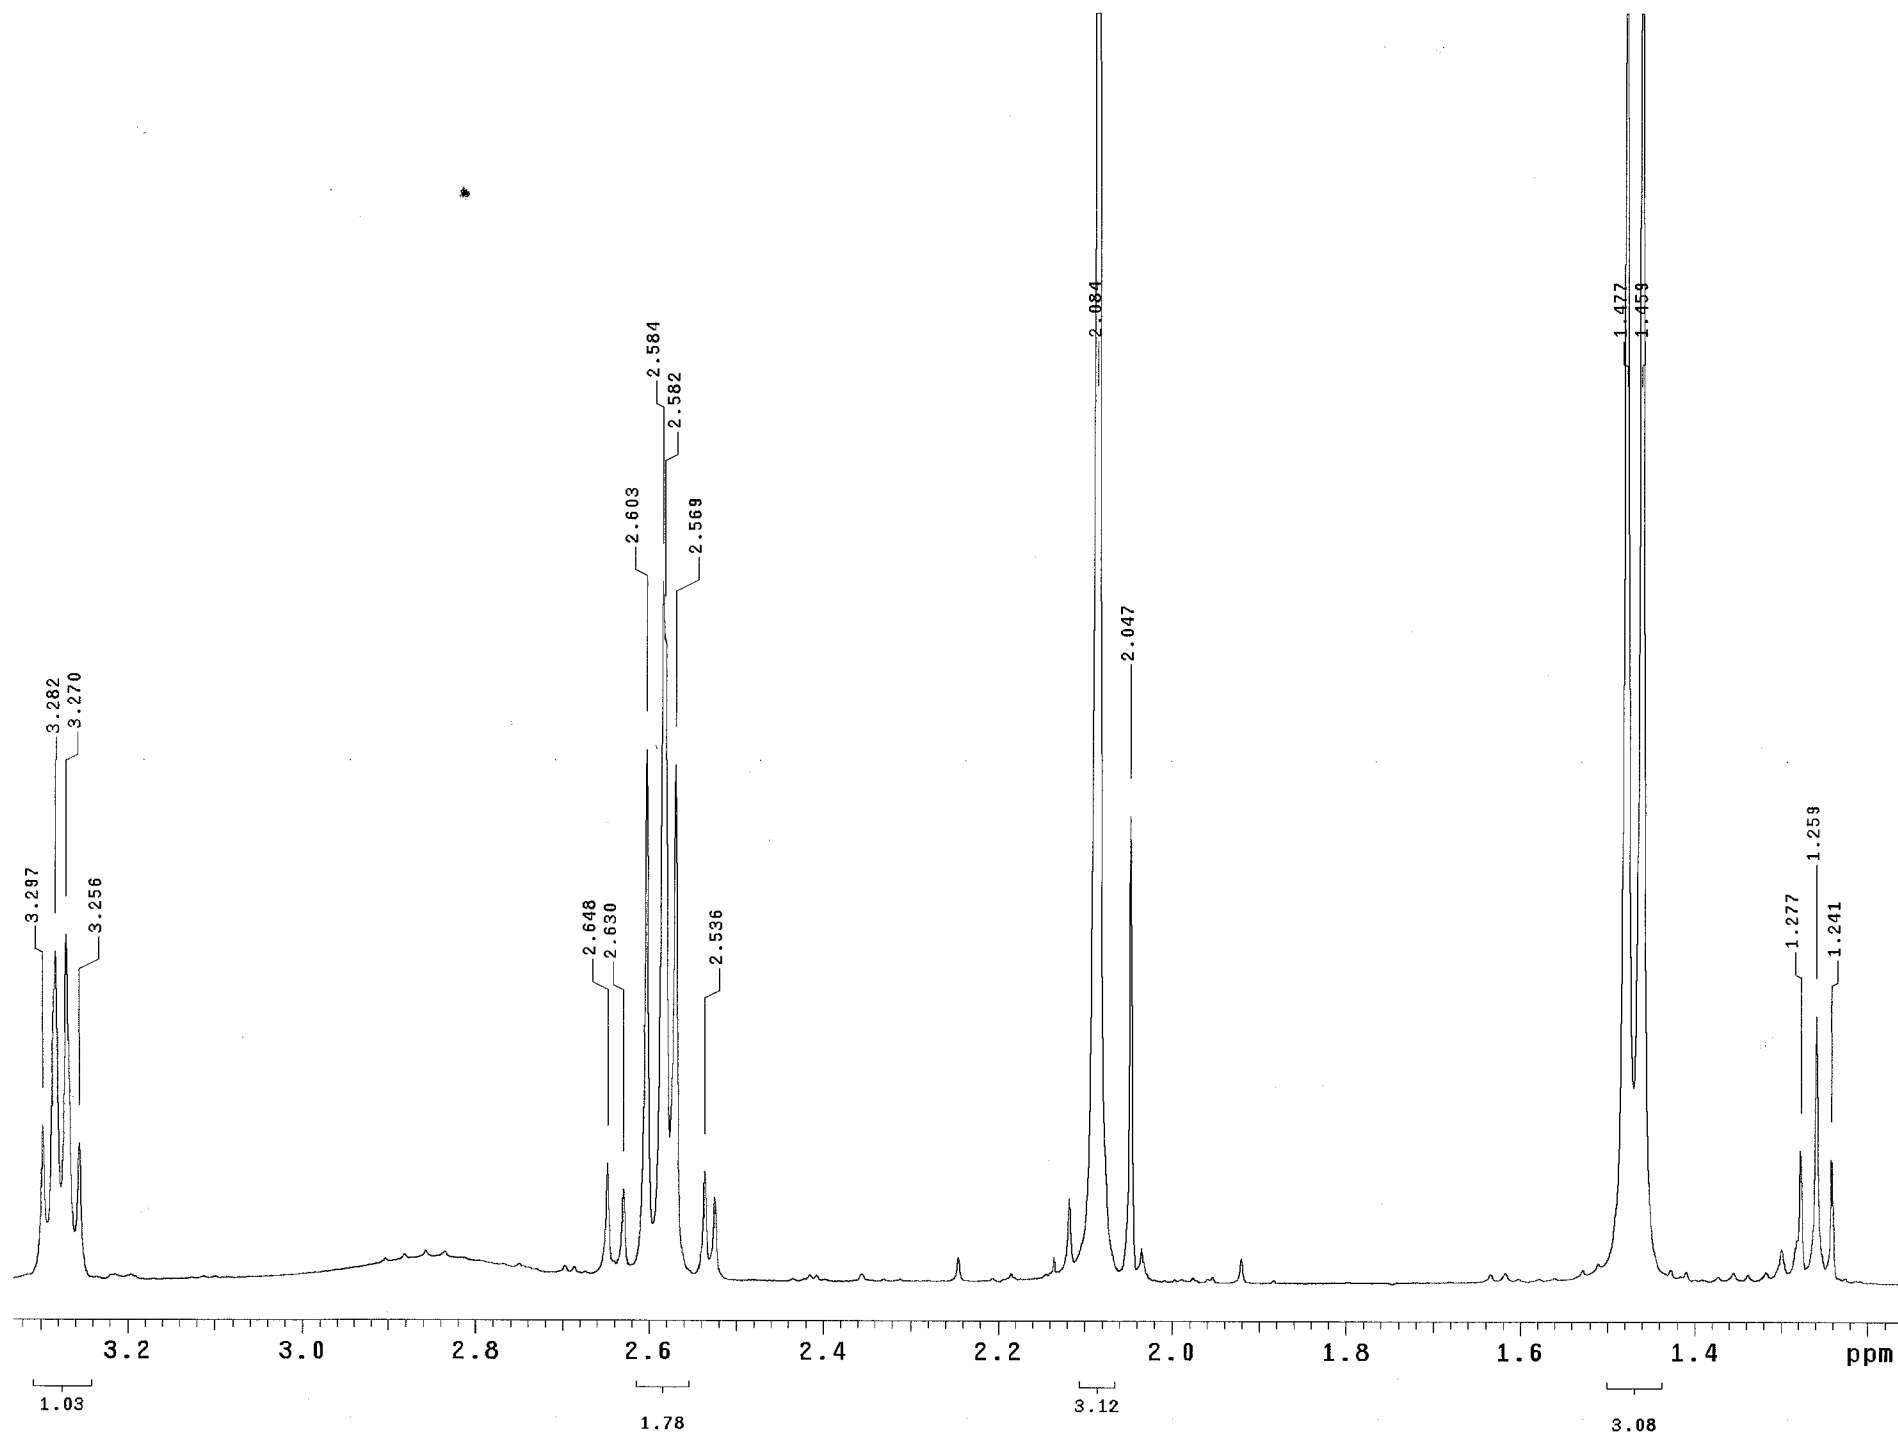

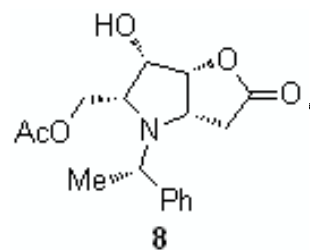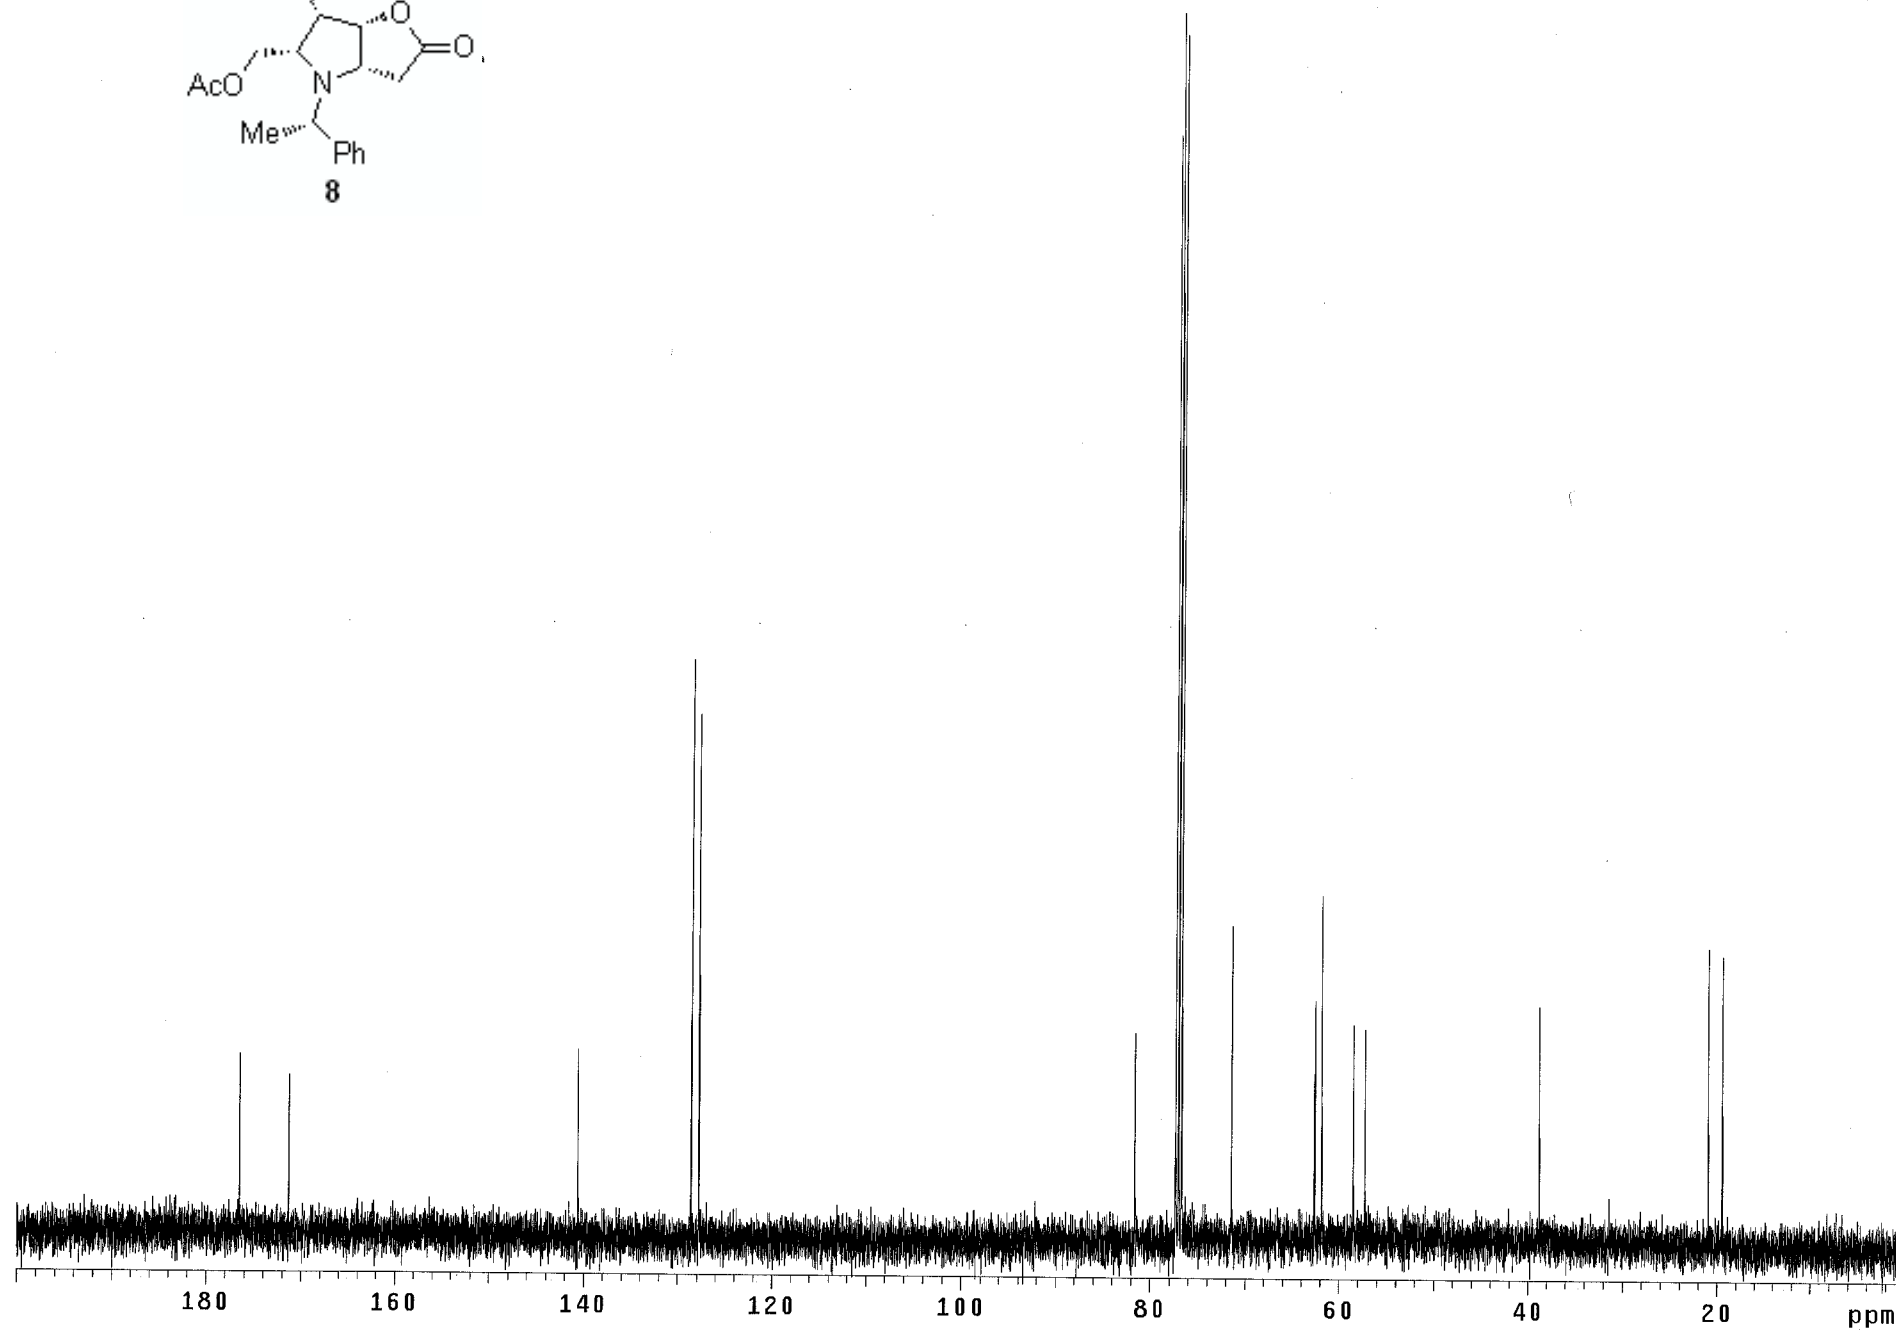

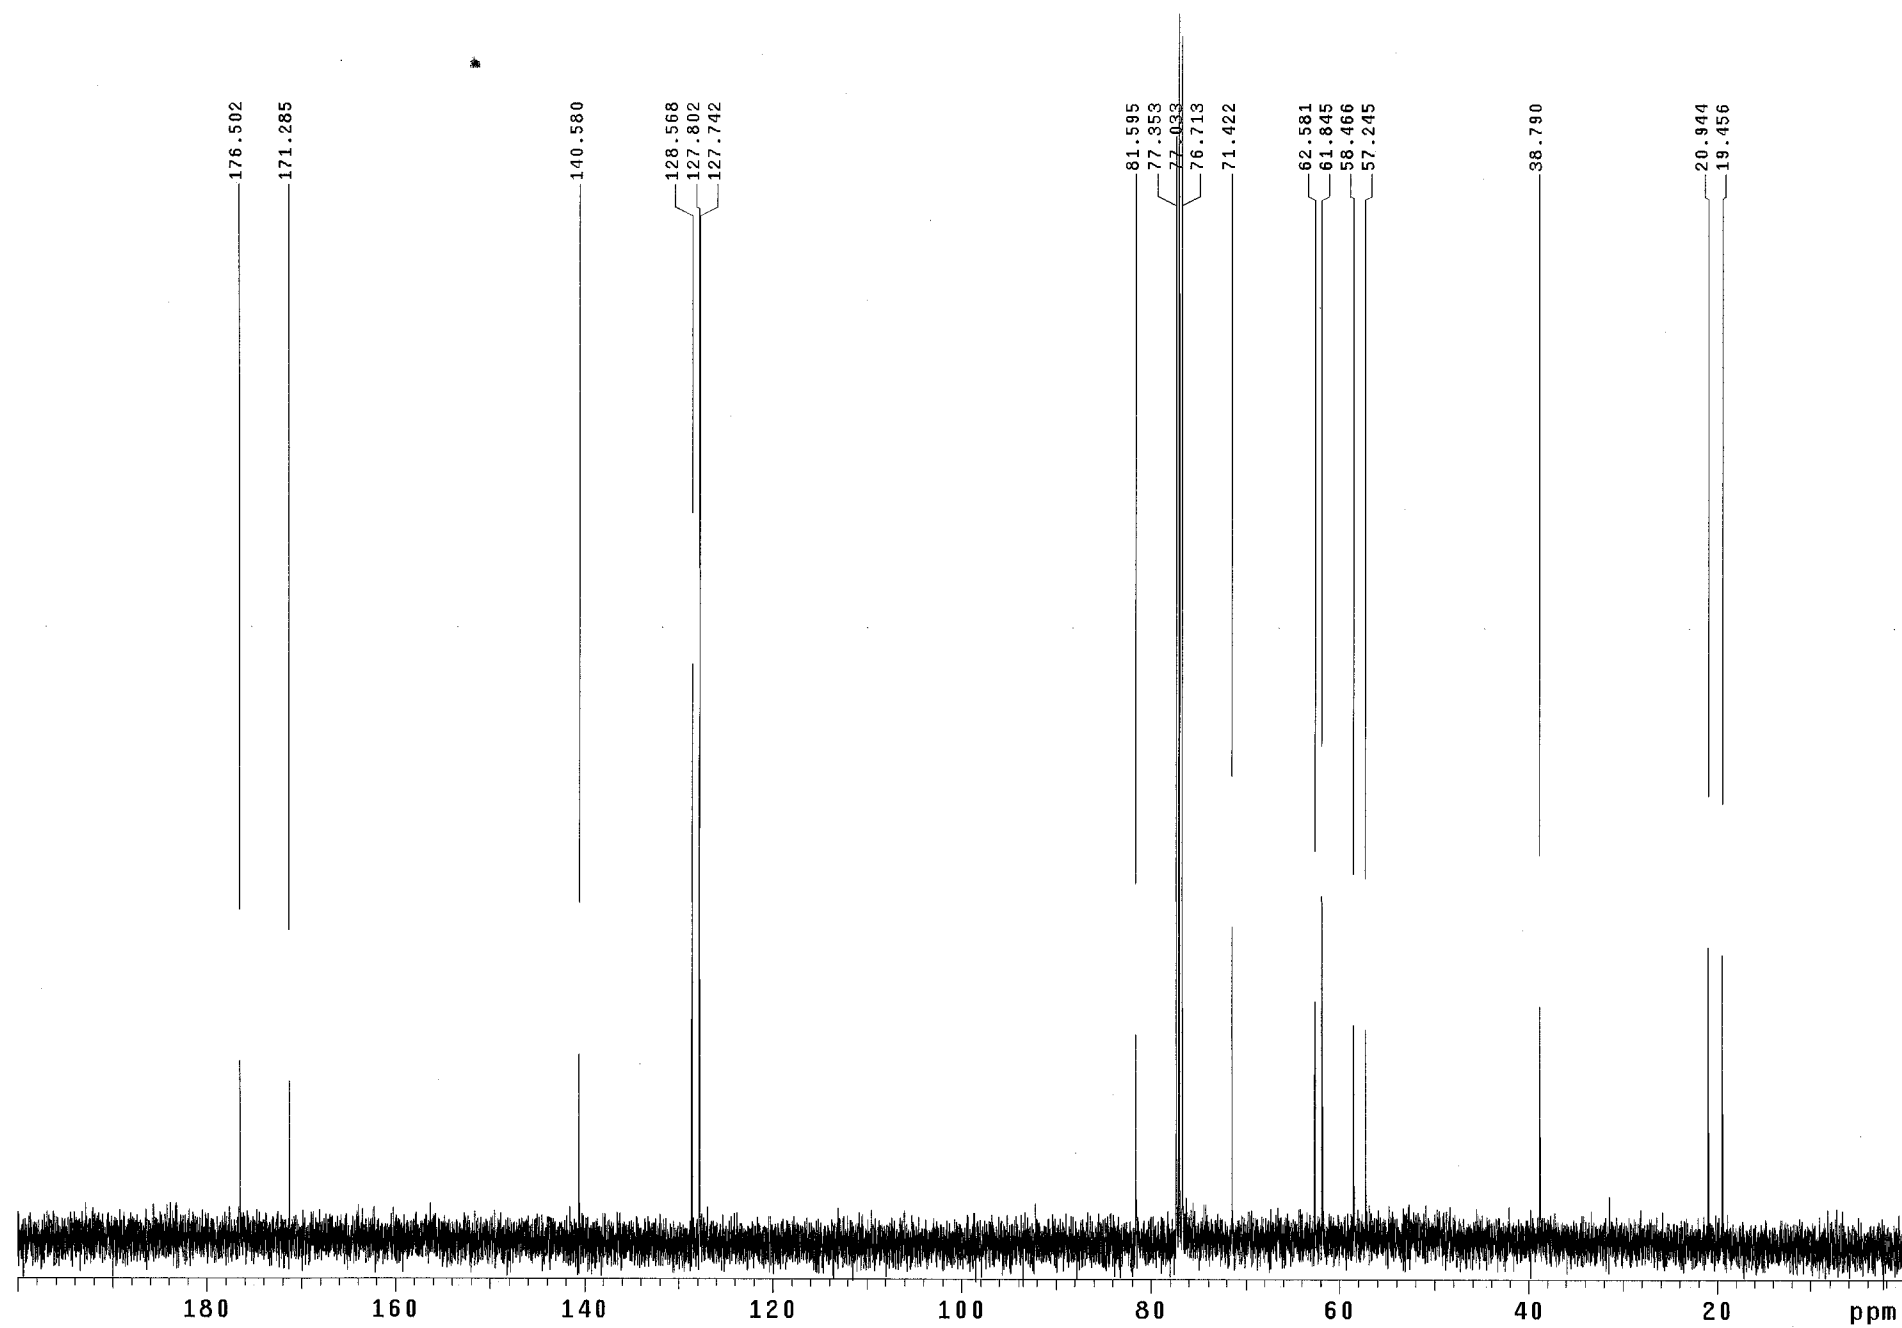

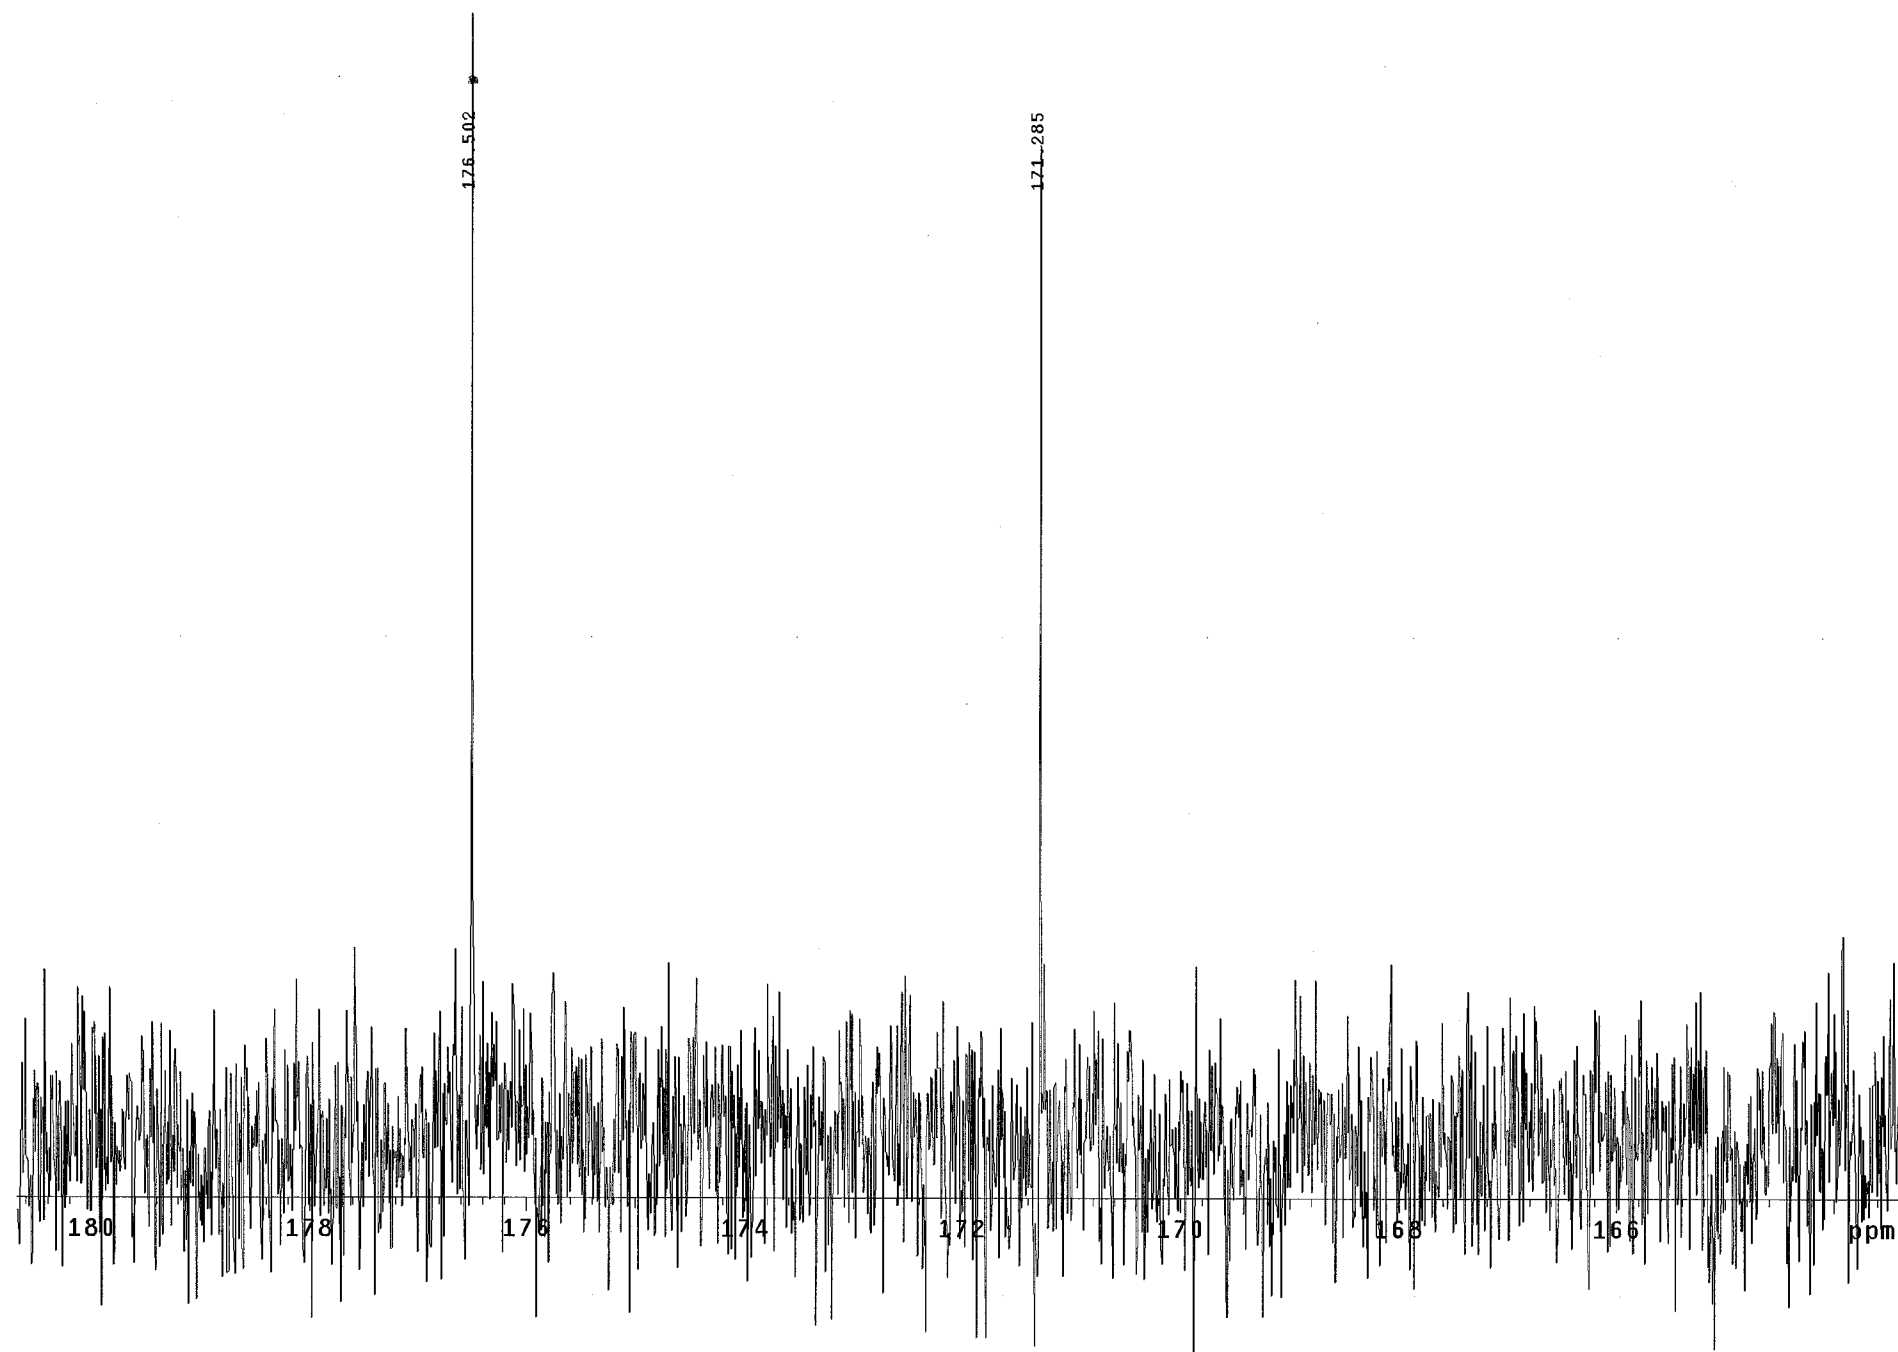

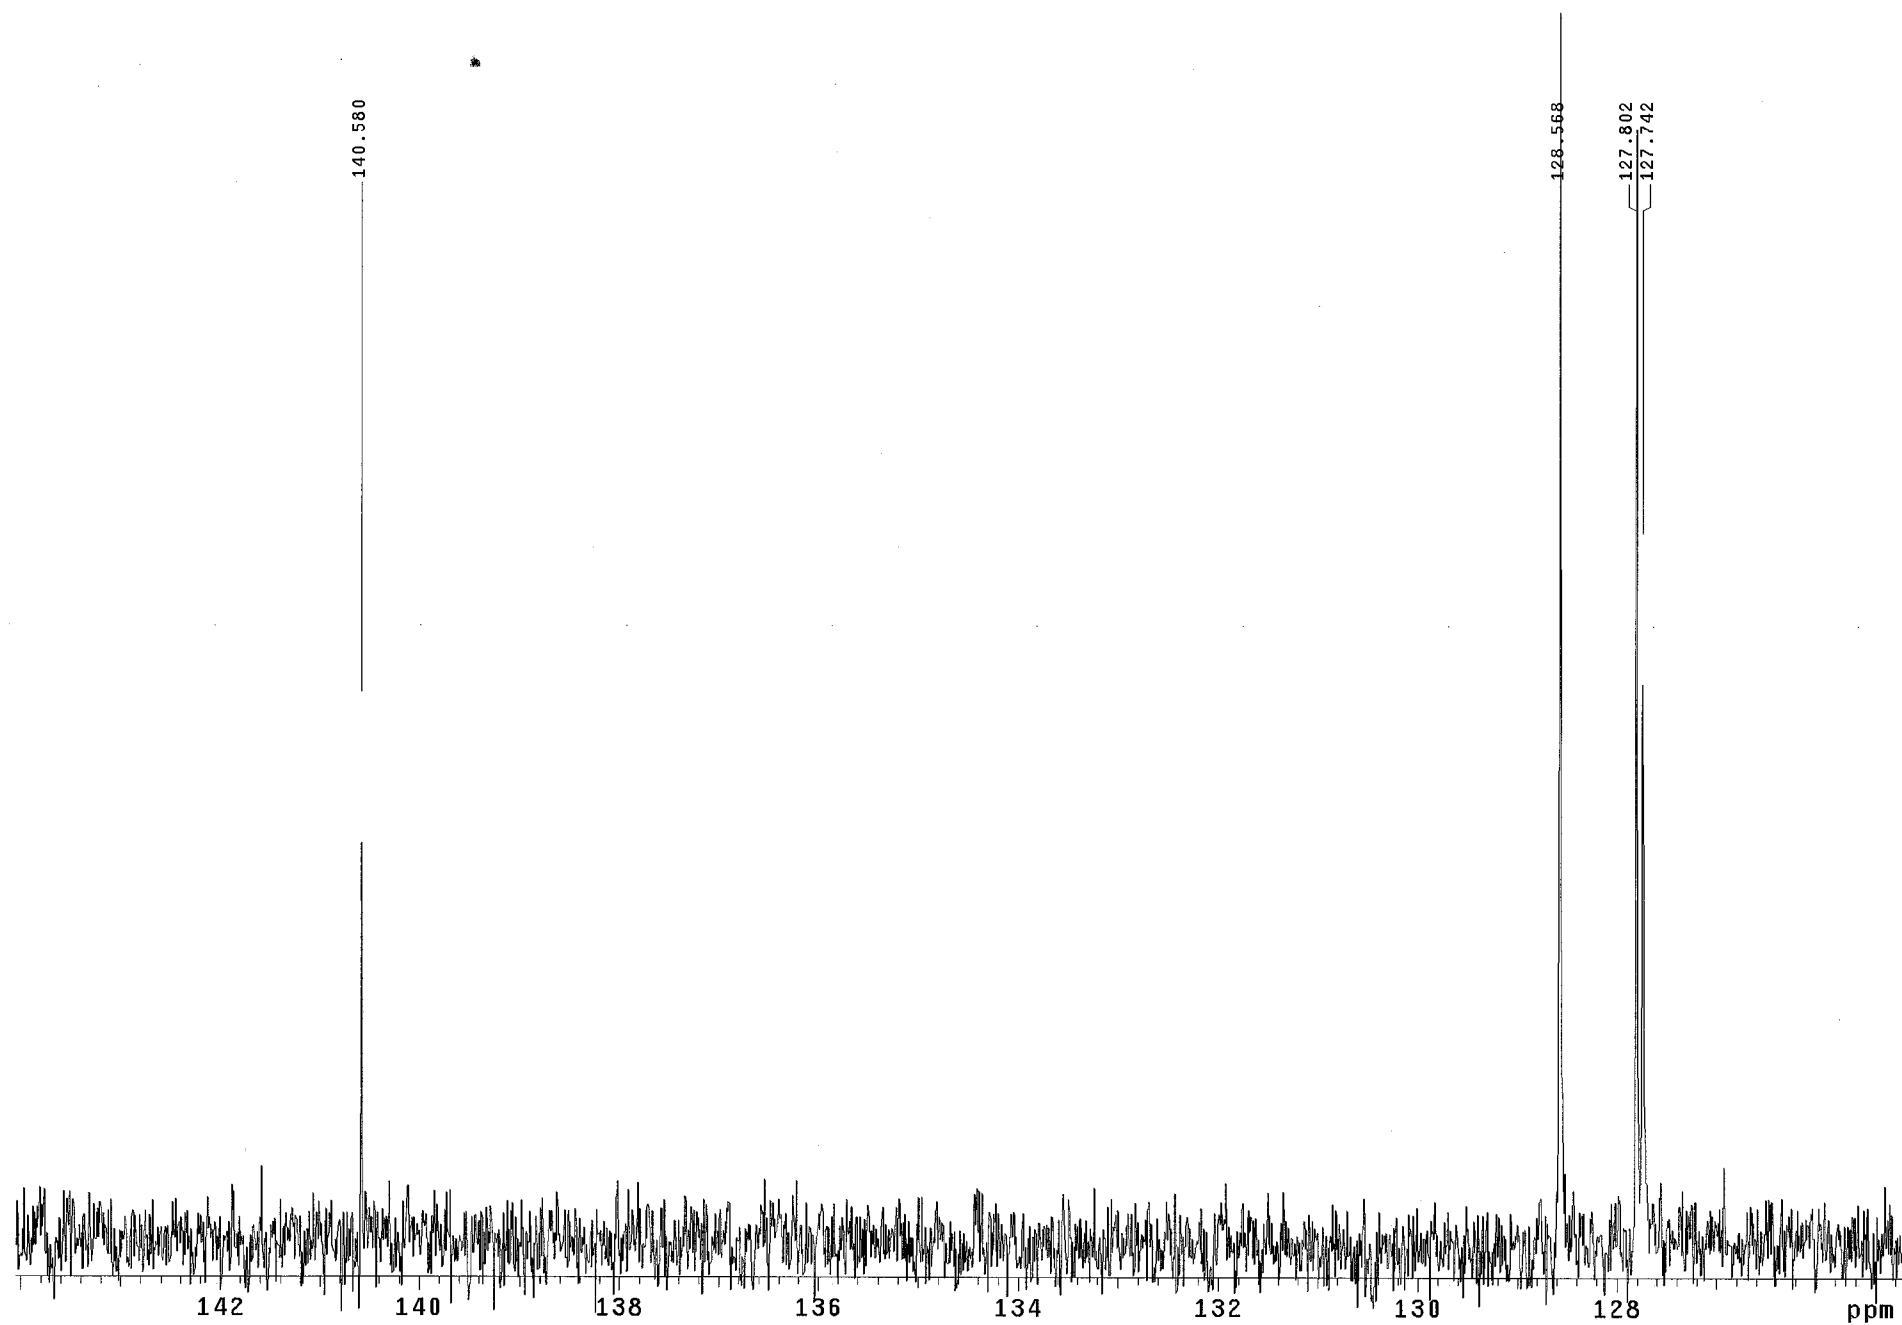

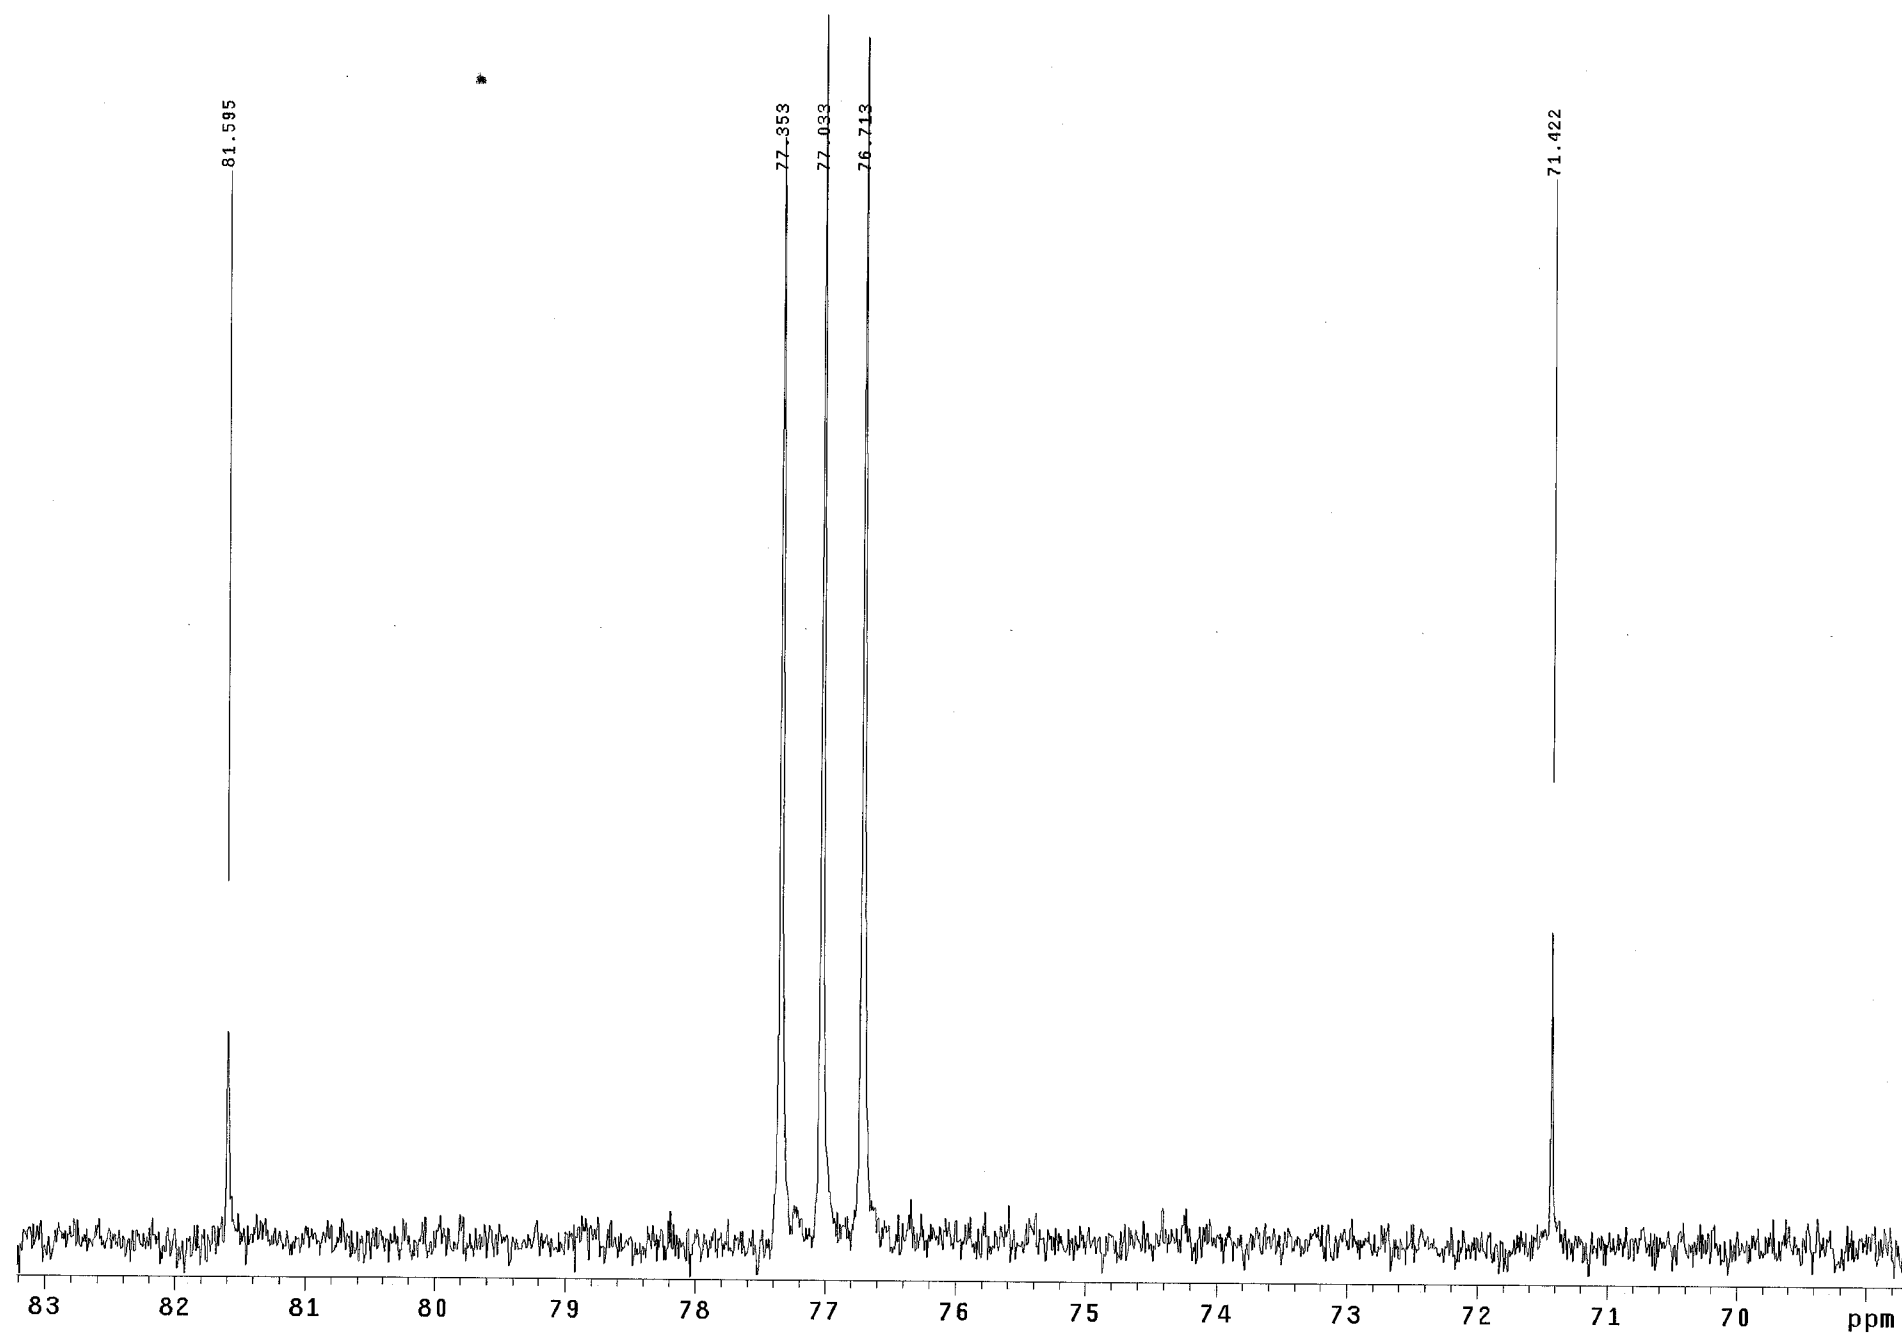

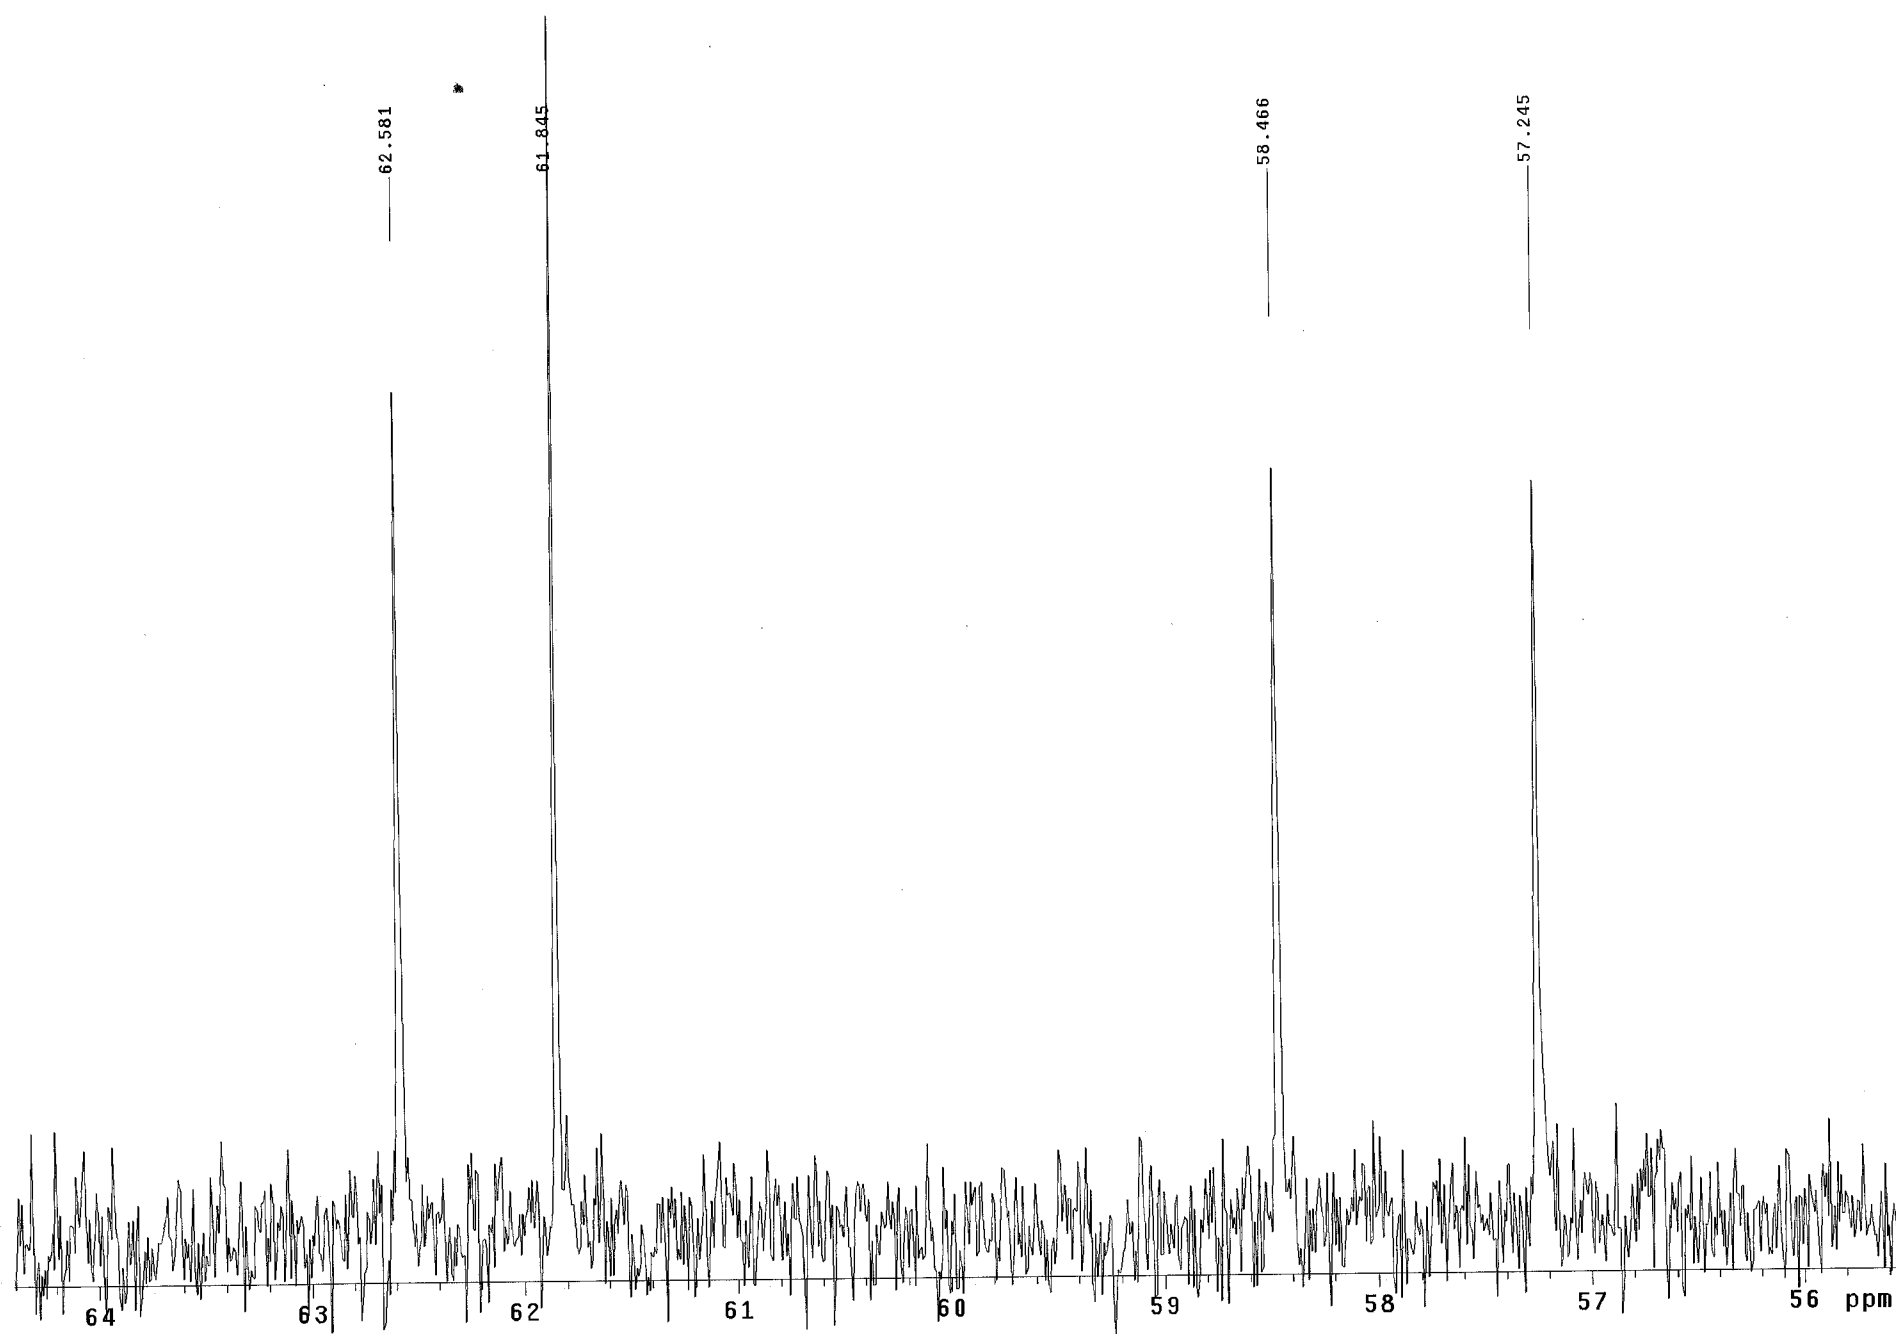



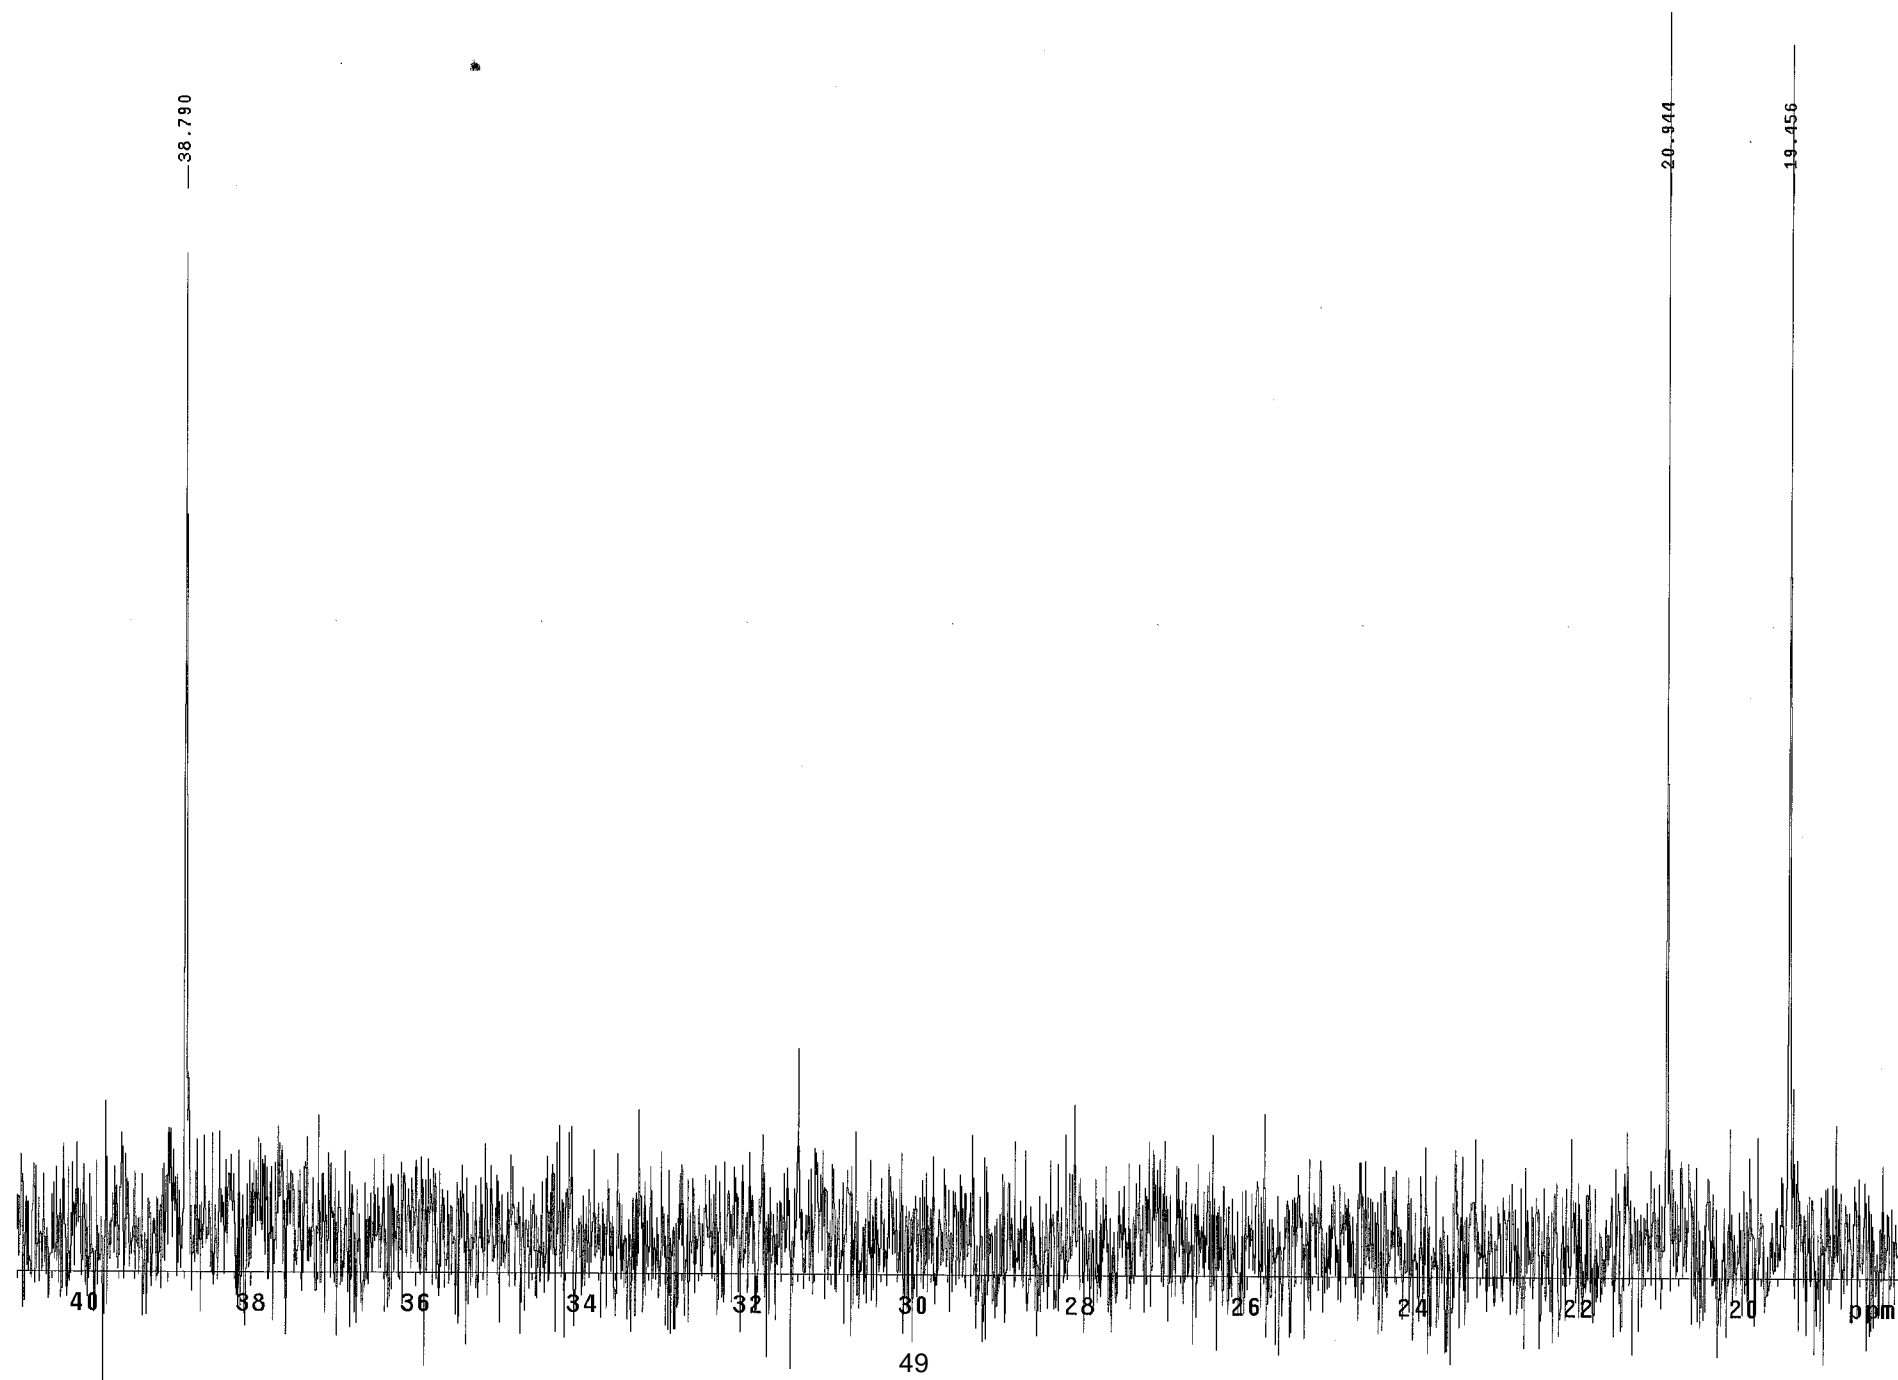

Std proton

File: xp

Pulse Sequence: s2pu1

Solvent: cdcl3

Ambient temperature

Operator: LDH

VNMR5-400 "Varian-NMR"

Relax. delay 1.000 sec

Pulse 45.0 degrees

Acq. time 2.049 sec

Width 6410.3 Hz

8 repetitions

OBSERVE H1, 399.7063370 MHz

DATA PROCESSING

Resol. enhancement -0.0 Hz

FT size 65536

Total time 0 min, 30 sec

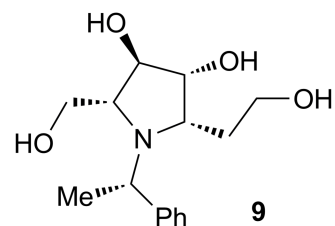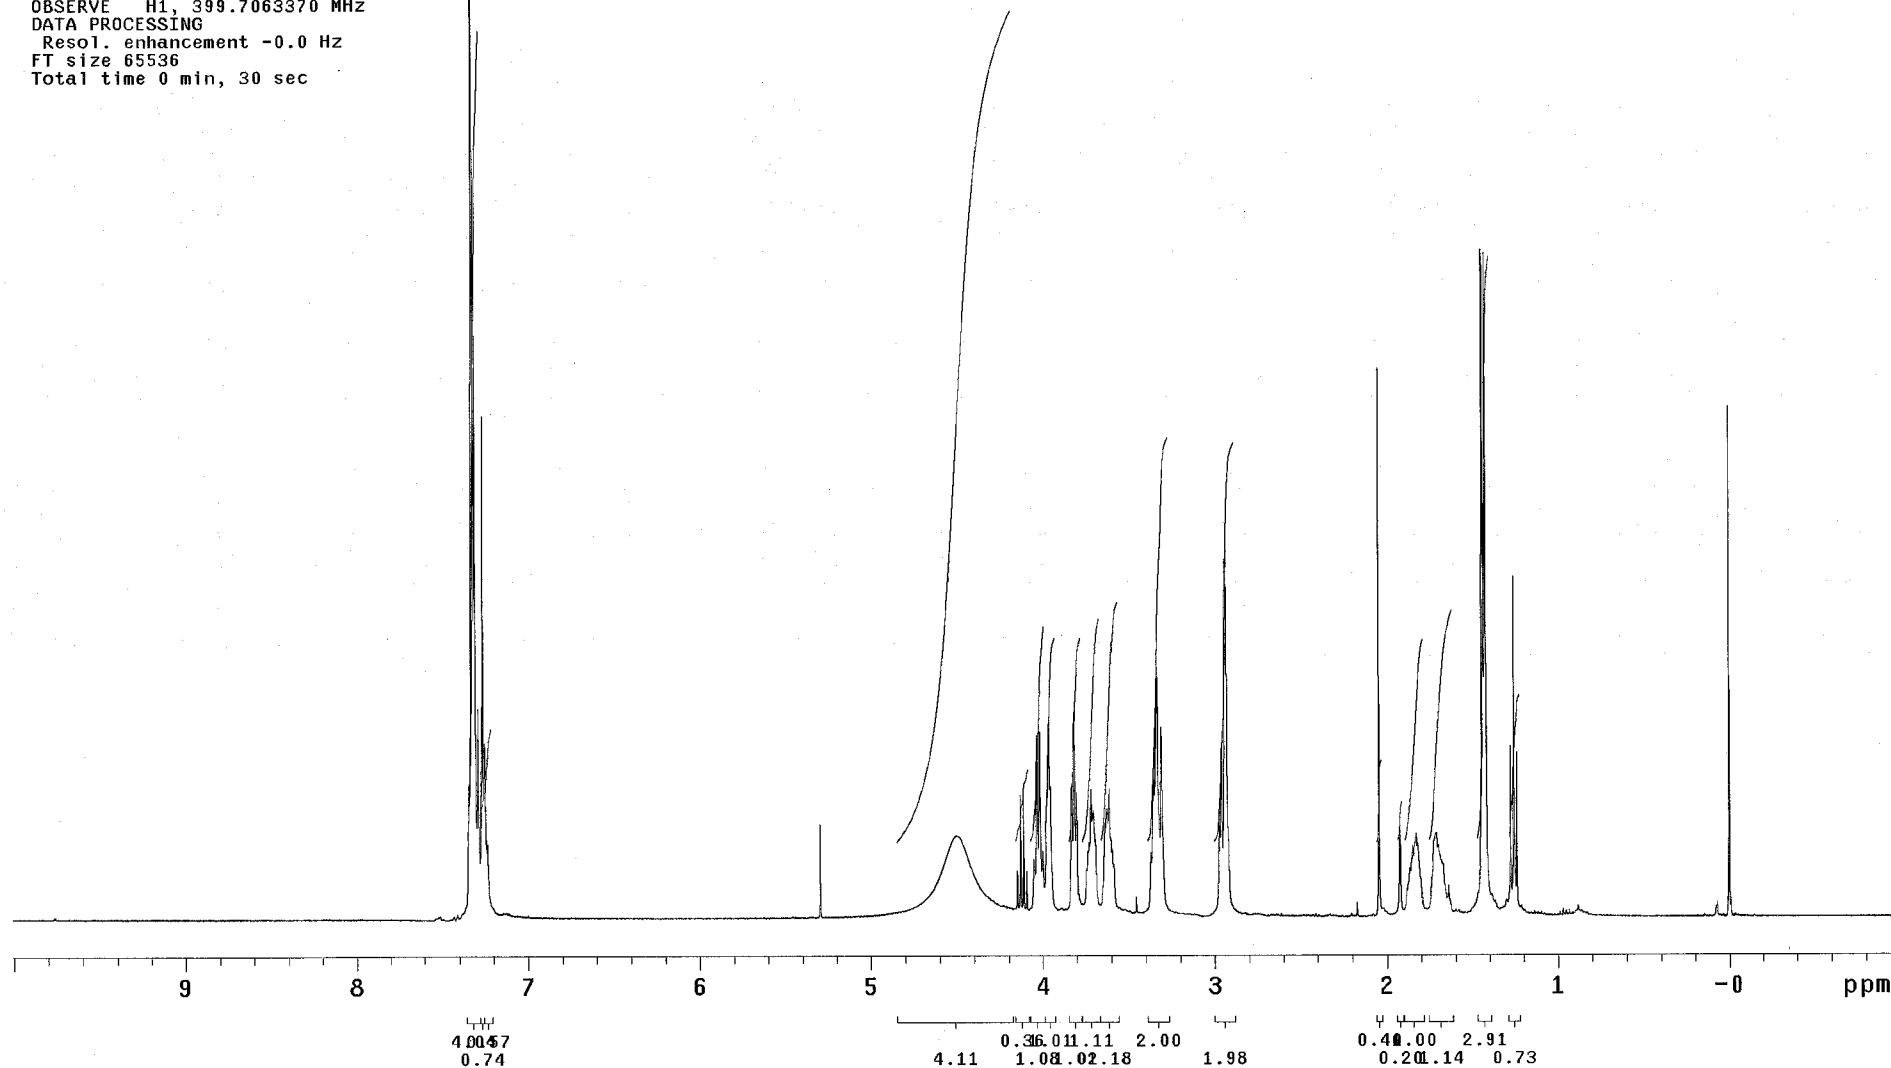

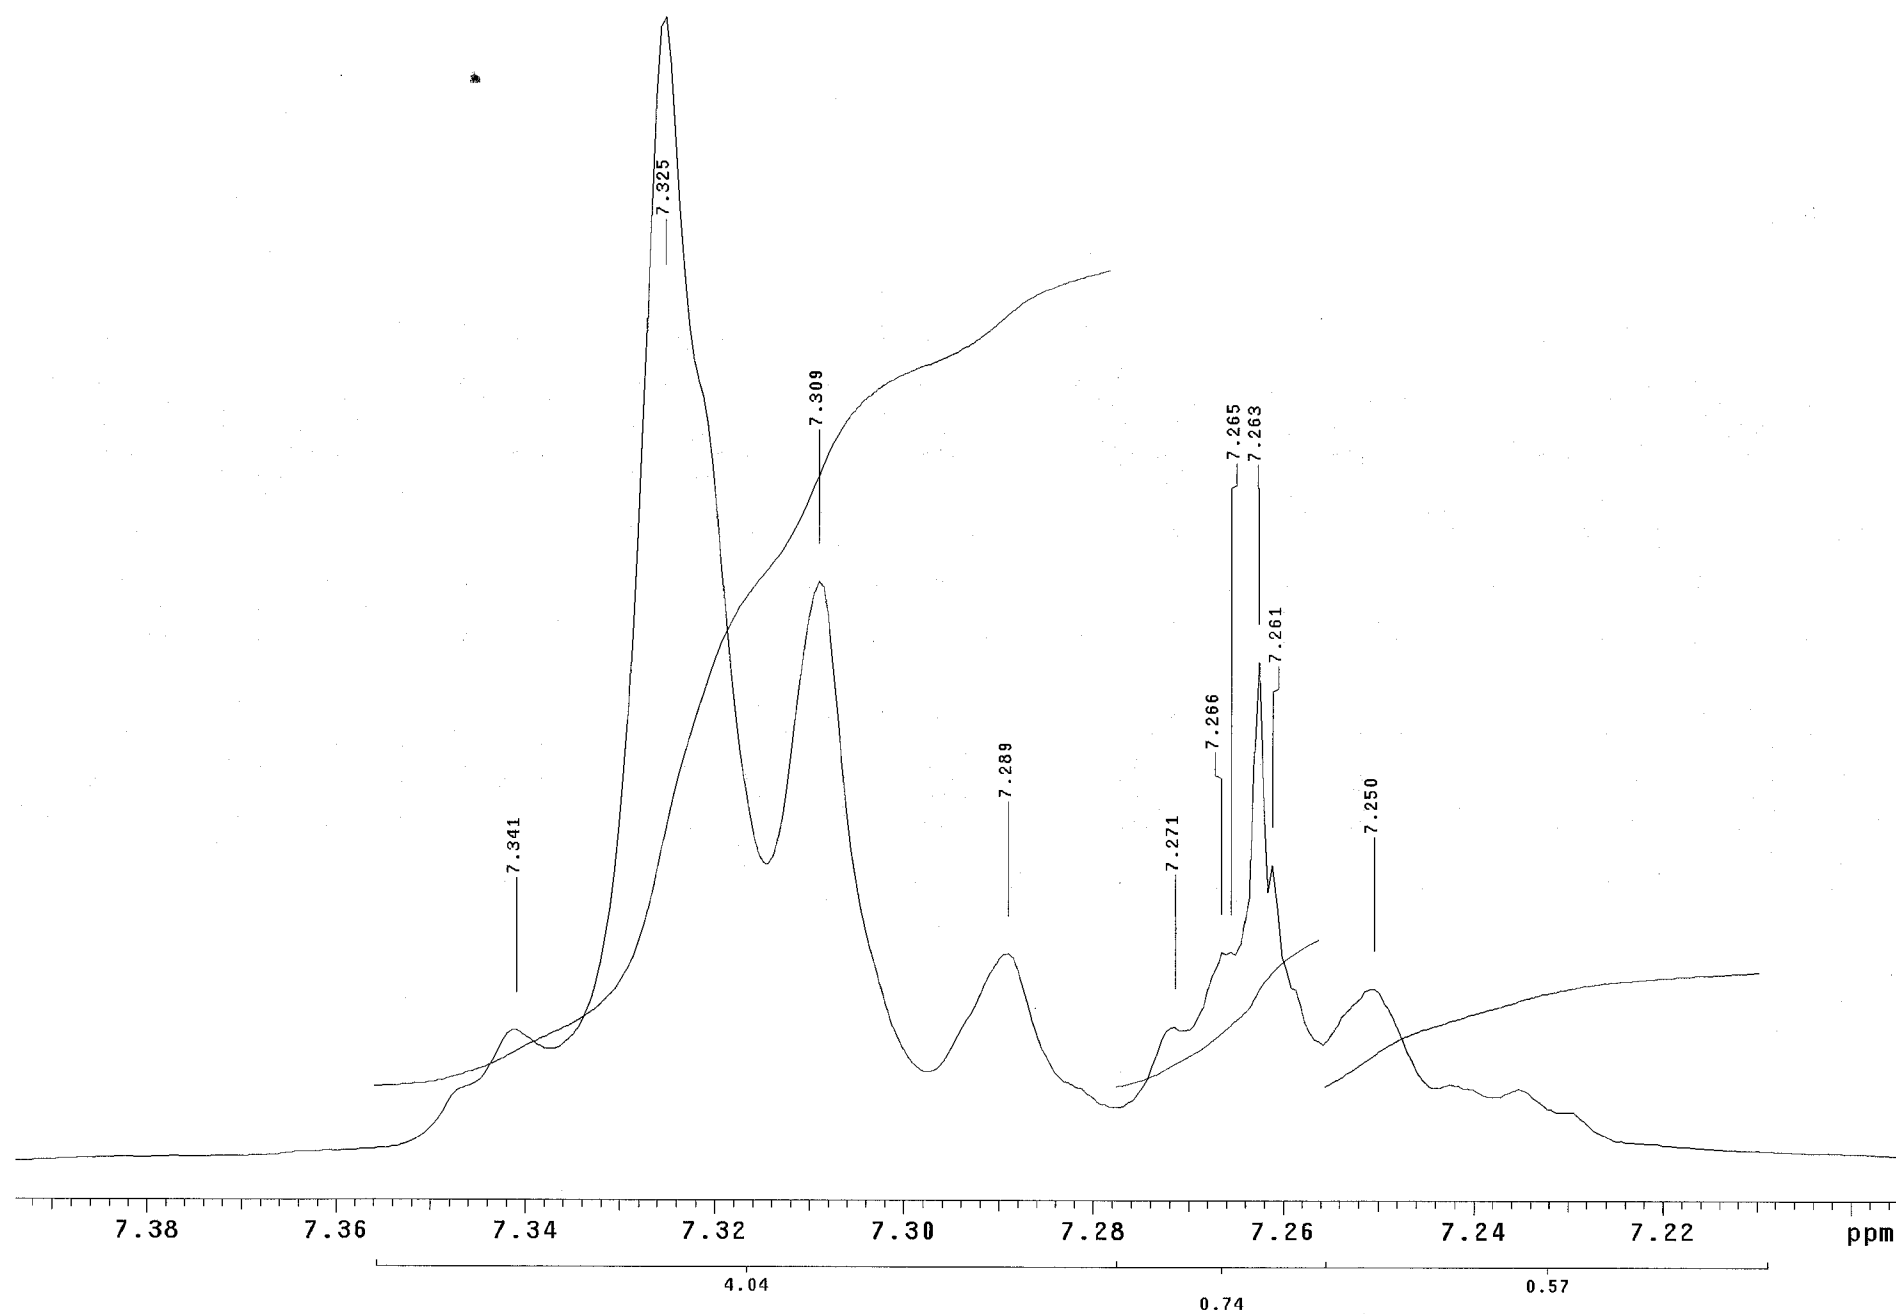

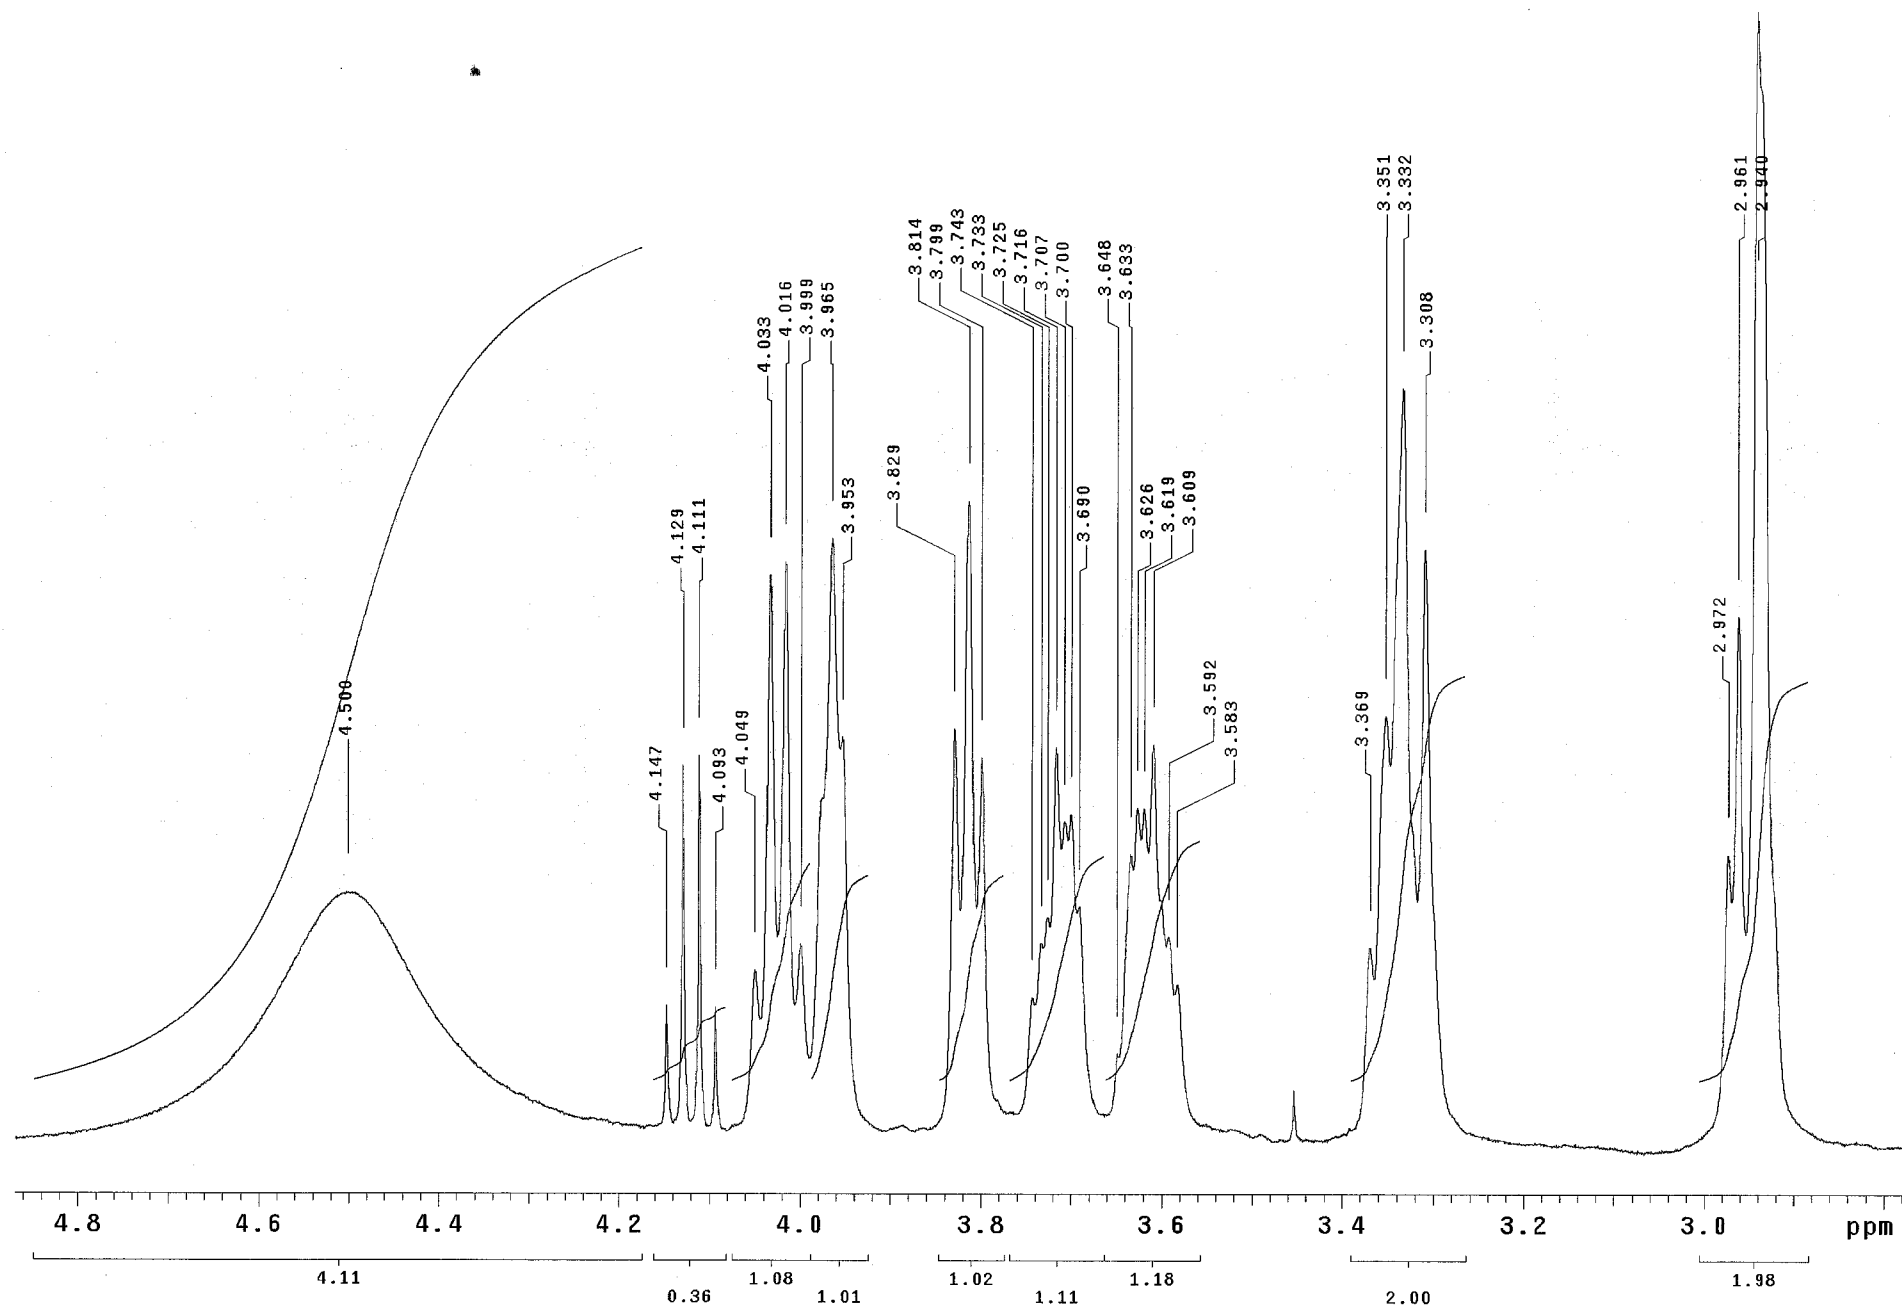

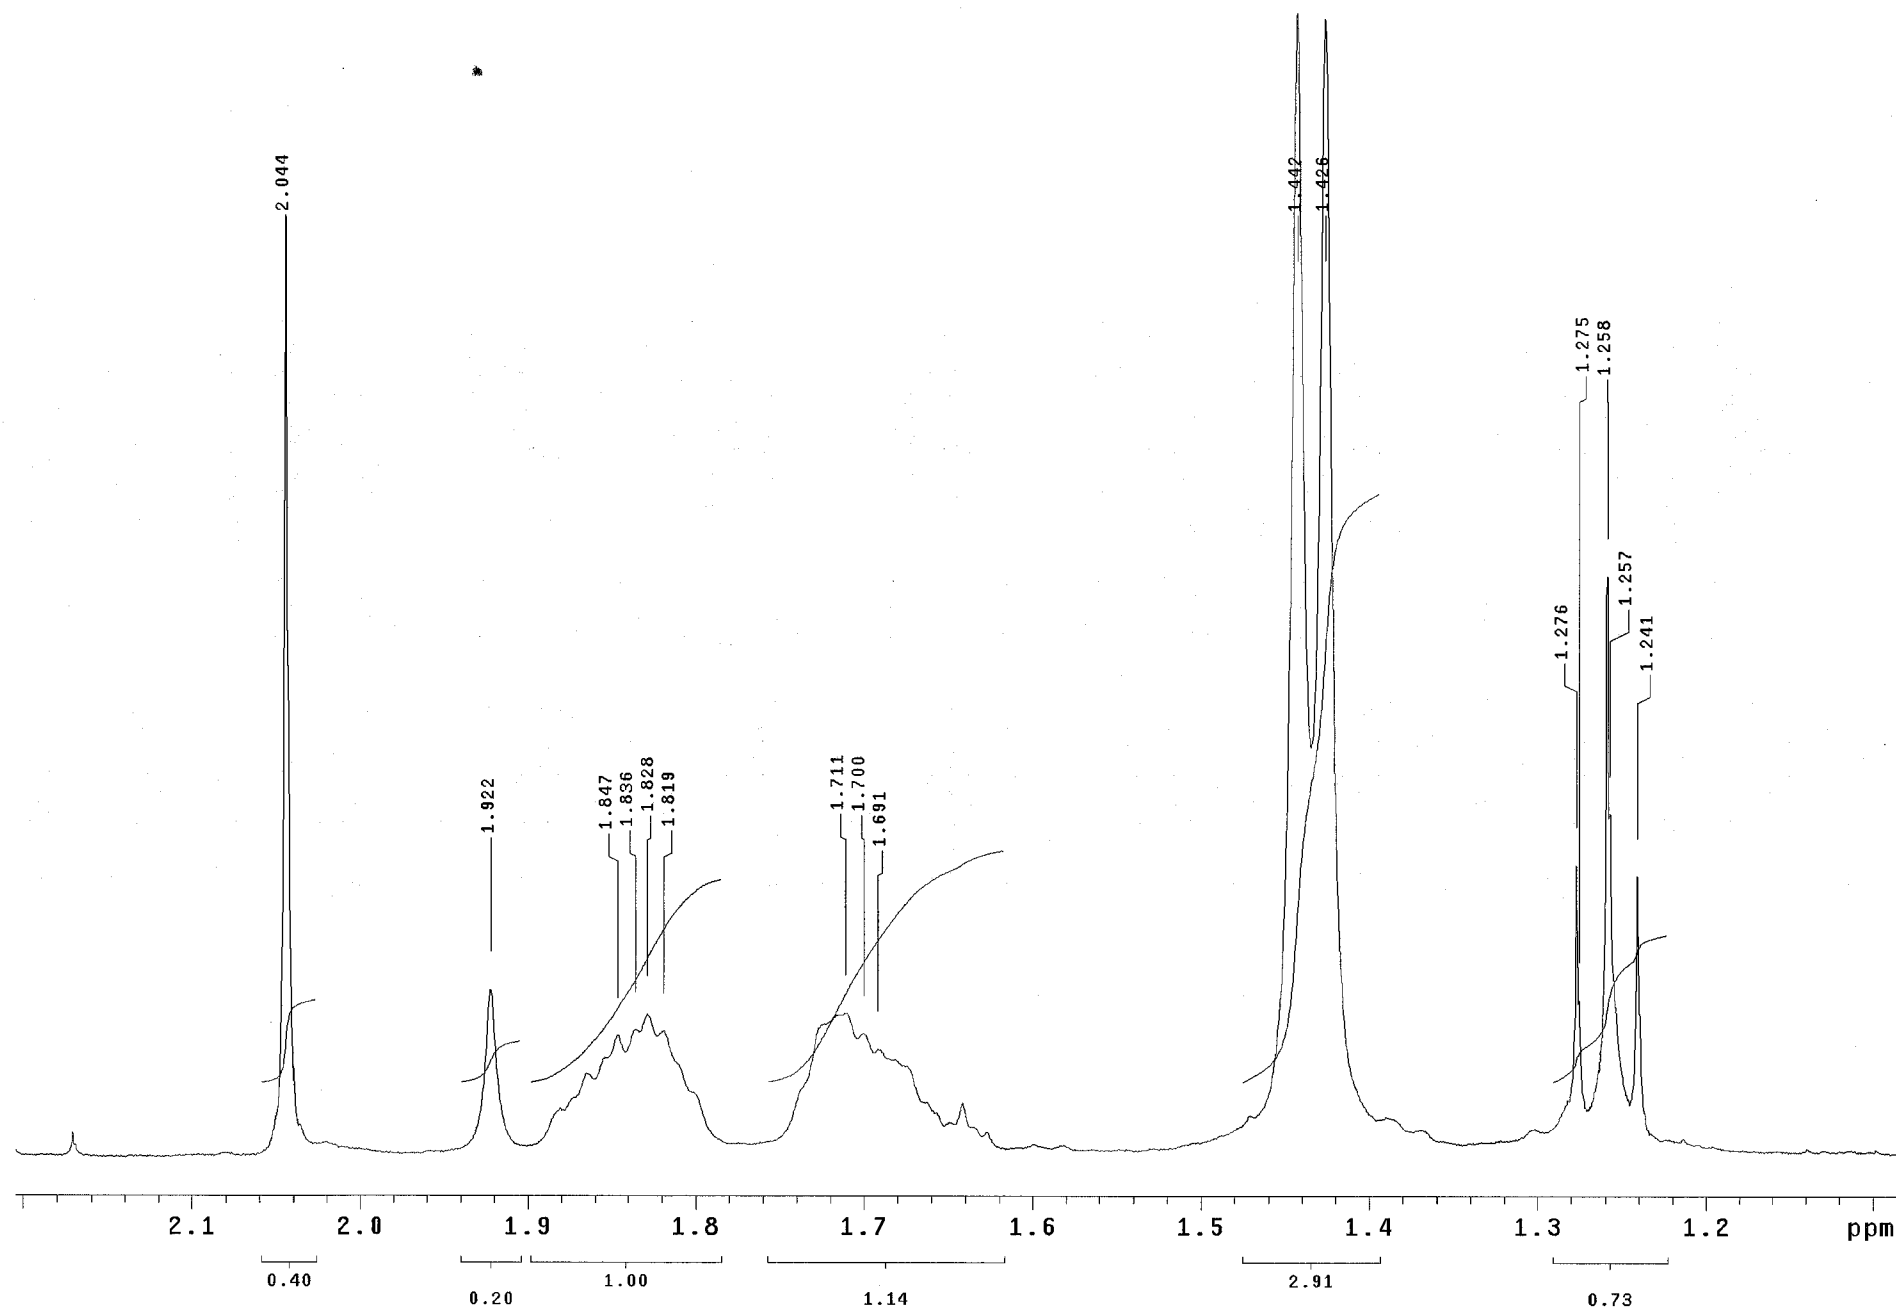

Std carbon

File: xp

Pulse Sequence: s2pu1

Solvent: cdc13

Temp. 25.0 C / 298.1 K

Operator: LWK

VNMRS-400 "Varian-NMR"

Relax. delay 1.000 sec

Pulse 45.0 degrees

Acq. time 1.300 sec

Width 24509.8 Hz

460 repetitions

OBSERVE C13, 100.4988692 MHz

DECOUPLE H1, 399.6790285 MHz

Power 37 dB

continuously on

WALTZ-16 modulated

DATA PROCESSING

Line broadening 0.5 Hz

FT size 65536

Total time 1 hr, 16 min, 41 sec

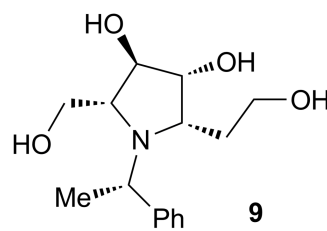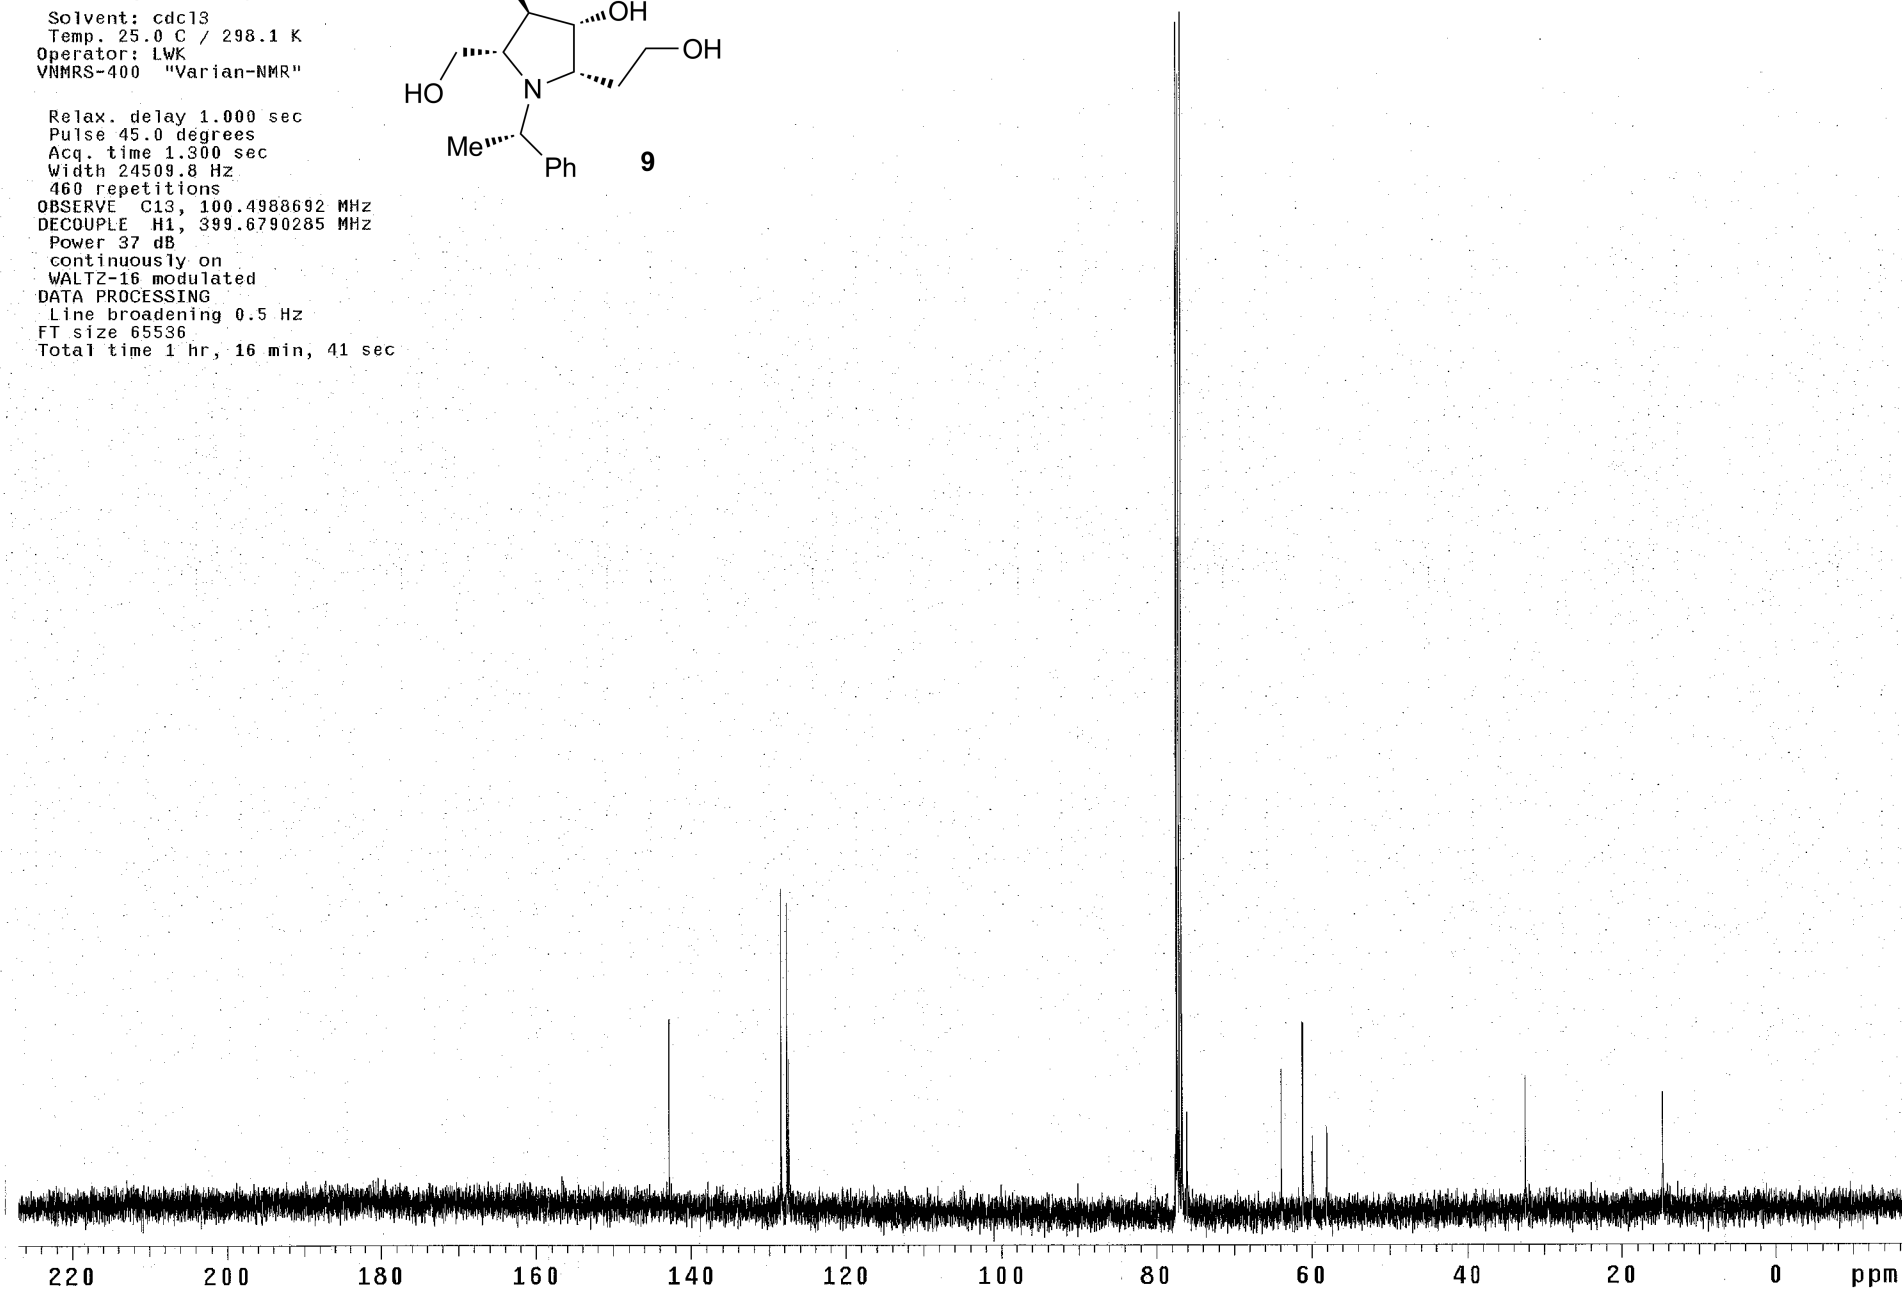

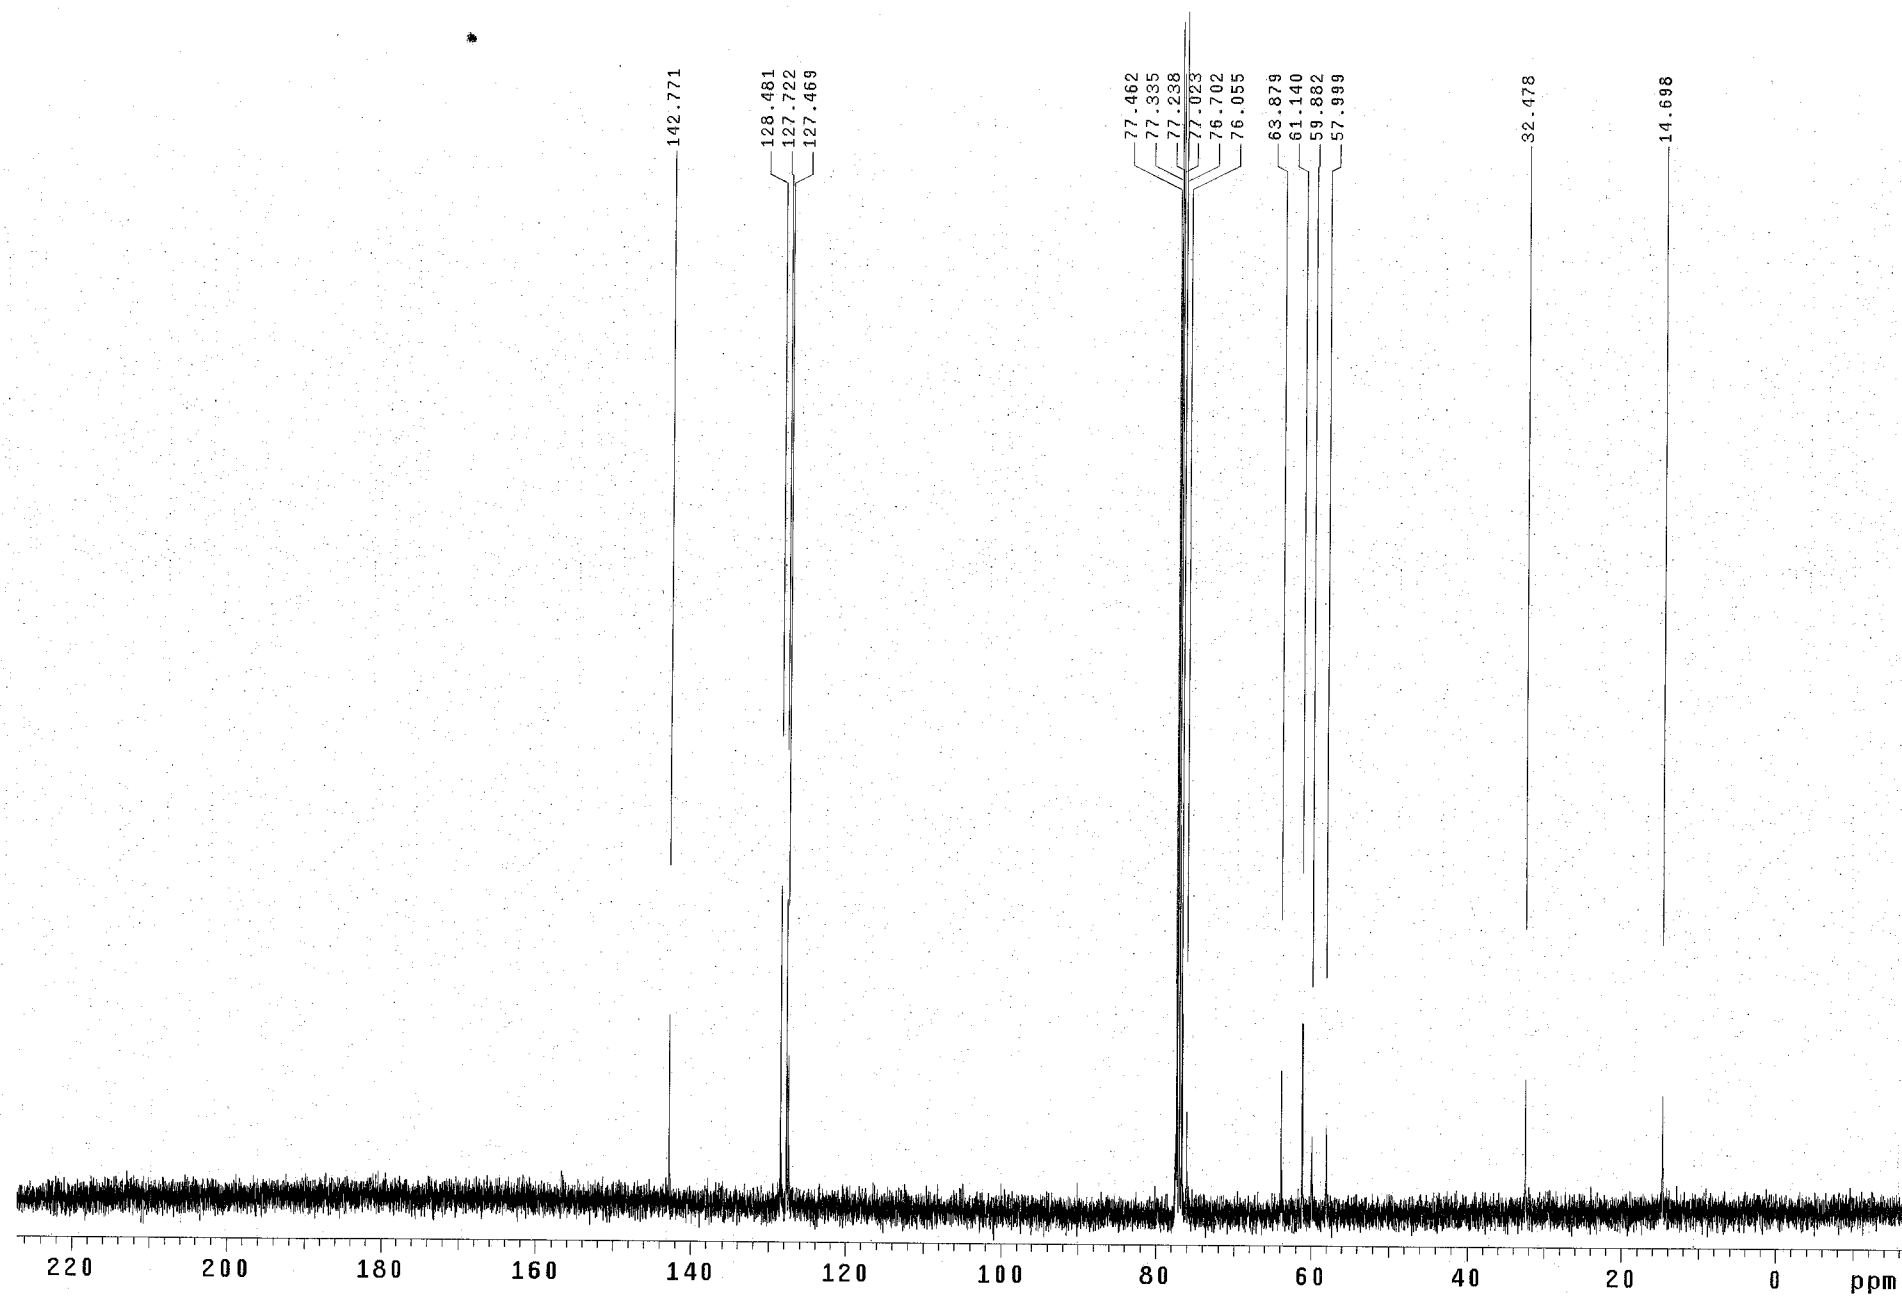

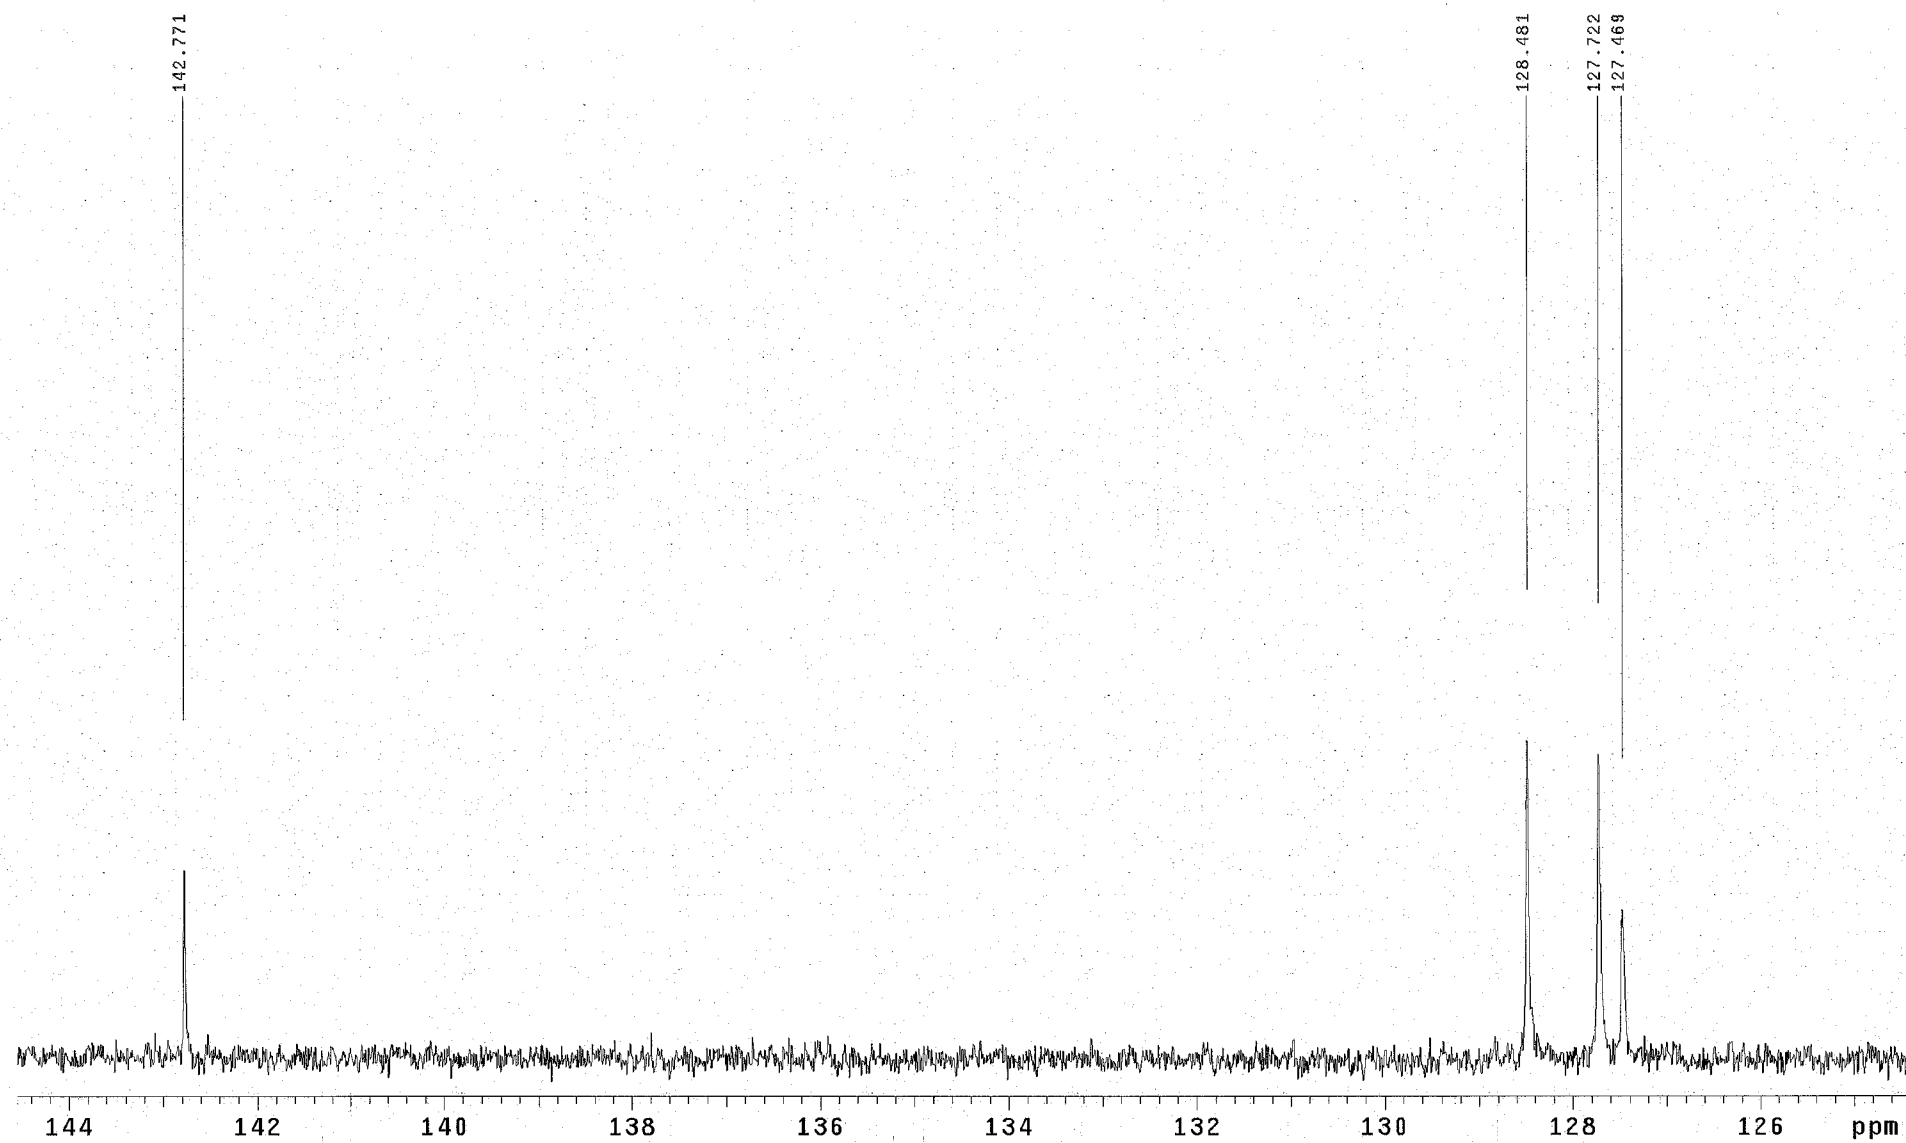



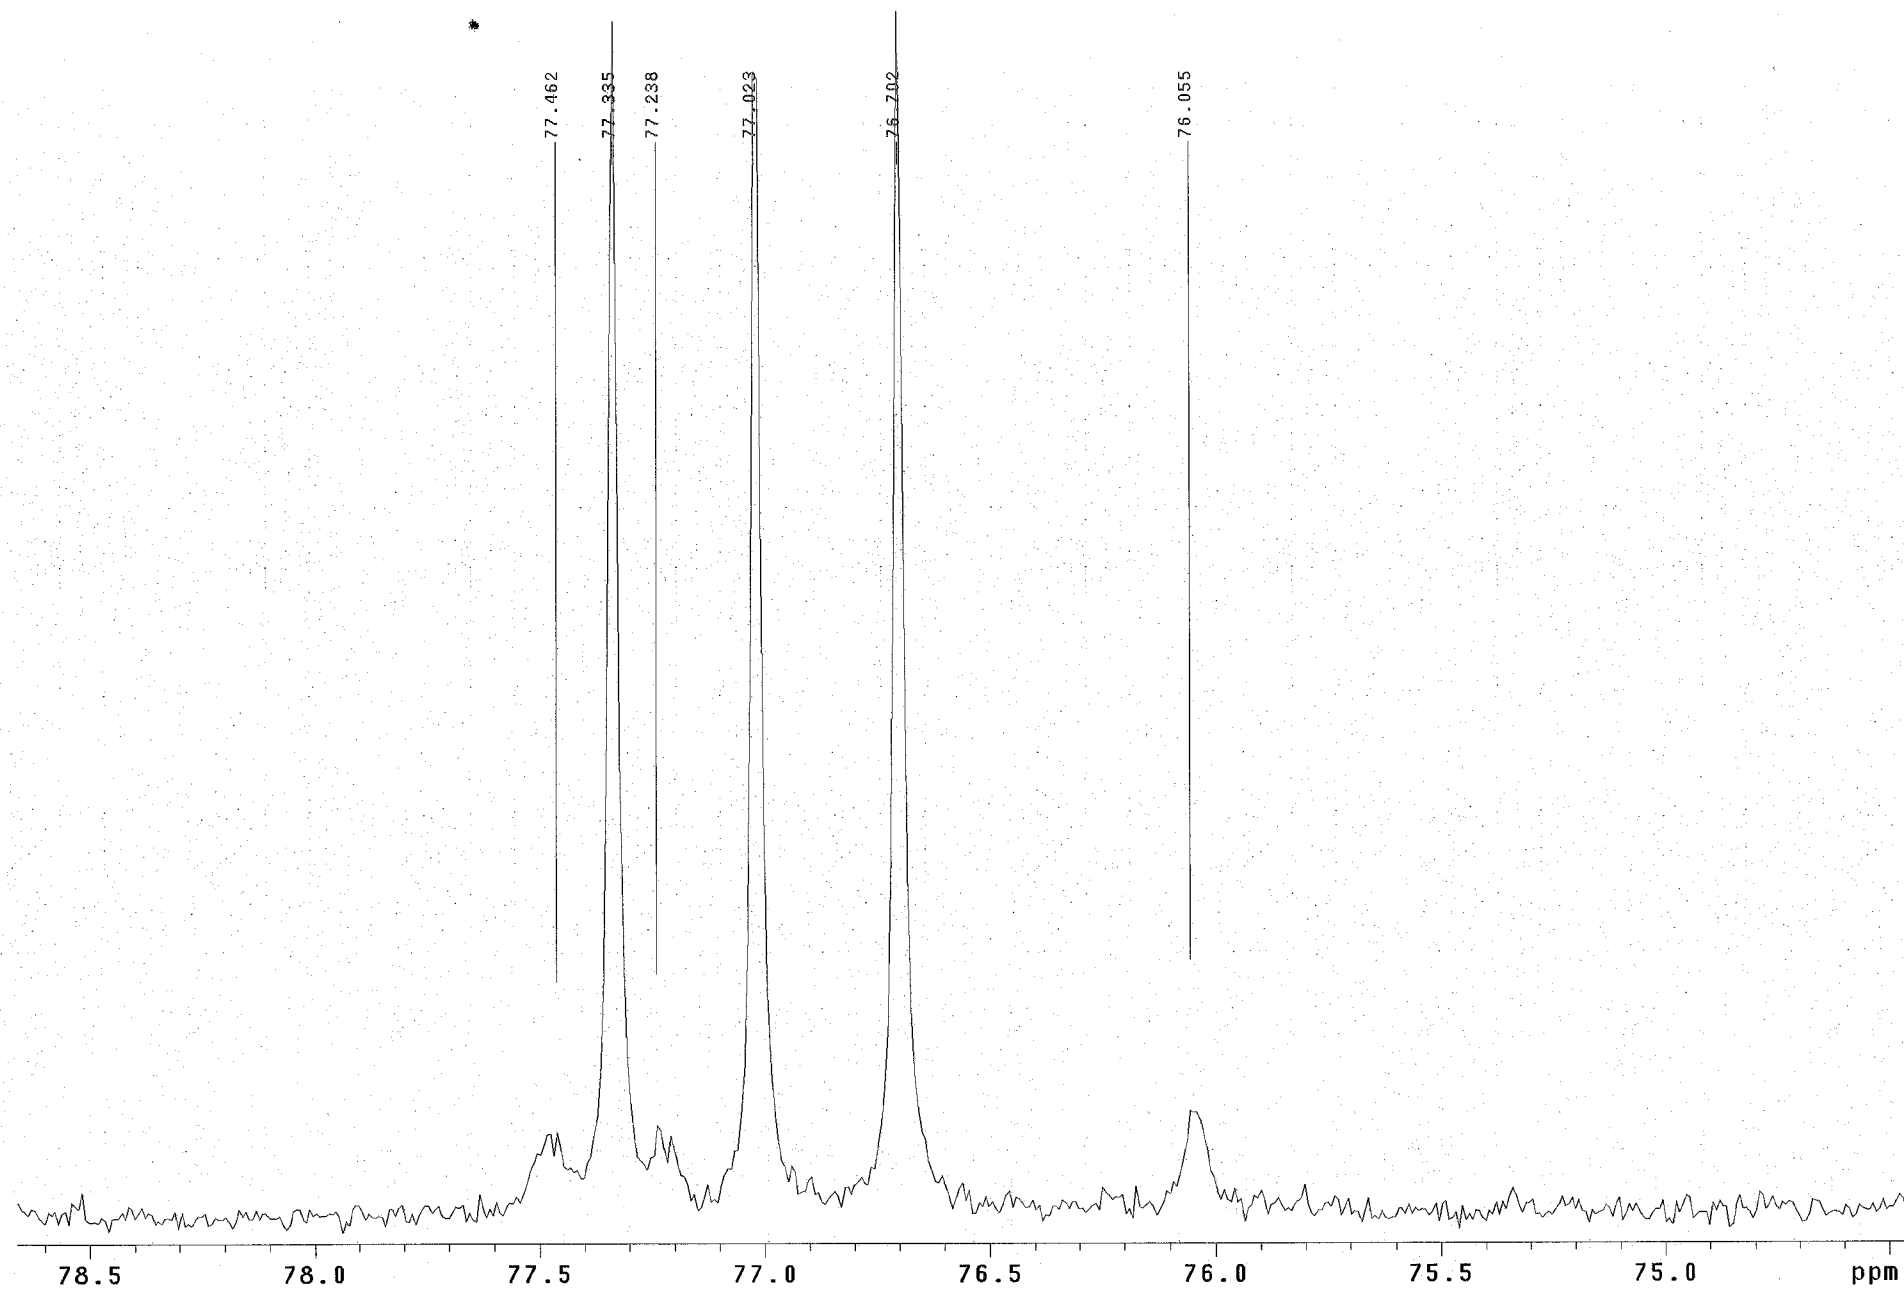

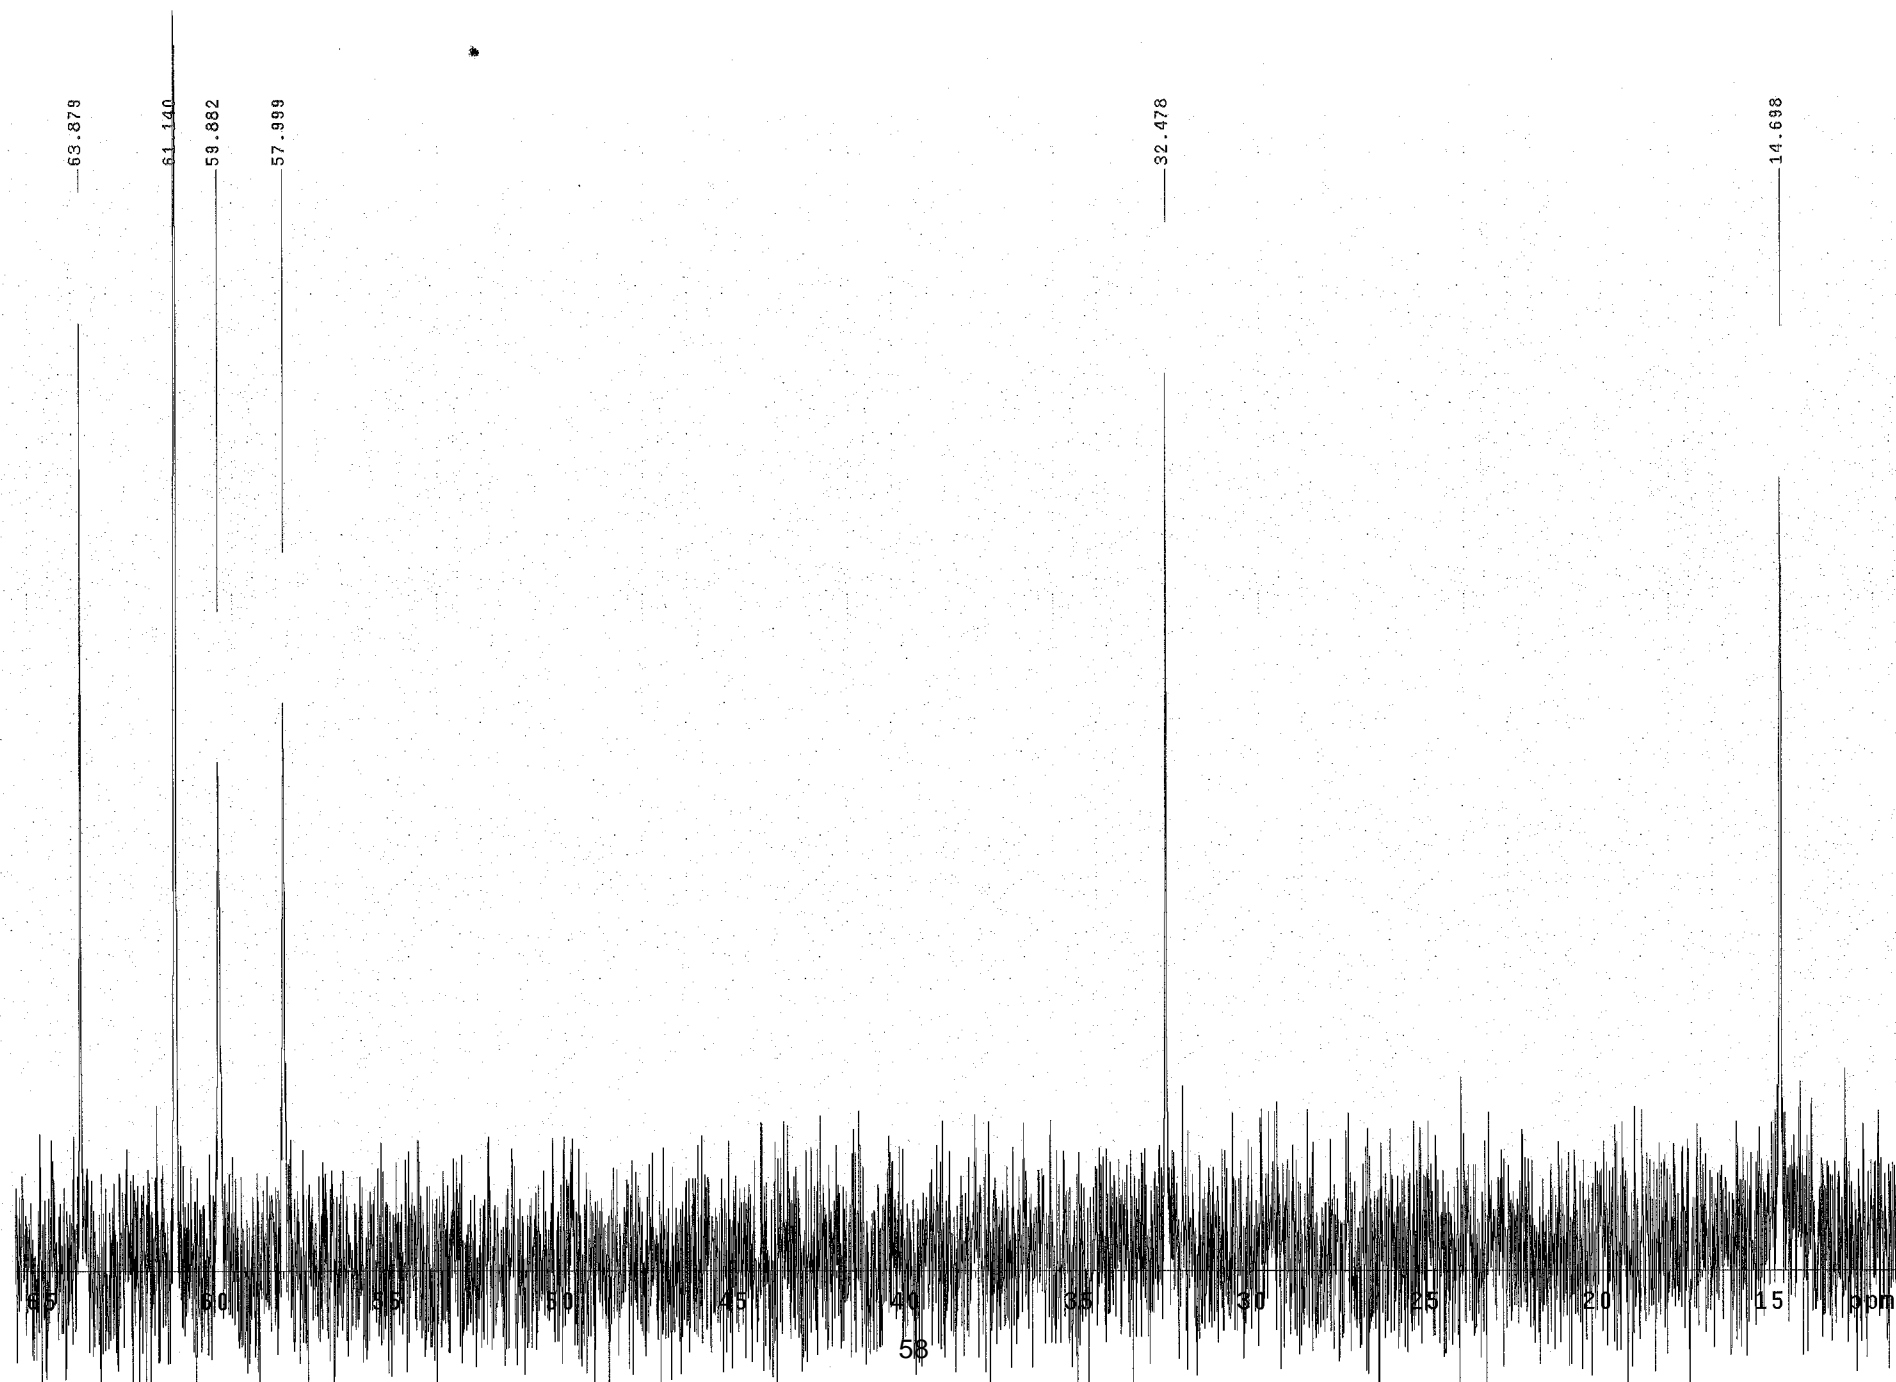

Std proton

File: xp

Pulse Sequence: s2pu1

Solvent: d2o

Ambient temperature

Operator: LWK

VNMRS-400 "Varian-NMR"

Relax. delay 1.000 sec

Pulse 45.0 degrees

Acq. time 2.049 sec

Width 6410.3 Hz

16 repetitions

OBSERVE H1, 399.6981948 MHz

DATA PROCESSING

Resol. enhancement -0.0 Hz

FT size 65536

Total time 0 min, 55 sec

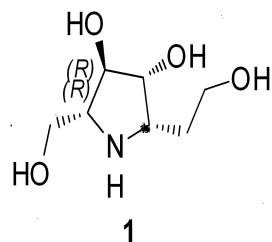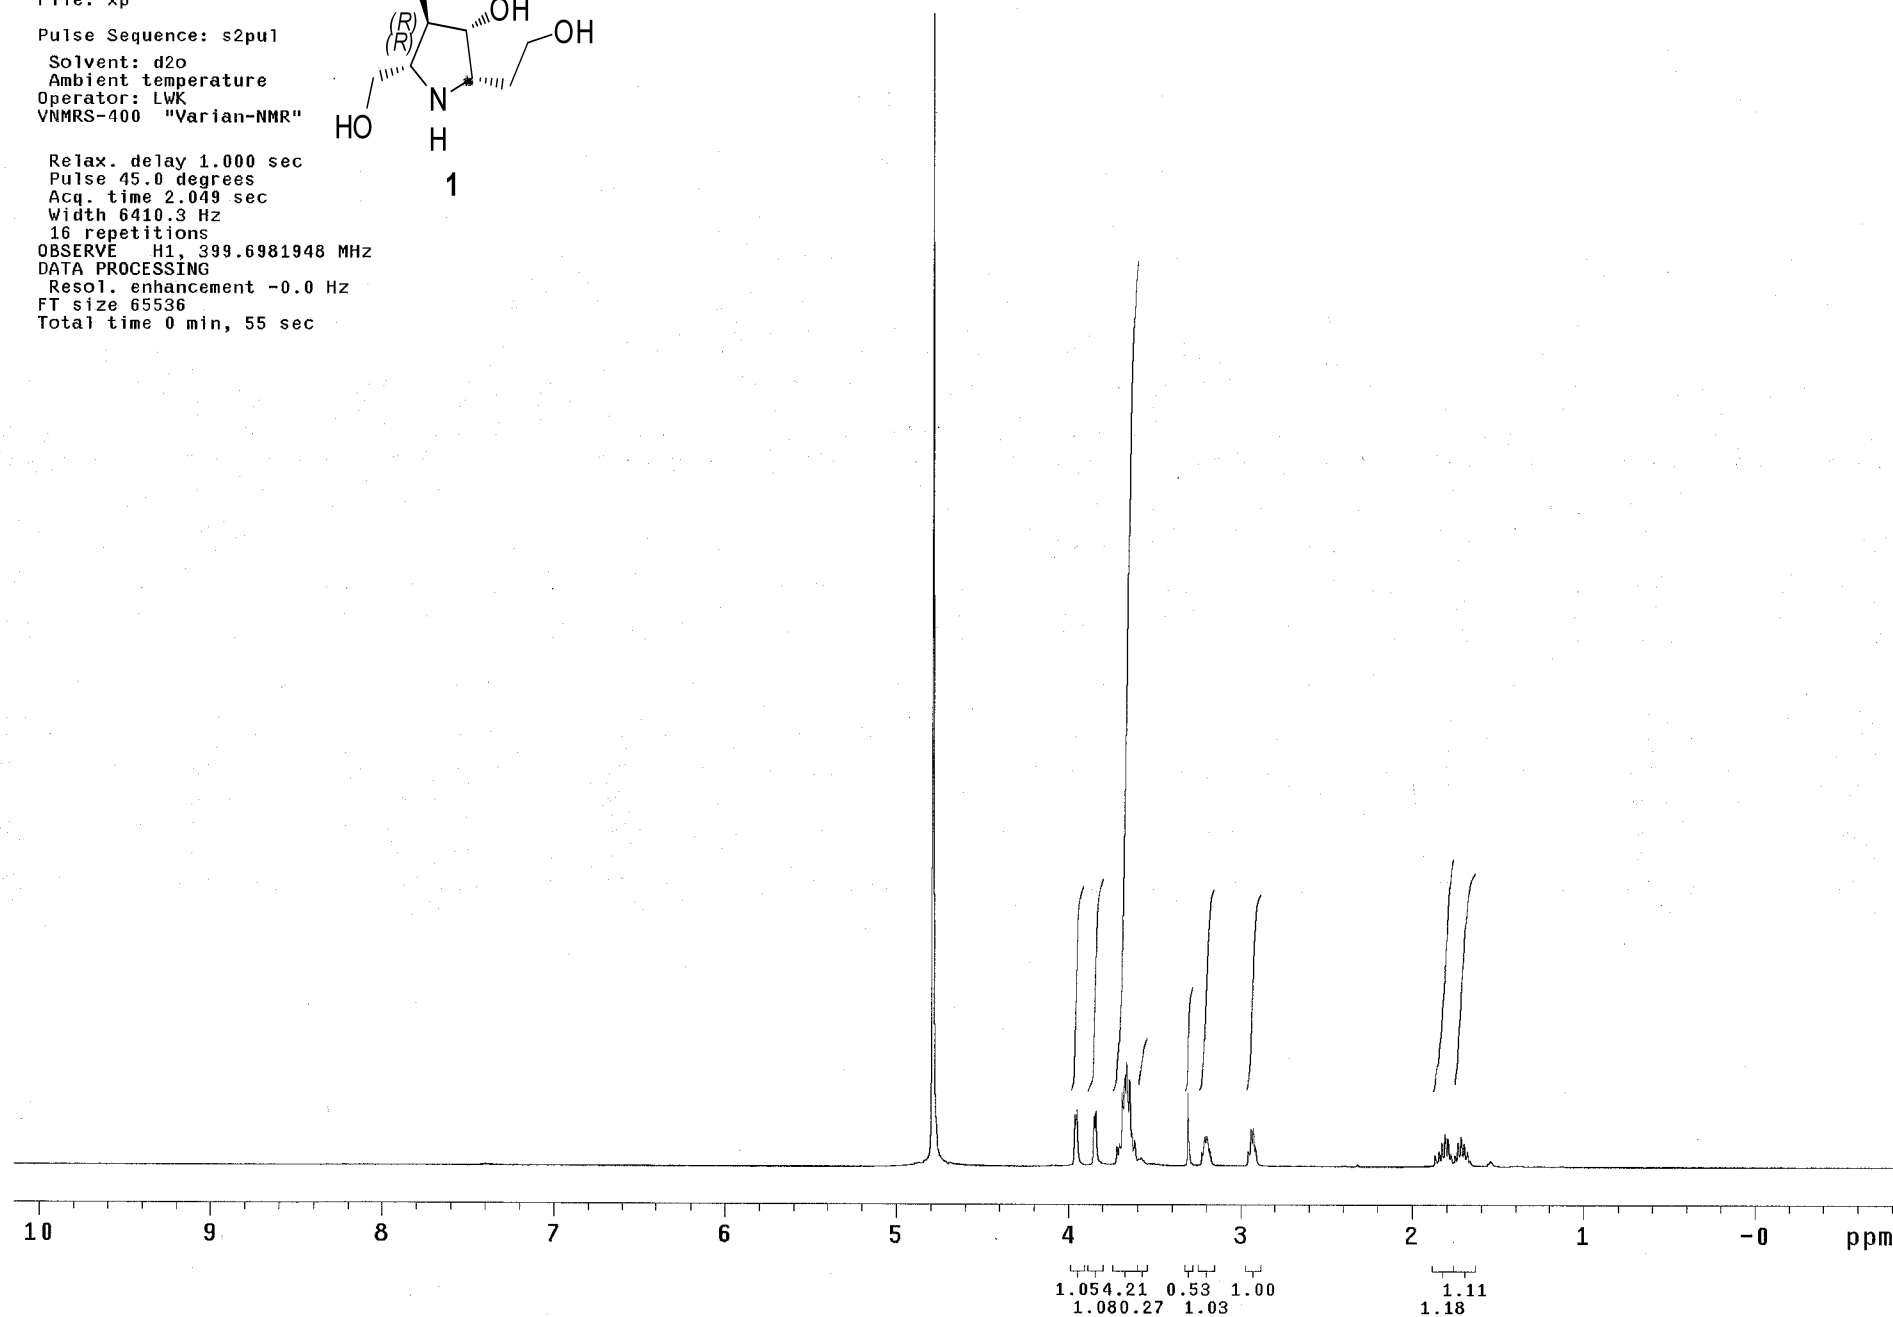

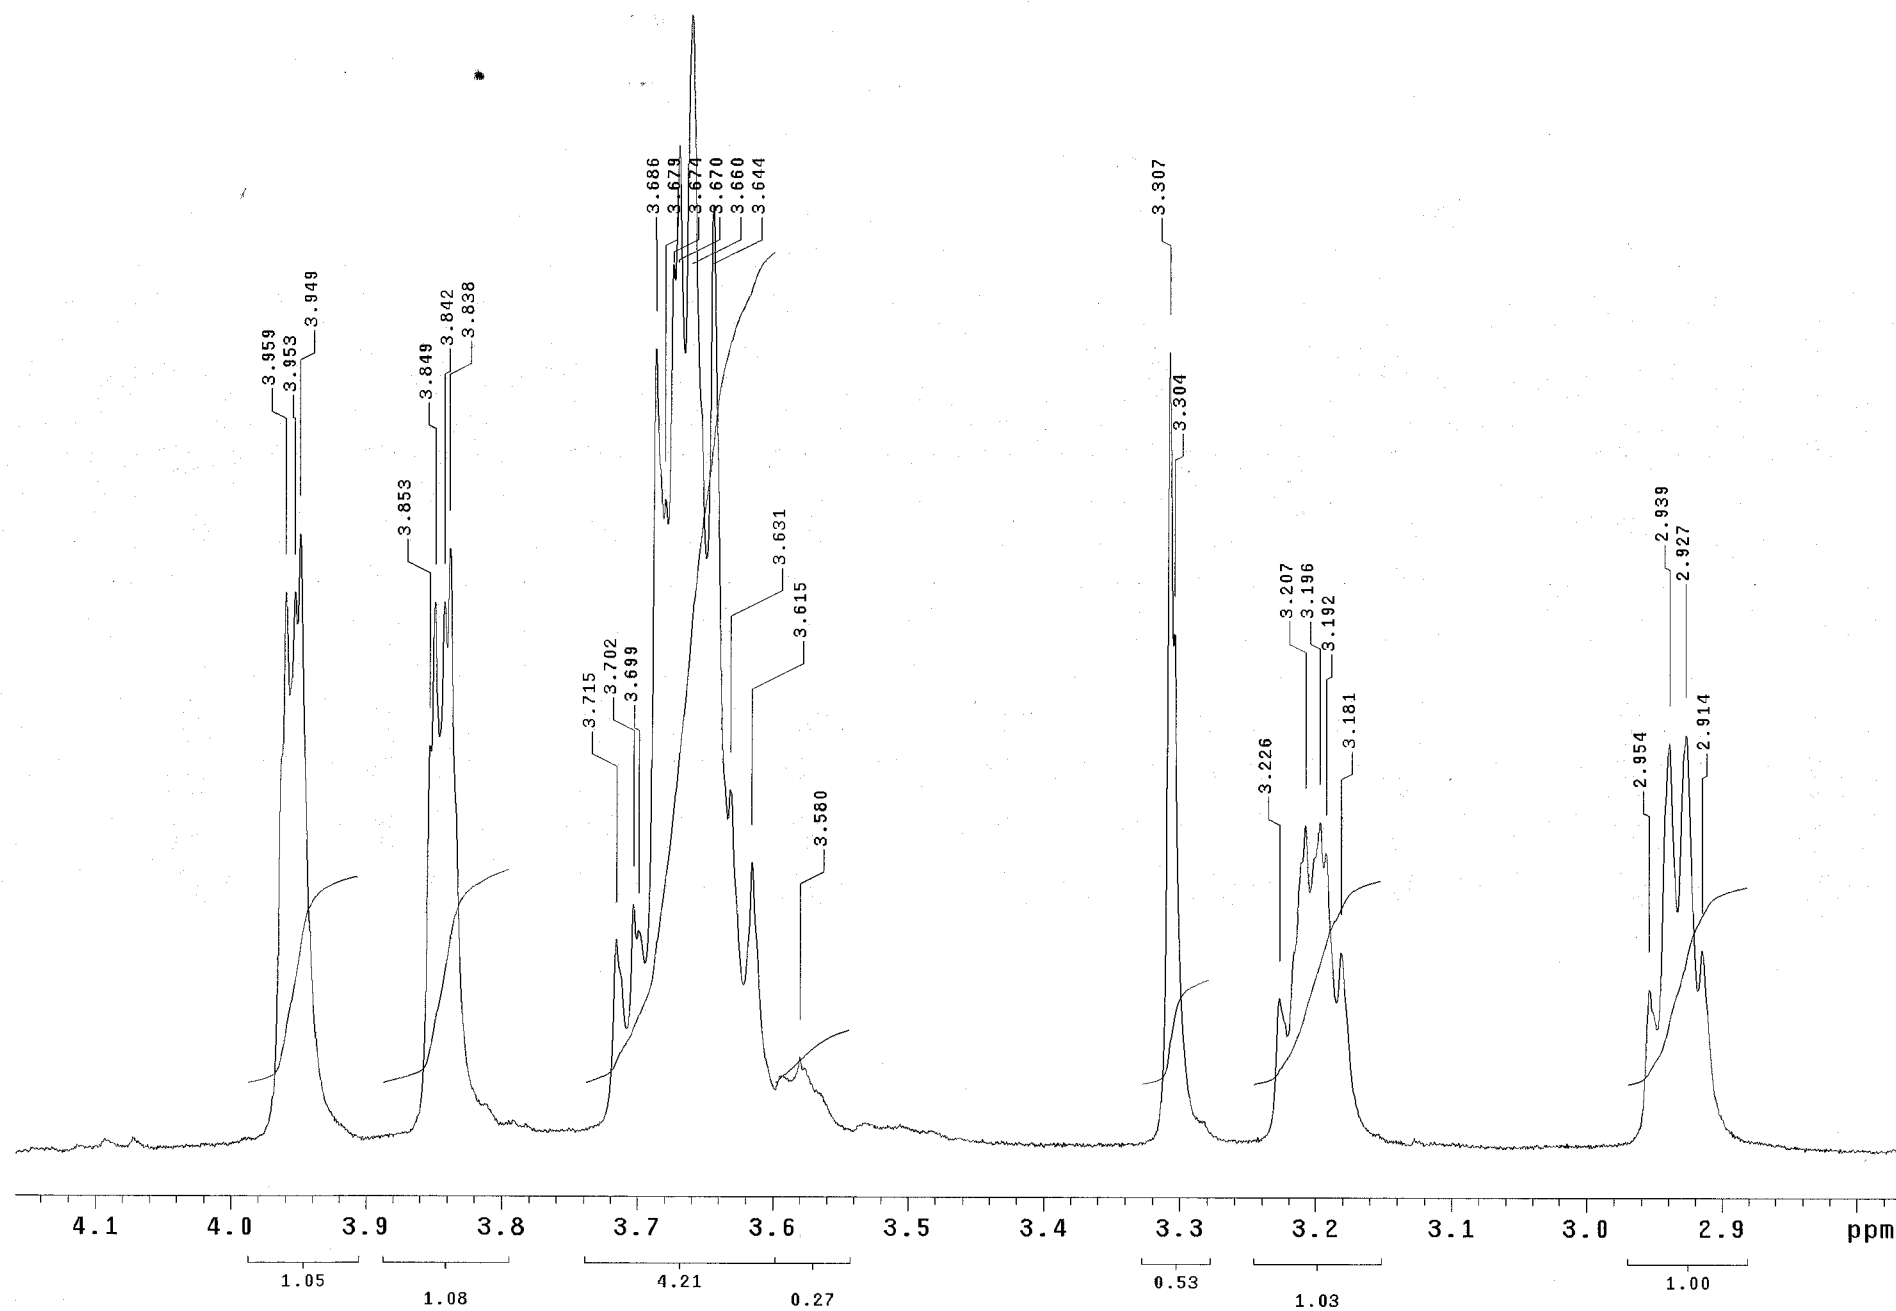

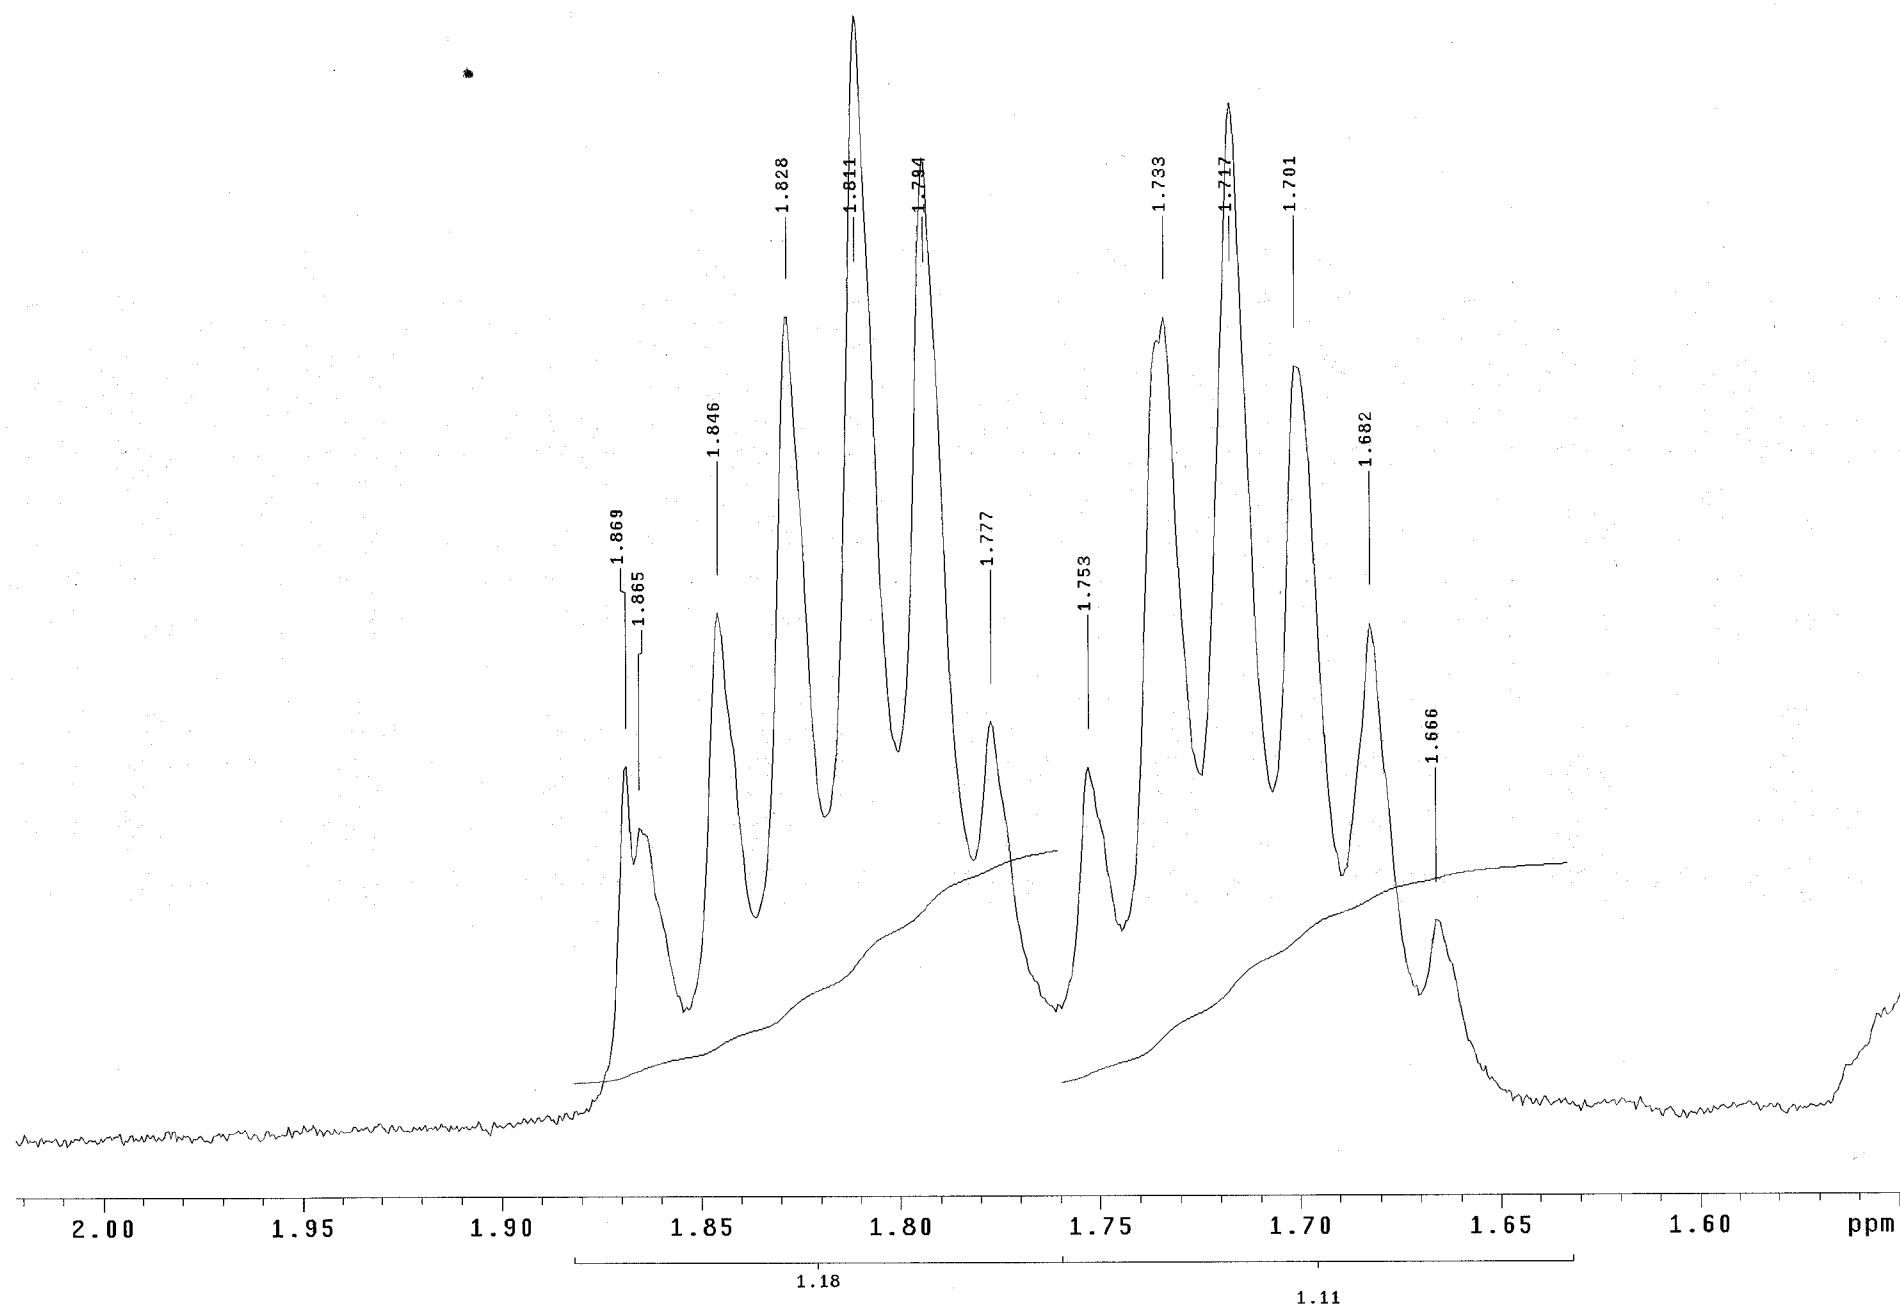

Std carbon

File: xp

Pulse Sequence: s2pul

Solvent: d2o

Ambient temperature

Operator: LWK

VNMRS-400 "Varian-NMR"

Relax. delay 1.000 sec

Pulse 45.0 degrees

Acq. time 1.300 sec

Width 24509.8 Hz

320 repetitions

OBSERVE C13, 100.5097747 MHz

DECOUPLE H1, 399.7223993 MHz

Power 37 dB

continuously on

WALTZ-16 modulated

DATA PROCESSING

Line broadening 0.5 Hz

FT size 65536

Total time 1 hr, 16 min, 41 sec

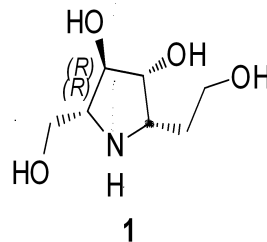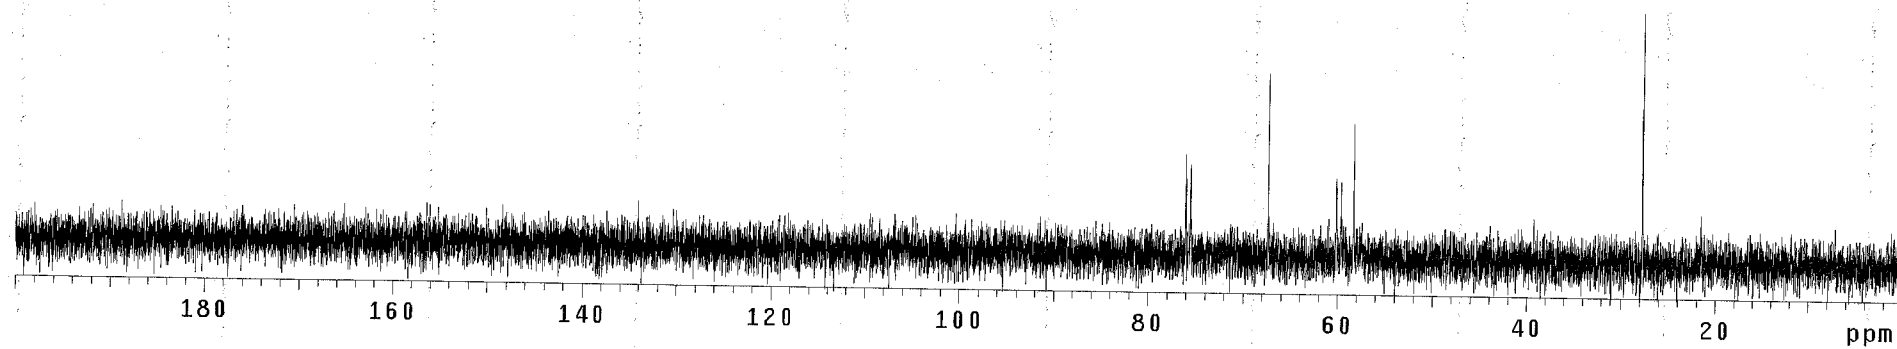

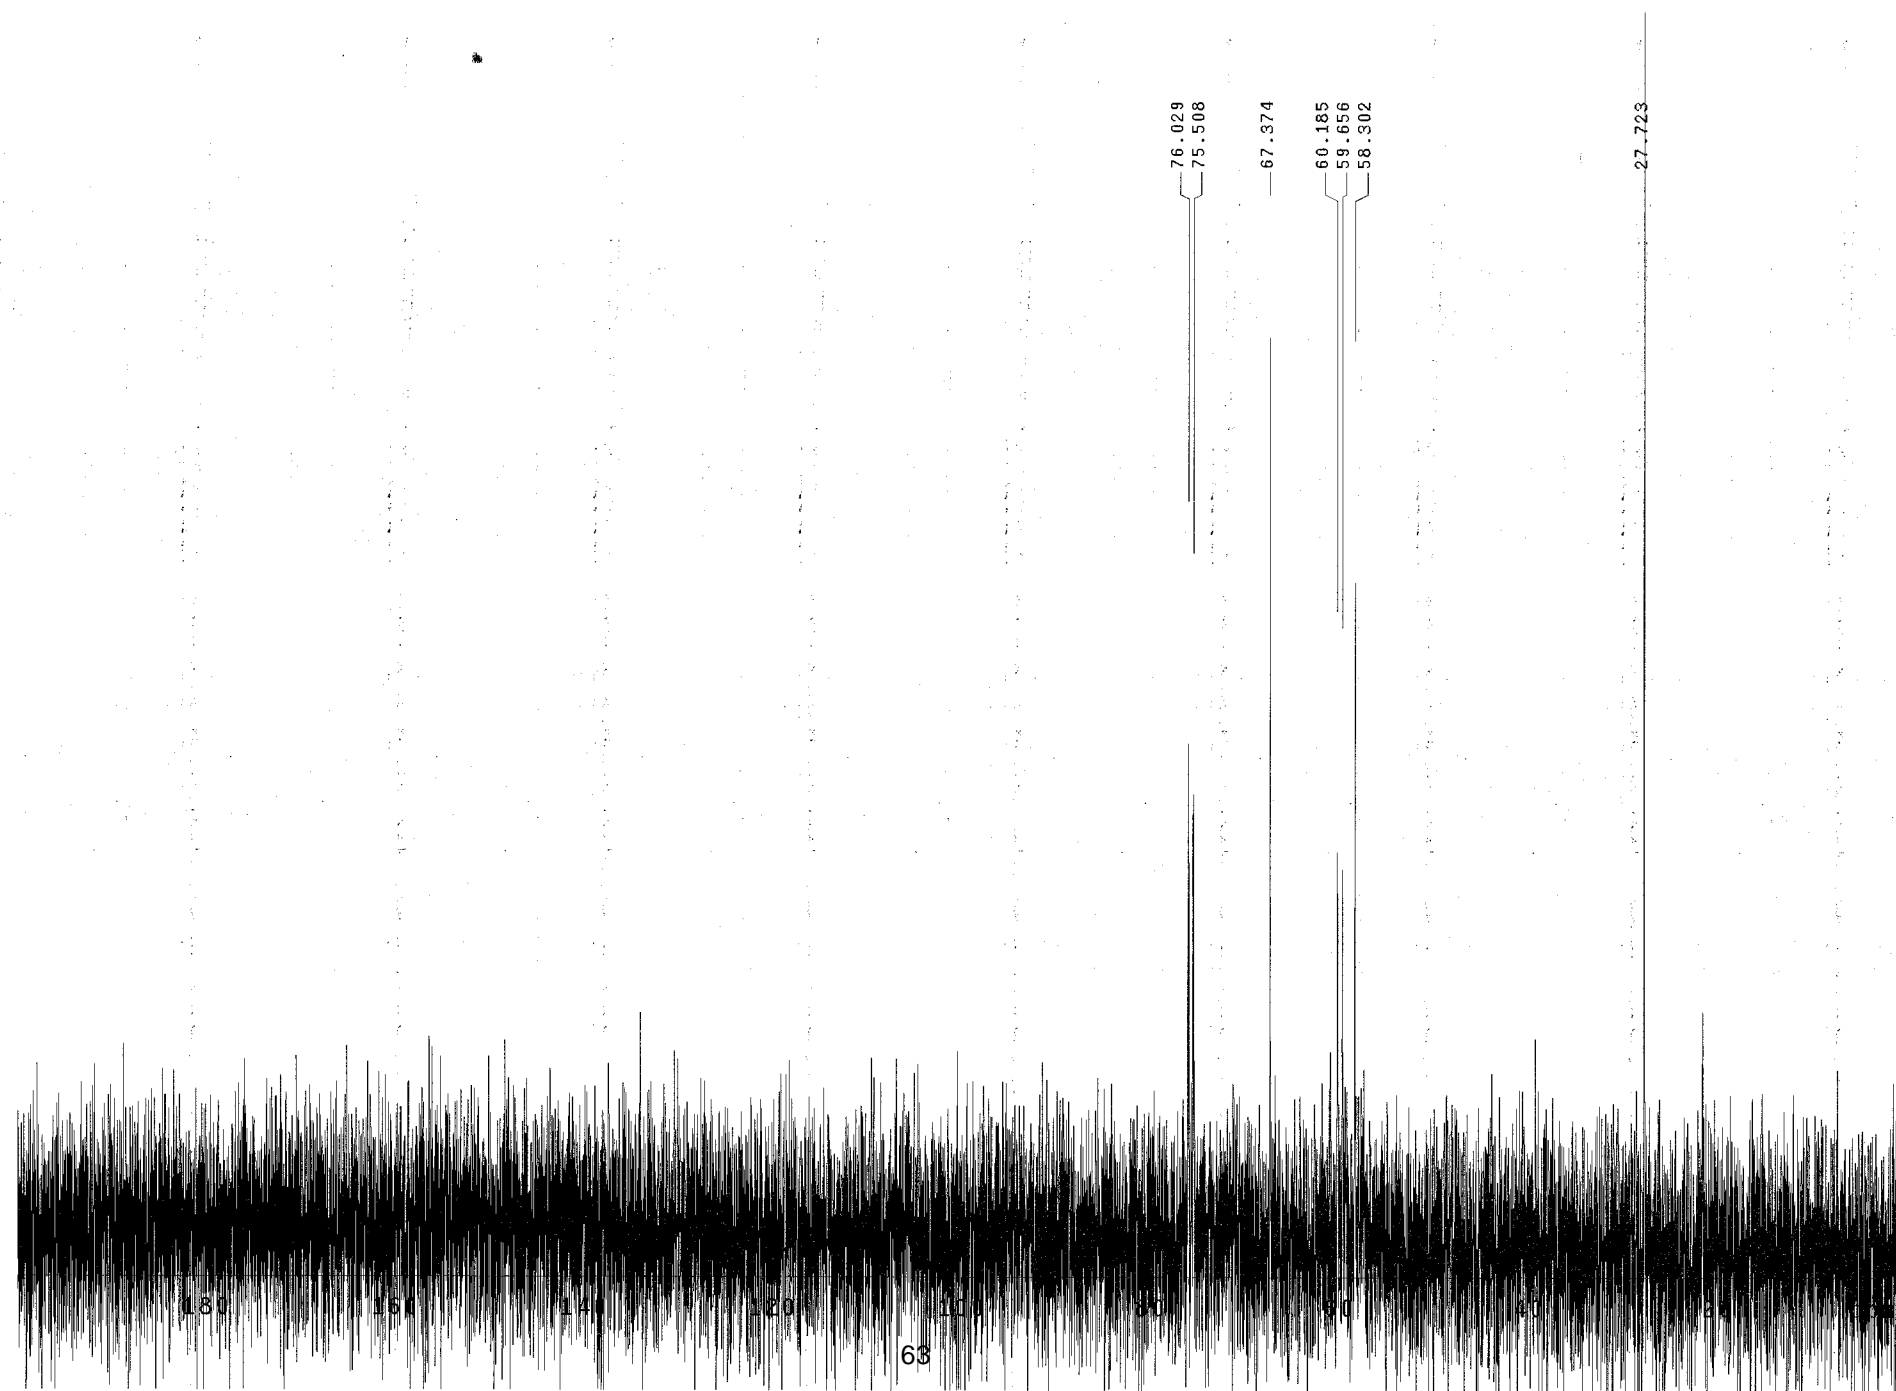

## 2. X-Ray Crystal Structure of Compound **6**

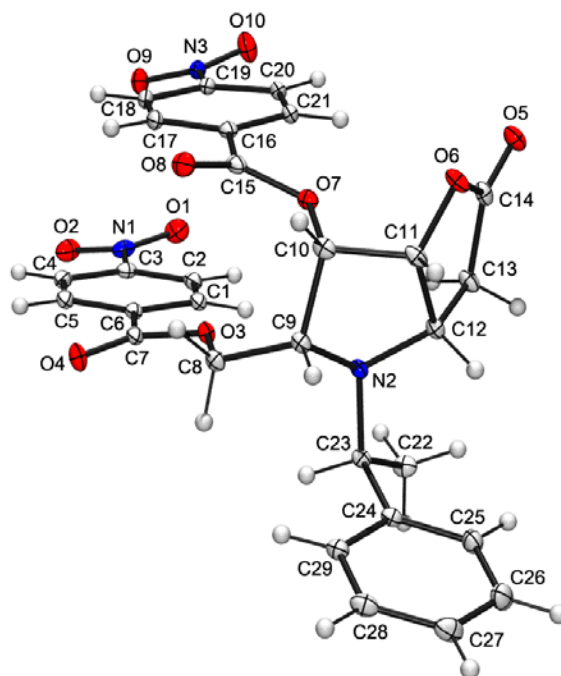

**Figure 1.** X-ray crystal structure of **6** with thermal ellipsoids drawn at the 30% probability level.

**X-ray Crystallography.** A single crystal of **6**, was picked from solutions by a nylon loop (Hampton Research Co.) on a hand made cooper plate mounted inside a liquid N<sub>2</sub> Dewar vessel at *ca.* −40 °C and mounted on a goniometer head in a N<sub>2</sub> cryostream. Data collections were carried out on a Bruker SMART AXS diffractometer equipped with a monochromator in the Mo K $\alpha$  ( $\lambda$  = 0.71073 Å) incident beam. The CCD data were integrated and scaled using the Bruker-SAINT software package, and the structure was solved and refined using SHELXTL V 6.12.<sup>[1]</sup> Hydrogen atoms were



located in the calculated positions. Crystal data for **6**: C<sub>29</sub>H<sub>25</sub>N<sub>3</sub>O<sub>10</sub>, Monoclinic, *P2(1)/c*, *Z* = 4, *a* = 9.4026(2), *b* = 32.1434(7), *c* = 9.1405(2) Å, *β* = 110.9000(10) °, *V* = 2580.78(10) Å<sup>3</sup>, *μ* = 0.114 mm<sup>-1</sup>, *ρ*<sub>calcd</sub> = 1.481 g/cm<sup>3</sup>, *R*<sub>1</sub> = 0.0357, *wR*<sub>2</sub> = 0.0912 for 6427 unique reflections, 380 variables. The crystallographic data for **6** are listed in Table 1, and Table 2 lists the selected bond distances and angles. CCDC-902981 for **6** contains the supplementary crystallographic data for this paper. These data can be obtained free of charge via [www.ccdc.cam.ac.uk/data\\_request/cif](http://www.ccdc.cam.ac.uk/data_request/cif) (or from the Cambridge Crystallographic Data Centre, 12, Union Road, Cambridge CB2 1EZ, UK; fax: (+44) 1223-336-033; or [deposit@ccdc.cam.ac.uk](mailto:deposit@ccdc.cam.ac.uk)).

## References

- [1] G. M. Sheldrick, *SHELXTL/PC Version 6.12 for Windows XP*, Bruker AXS Inc., Madison, WI, 2001.

**Table 1.** Crystal data and structure refinements for **6**.

|                                                      | <b>6</b>                                                        |
|------------------------------------------------------|-----------------------------------------------------------------|
| Empirical formula                                    | C <sub>29</sub> H <sub>25</sub> N <sub>3</sub> O <sub>10</sub>  |
| Formula weight                                       | 575.52                                                          |
| Temperature (K)                                      | 100(2)                                                          |
| Wavelength (Å)                                       | 0.71073                                                         |
| Crystal system/space group                           | Monoclinic, <i>P2(1)/c</i>                                      |
| Unit cell dimensions                                 |                                                                 |
| <i>a</i> (Å)                                         | 9.4026(2)                                                       |
| <i>b</i> (Å)                                         | 32.1434(7)                                                      |
| <i>c</i> (Å)                                         | 9.1405(2)                                                       |
| <i>α</i> (°)                                         | 90                                                              |
| <i>β</i> (°)                                         | 110.9000(10)                                                    |
| <i>γ</i> (°)                                         | 90                                                              |
| Volume (Å <sup>3</sup> )                             | 2580.78(10)                                                     |
| Z                                                    | 4                                                               |
| Calculated density (g/cm <sup>-3</sup> )             | 1.481                                                           |
| Absorption coefficient (mm <sup>-1</sup> )           | 0.114                                                           |
| Reflections collected                                | 47551                                                           |
| Independent reflections [ <i>R</i> (int)]            | 6427 [0.0309]                                                   |
| Refinement method                                    | Full-matrix<br>least-squares on <i>F</i> <sup>2</sup>           |
| Data/restraints/parameters                           | 6427/0/380                                                      |
| Goodness-of-fit on <i>F</i> <sup>2</sup>             | 1.014                                                           |
| Final <i>R</i> indices [ <i>I</i> > 2σ( <i>I</i> )]  | <i>R</i> <sub>1</sub> = 0.0357, <i>wR</i> <sub>2</sub> = 0.0912 |
| <i>R</i> indices (all data)                          | <i>R</i> <sub>1</sub> = 0.0427, <i>wR</i> <sub>2</sub> = 0.0964 |
| Largest difference peak and hole (e/Å <sup>3</sup> ) | 0.368 and -0.257                                                |

**Table 2.** Selected bond distances (Å) and angles (°) for **6**.

| Bond Distances (Å) |            |
|--------------------|------------|
| N2-C23             | 1.4793(13) |
| N2-C9              | 1.4708(13) |
| N2-C12             | 1.4699(13) |
| C9-C8              | 1.5143(15) |
| C9-C10             | 1.5292(15) |
| C10-O7             | 1.4460(13) |
| C10-C11            | 1.5249(16) |
| C11-C12            | 1.5417(15) |
| C11-O6             | 1.4359(13) |
| O6-C14             | 1.3599(13) |
| C14-O5             | 1.2003(14) |
| C14-C13            | 1.5074(16) |
| C13-C12            | 1.5321(15) |
| Bond Angles (°)    |            |
| C12-N2-C9          | 107.84(8)  |
| N2-C9-C10          | 102.02(8)  |
| C9-C10-C11         | 100.23(9)  |
| C10-C11-C12        | 104.87(8)  |
| C12-C11-O6         | 107.77(9)  |
| C11-O6-C14         | 110.86(8)  |
| O6-C14-C13         | 110.77(9)  |
| C14-C13-C12        | 105.31(9)  |
